# Supplementary material for: Development of a Soy Protein Hydrolysate with an Antihypertensive Effect
Source: PubMed Central journal article supplement (PMC6470933; doi:10.3390/ijms20061496), 2019-03-25
Supplement: ijms-20-01496-s001.pdf [file ijms-20-01496-s001.pdf]

Table S1: LC-ESI-TOF-MS/MS analysis of P-SPI-derived peptides

| Peptide Sequence                         | Prec m/z | Theor MW | Prec z |
|------------------------------------------|----------|----------|--------|
| AAAQSQSSCTNVLSLSPCLNYITGNSSTPSSGC        | 837.5884 | 3346.512 | 0      |
| AAEFEPSS                                 | 419.2506 | 836.3552 | 2      |
| AAEKTDMGYISLNGFLSQW                      | 533.4506 | 2130.009 | 0      |
| AAGKEMGLH                                | 457.34   | 912.4487 | 0      |
| AAGLLKLEGIHEGRK                          | 796.5148 | 1590.921 | 2      |
| AAHVTNEGLDAAGHAIGTAWAVF                  | 760.3182 | 2278.113 | 3      |
| AAKAFVRVWK                               | 588.3919 | 1174.698 | 2      |
| AAKAFVRVWK                               | 588.3919 | 1174.698 | 2      |
| AAKAFVRVWK                               | 588.3919 | 1174.698 | 2      |
| AAKYIIHNVELKSVK                          | 571.7062 | 1711.999 | 3      |
| AALALAVRAGSVL                            | 606.3935 | 1210.74  | 2      |
| AALFVIACHTG                              | 551.893  | 1101.564 | 2      |
| AAPVAFIAAVVIVV                           | 670.461  | 1338.828 | 2      |
| AAQVVNGCN                                | 438.2853 | 874.3967 | 2      |
| AAVKFRWGVRIPEFKGNNAF                     | 595.3783 | 2377.281 | 0      |
| ACGKLRALN                                | 473.3423 | 944.5226 | 0      |
| ACGMQ                                    | 255.065  | 508.1774 | 2      |
| ACPPPG                                   | 271.0599 | 540.2366 | 2      |
| ACRICFNDSKVLTLQLCPNQKEAIGWYDNCMLRYSNRSIF | 786.3422 | 4712.258 | 6      |
| ACSAFRNAQTENLF                           | 786.3457 | 1570.72  | 2      |
| ACTTNNPDERIGIREAVRRLKAAR                 | 678.4767 | 2709.457 | 0      |
| AEFAHGNVQQSMEMLCN                        | 506.4749 | 2021.839 | 0      |
| AEKKTGVTVTGQTTGGVKS                      | 975.0653 | 1948.048 | 2      |
| AEMMKVFDDIKLCNCSPDIVTWNTLLAVFGQN         | 904.6917 | 3614.728 | 0      |
| AFAHLETQFKF                              | 669.9554 | 1337.677 | 2      |
| AFCSTSSM                                 | 425.1347 | 848.3044 | 0      |
| AFFTDFAD                                 | 467.2058 | 932.3916 | 0      |
| AFGLQKN                                  | 389.2641 | 776.4181 | 0      |
| AFGVFVYE                                 | 311.1828 | 930.4487 | 0      |
| AFLEDA                                   | 333.1674 | 664.3068 | 2      |
| AFLETIVNNR                               | 588.8909 | 1175.63  | 2      |
| AFNVAGS                                  | 333.1669 | 664.3181 | 2      |
| AFQVLRGSKCGR                             | 441.2959 | 1320.709 | 0      |
| AFTGVHGYGFALV                            | 669.9554 | 1337.677 | 2      |
| AFTGVHGYGFALV                            | 669.9554 | 1337.677 | 2      |
| AFTVGSKQ                                 | 419.2505 | 836.4392 | 2      |
| AFVASVSA                                 | 751.5147 | 750.3912 | 0      |
| AGASYVSSALVTTVHHVTRTH                    | 549.375  | 2193.129 | 0      |
| AGCNAME                                  | 348.0698 | 694.2415 | 2      |
| AGGVVILLAVAAILRTL                        | 588.4114 | 1762.144 | 3      |
| AGISIGVVTGLLLAF                          | 772.4872 | 1542.939 | 2      |
| AGKYDMGALCMHAHSEMLEALINDALDKGA           | 794.5619 | 3174.461 | 0      |

|                                    |          |          |   |
|------------------------------------|----------|----------|---|
| AGMSTKKYETK                        | 415.2111 | 1242.628 | 0 |
| AGNKVRP                            | 371.2185 | 740.4293 | 0 |
| AGPAGH                             | 255.0648 | 508.2394 | 2 |
| AGPAHG                             | 255.065  | 508.2394 | 2 |
| AGTPKKNEI                          | 957.505  | 956.5291 | 0 |
| AGYYDTEHTKNVRDWKEVF                | 786.6649 | 2357.108 | 3 |
| AHARICSIIRK                        | 634.45   | 1266.734 | 0 |
| AHCPMCR                            | 409.1619 | 816.3193 | 0 |
| AHGFLVSDAACCPSGCNPNQKPCNNR         | 676.4974 | 2702.157 | 0 |
| AHKANNNTQFE                        | 425.2114 | 1272.585 | 0 |
| AHLKSKKS                           | 449.8242 | 897.5396 | 2 |
| AHNAARSEVGVQNLAWDDTVAAFAQNYANQ     | 808.5825 | 3230.513 | 0 |
| AHNGGLVPL                          | 439.2902 | 876.4818 | 2 |
| AHNIGETLQEK                        | 620.4099 | 1238.626 | 2 |
| AHNNGSKCKSSG                       | 397.1817 | 1188.531 | 0 |
| AHNNKRH                            | 438.7846 | 875.4474 | 2 |
| AHNRITN                            | 413.2563 | 824.4253 | 2 |
| AHQKLSSELGFAE                      | 665.4094 | 1328.673 | 2 |
| AHQMTSCR                           | 467.2123 | 932.3956 | 0 |
| AHRKVDKPRFVSAF                     | 553.3487 | 1656.921 | 3 |
| AHRKVGKRR                          | 554.3708 | 1106.69  | 2 |
| AHSSVHK                            | 383.166  | 764.3929 | 0 |
| AHVADFLAKFLQDTGTSECMSSIAGSYGYIAPEY | 925.6397 | 3698.691 | 0 |
| AHVELSSM                           | 437.1919 | 872.4062 | 0 |
| AIFGKQN                            | 389.2645 | 776.4181 | 0 |
| AIFYLKSF                           | 494.8228 | 987.543  | 2 |
| AIHPLMKKQ                          | 533.3454 | 1064.617 | 2 |
| AIKKAS                             | 617.4013 | 616.3908 | 0 |
| AIKKAS                             | 617.403  | 616.3908 | 0 |
| AIKKAS                             | 617.4004 | 616.3908 | 0 |
| AIKKAS                             | 617.4045 | 616.3908 | 0 |
| AIKKSINKLPQAVVLK                   | 546.3979 | 1636.04  | 0 |
| AINHDLH                            | 819.4487 | 818.4035 | 0 |
| AISSFARASK                         | 519.4002 | 1036.567 | 0 |
| AIVADSDLAKIL                       | 672.4331 | 1342.734 | 2 |
| AIVHALL                            | 736.5279 | 735.4643 | 0 |
| AIYREVVALDKQAGA                    | 802.5187 | 1602.873 | 2 |
| AKAKTNFPHTA                        | 593.3996 | 1184.63  | 0 |
| AKANKARK                           | 443.8049 | 885.5508 | 2 |
| AKAYVVVNDSCYHQLISH                 | 683.3071 | 2046.983 | 3 |
| AKDLKLHTKQLRRTL                    | 607.7579 | 1820.111 | 3 |
| AKEQRKPYVVVFV                      | 782.4858 | 1562.882 | 2 |
| AKFDVKIT                           | 461.3176 | 920.5331 | 2 |
| AKHKVEFVDG                         | 565.4086 | 1128.593 | 2 |
| AKHKVEFVDG                         | 565.4103 | 1128.593 | 2 |

|                                  |          |          |   |
|----------------------------------|----------|----------|---|
| AKISKFIPALN                      | 601.4376 | 1200.723 | 2 |
| AKITPIVILSC                      | 579.425  | 1156.689 | 2 |
| AKKRAKRQKK                       | 621.4088 | 1240.82  | 2 |
| AKLDKCRKLIK                      | 658.4669 | 1314.817 | 2 |
| AKLPRLRGVVLHSGI                  | 808.5797 | 1615.005 | 0 |
| AKNTVASKLGF                      | 596.908  | 1191.661 | 2 |
| AKSQPSNSIPDRITLMIEEVGAEIEKQNMQES | 865.6199 | 3458.666 | 0 |
| AKSVHGYVIRKEMAG                  | 549.3742 | 1644.877 | 0 |
| AKTSRQLRK                        | 544.4125 | 1086.662 | 2 |
| AKVGLKAGGFFVLKE                  | 782.5586 | 1562.919 | 0 |
| ALALLHV                          | 736.5279 | 735.4643 | 0 |
| ALENNNPGFISIDCGSEAAYSHTETGIWF    | 786.5972 | 3142.398 | 0 |
| ALHKEPDTEICASMLDSLNEC            | 580.5119 | 2318.023 | 0 |
| ALIKATTSNYN                      | 598.3967 | 1194.625 | 2 |
| ALKKALKN                         | 443.3014 | 884.5807 | 0 |
| ALKKHGNN                         | 441.2637 | 880.4879 | 2 |
| ALKKHGNN                         | 441.264  | 880.4879 | 2 |
| ALLVMVKKKRGGR                    | 756.9897 | 1511.945 | 2 |
| ALLVTPPAKVIQGV                   | 703.5068 | 1404.871 | 2 |
| ALQKRARVKK                       | 599.3931 | 1196.783 | 0 |
| ALQKRARVKK                       | 599.392  | 1196.783 | 0 |
| ALQKRARVKK                       | 599.3928 | 1196.783 | 0 |
| ALQVTSSSVRLVSSN                  | 774.5001 | 1546.832 | 2 |
| ALRNFAFA                         | 455.311  | 908.4868 | 0 |
| ALRVKPAHPIVGAVAPIF               | 619.4369 | 1855.12  | 0 |
| ALRYQQCLEIIS                     | 762.3227 | 1522.781 | 2 |
| ALSSAKGERKLTTPKQKATK             | 575.4101 | 2297.391 | 0 |
| ALVVGEAEKRTISVIK                 | 609.4113 | 1825.104 | 3 |
| ALVVLKENLVTLF                    | 786.5034 | 1570.97  | 2 |
| ANGLLVLYITI                      | 595.3799 | 1188.712 | 0 |
| ANGNKVTVGVIQW                    | 693.4857 | 1384.746 | 2 |
| ANIKAIRAAS                       | 507.8671 | 1013.598 | 2 |
| ANKKKSQKGN                       | 551.893  | 1101.626 | 2 |
| ANLHITSSH                        | 490.3563 | 978.4883 | 2 |
| ANLVLF                           | 676.4975 | 675.3956 | 0 |
| ANNQPAASVVTYDQNQYSDKSGSYVANN     | 810.5562 | 3238.444 | 0 |
| ANPPIFHR                         | 476.3061 | 950.5086 | 0 |
| ANPQTEGDLPKVT                    | 685.4332 | 1368.689 | 0 |
| ANSLIDMYA                        | 499.2474 | 996.4586 | 0 |
| ANTPLSHISPVGR                    | 724.4502 | 1446.794 | 2 |
| ANVVWLHLGVNSG                    | 683.4274 | 1364.72  | 0 |
| APGGNGATG                        | 351.1752 | 700.314  | 0 |
| APIFN                            | 281.1794 | 560.2958 | 2 |
| APILGEARLLSVGLF                  | 786.5034 | 1570.908 | 2 |
| APKTGKTKPHKAKGEKK                | 925.5664 | 1849.09  | 2 |

|                                             |          |          |   |
|---------------------------------------------|----------|----------|---|
| APLISH                                      | 637.4276 | 636.3595 | 0 |
| APLLPNK                                     | 752.5151 | 751.4592 | 0 |
| APPLPV                                      | 593.4027 | 592.3585 | 0 |
| APPLPV                                      | 593.4014 | 592.3585 | 0 |
| APPLPV                                      | 593.402  | 592.3585 | 0 |
| APQDPPIW                                    | 462.2543 | 922.4549 | 2 |
| APQKN                                       | 279.2315 | 556.2969 | 2 |
| APQNK                                       | 279.2306 | 556.2969 | 2 |
| APRNKAKP                                    | 441.3132 | 880.5243 | 2 |
| APSHGEASSNNNTTMYGFQMOTS                     | 637.4761 | 2546.044 | 0 |
| APVCYVAG                                    | 390.2314 | 778.3683 | 2 |
| APVPNFFVPMVQQGQQGQRPGRRPGAVQQ               | 808.5799 | 3230.663 | 0 |
| AQAALGVVFKLVEI                              | 729.4785 | 1456.865 | 2 |
| AQATKSRN                                    | 438.2853 | 874.4621 | 2 |
| AQFFTSMLCHMKFGLFIFF                         | 772.3473 | 2314.114 | 3 |
| AQFRKKIATLS                                 | 631.9361 | 1261.751 | 2 |
| AQHIIRKLF                                   | 563.37   | 1124.682 | 2 |
| AQLLSISLVALGS                               | 636.4635 | 1270.75  | 2 |
| AQLQELDGEDARLADYFDVIAGTSTGGIVTAM            | 832.6314 | 3326.598 | 0 |
| ARFPPNQi                                    | 471.8381 | 941.5083 | 2 |
| ARILSEIIVN                                  | 672.4331 | 1342.764 | 2 |
| ARPAH                                       | 551.3547 | 550.2976 | 0 |
| ARRAAFAF                                    | 455.3114 | 908.498  | 0 |
| ARSLLSASRASH                                | 628.4073 | 1254.679 | 2 |
| ARVKPPKN                                    | 455.333  | 908.5556 | 2 |
| ASAAVLWNK                                   | 959.5198 | 958.5236 | 0 |
| ASAHNMS                                     | 367.1713 | 732.2861 | 0 |
| ASGAASAPLRN                                 | 507.8672 | 1013.525 | 2 |
| ASIAVGLRGTLHVAIVQAAL                        | 519.1124 | 2072.247 | 0 |
| ASKKKNSAKSVR                                | 652.4084 | 1302.773 | 0 |
| ASNCD                                       | 255.0648 | 508.1588 | 2 |
| ASNLQCGTFNTNLGCAEFGSIEQRGMFQRTNSATTVSMGNRHV | 1173.802 | 4691.148 | 0 |
| ASQHLATLTGHQGP                              | 709.4482 | 1416.711 | 0 |
| ASQNVKHP                                    | 440.8135 | 879.4562 | 2 |
| ASQTYKSNIELIENSQKS                          | 681.3088 | 2040.985 | 3 |
| ASRSKSKDRKANKDAQK                           | 959.52   | 1917.05  | 0 |
| ASVYKSLHNQIAPGQKWNPLNFVLGCSFL               | 808.5789 | 3230.67  | 0 |
| ATAKTNTTIYQDVF                              | 786.8363 | 1571.783 | 2 |
| ATGTTVRSa                                   | 432.2802 | 862.4509 | 0 |
| ATLSVVLNALAID                               | 650.4203 | 1298.745 | 2 |
| ATTRIVRPPKK                                 | 441.3724 | 1320.847 | 0 |
| ATTTTNGGAMEELLSQLQSHVQ                      | 772.6533 | 2315.106 | 3 |
| ATVANCKQL                                   | 457.2691 | 912.5029 | 0 |
| AVAARKKFRFKK                                | 725.519  | 1448.909 | 2 |
| AVADLRHKNLV                                 | 618.3949 | 1234.715 | 2 |

|                                   |          |          |   |
|-----------------------------------|----------|----------|---|
| AVDEDNKGNYAKAF                    | 771.3305 | 1540.716 | 2 |
| AVFPNIYTAMANR                     | 734.3217 | 1466.734 | 2 |
| AVGKHIFLC                         | 494.3195 | 986.5372 | 2 |
| AVGYGIGFSH                        | 504.3285 | 1006.487 | 2 |
| AVIGSFGYIAPEYVQ                   | 538.6729 | 1612.814 | 3 |
| AVIHRDM                           | 421.3191 | 840.4276 | 0 |
| AVISIPAFSH                        | 521.3857 | 1040.565 | 2 |
| AVKKLNNLLFQQ                      | 708.4875 | 1414.83  | 0 |
| AVMILLAV                          | 415.2706 | 828.5143 | 0 |
| AVPLFH                            | 683.4311 | 682.3802 | 0 |
| AVQVELQPNRN                       | 634.4502 | 1266.668 | 0 |
| AVRKVASSFH                        | 551.391  | 1100.609 | 2 |
| AVTLVLVSYAMGDSAQDKQRCAESLAG       | 696.5413 | 2782.363 | 0 |
| AYCFTFAF                          | 485.1756 | 968.4102 | 2 |
| AYINKAKNSS                        | 548.3516 | 1094.572 | 2 |
| AYKVLLEMQIGG                      | 441.2802 | 1320.711 | 3 |
| AYNCAIY                           | 409.1609 | 816.3476 | 0 |
| AYNNKAGST                         | 463.3009 | 924.4301 | 0 |
| AYYKDFNIEGCAVPGPANCASNPSNWWEA     | 808.5771 | 3230.386 | 0 |
| CAEAVLPDSCENTDSITSQDLF            | 786.6649 | 2357.004 | 3 |
| CAITVRKSALQKLI                    | 772.4888 | 1542.928 | 2 |
| CAKSFAPFPNGC                      | 311.145  | 1240.537 | 0 |
| CAKSFAPFPNGC                      | 311.1464 | 1240.537 | 0 |
| CCGFGRKTNCT                       | 397.1795 | 1188.484 | 0 |
| CCGFGRKTNCT                       | 397.1811 | 1188.484 | 0 |
| CCHSQTEPIELNGQARFREKNPATAVAS      | 765.1545 | 3056.456 | 0 |
| CCKNKAFKCQT                       | 425.2106 | 1272.578 | 0 |
| CDNARTQ                           | 404.2053 | 806.3341 | 0 |
| CFCALVPP                          | 425.2108 | 848.3925 | 0 |
| CFNENAYMAACVAVNTCF                | 493.385  | 1969.783 | 0 |
| CFNIGLPSGK                        | 518.3412 | 1034.522 | 2 |
| CFRNTSFG                          | 311.1452 | 930.4018 | 0 |
| CFVSSTFCLIKAGAV                   | 773.3507 | 1544.773 | 2 |
| CGKRN                             | 289.1524 | 576.2802 | 2 |
| CGNSGGSKQ                         | 419.2496 | 836.3447 | 2 |
| CGSGLSGETISENGHHWIGLDISASMLNVAVER | 860.6633 | 3438.63  | 0 |
| CIHVCEVC                          | 453.1677 | 904.3605 | 0 |
| CIR RTP                           | 373.2708 | 744.4065 | 0 |
| CKQVLEERN                         | 559.8896 | 1117.555 | 2 |
| CKRLFERRGFRIT                     | 561.3934 | 1680.936 | 0 |
| CLKKKGH                           | 813.4637 | 812.4691 | 0 |
| CLSLDVVFAIAFLV                    | 378.212  | 1508.831 | 0 |
| CMCGQ                             | 271.0604 | 540.1495 | 2 |
| CMVWFVVDYGACG                     | 367.1705 | 1464.588 | 0 |
| CNTDFFPEALQNSEVTSSSNCCYEEN        | 733.5419 | 2930.132 | 0 |

|                                   |          |          |   |
|-----------------------------------|----------|----------|---|
| CPELVDRERCTDMAFSWTMQSCQVLY        | 786.5955 | 3142.333 | 0 |
| CSSDLRIRRLR                       | 716.4594 | 1430.789 | 2 |
| CTCTCSCP                          | 409.161  | 816.2275 | 0 |
| CTGYVISSKSG                       | 551.3537 | 1100.517 | 0 |
| CTKWSWPSCCATKCS                   | 423.3606 | 1689.677 | 0 |
| CTYINNPH                          | 481.2371 | 960.4124 | 0 |
| CTYINNPH                          | 481.2378 | 960.4124 | 0 |
| CTYINNPH                          | 481.2376 | 960.4124 | 0 |
| CTYINNPH                          | 481.2368 | 960.4124 | 0 |
| CYNCGLVFCHSCSS                    | 381.2957 | 1521.551 | 0 |
| DAKPAVTDVSKPSALAKK                | 913.5139 | 1825.031 | 0 |
| DAMPTIKITHE                       | 628.4073 | 1254.628 | 2 |
| DCFGVQYFGYFSDDIGYSVQFGGPGGSCGN    | 786.5969 | 3142.275 | 0 |
| DCFIVCVNCDSPKCEGDCKPCINCLSS       | 965.7225 | 2894.155 | 0 |
| DDVGLVR                           | 387.1916 | 772.4079 | 0 |
| DEEQPQCVETDKGCQRQS                | 736.3023 | 2205.908 | 3 |
| DEEQPQCVETDKGCQRQS                | 736.3023 | 2205.908 | 3 |
| DEERVMFRSVGLRMKAYLPLGIRGVF        | 760.582  | 3038.631 | 0 |
| DEERVMFRSVGLRMKAYLPLGIRGVF        | 760.5834 | 3038.631 | 0 |
| DEERVMFRSVGLRMKAYLPLGIRGVF        | 760.583  | 3038.631 | 0 |
| DEGPPS                            | 301.1388 | 600.2391 | 2 |
| DEKGRISTYKVEF                     | 786.3473 | 1570.799 | 2 |
| DFGAEYVISSGVF                     | 760.3215 | 1518.688 | 2 |
| DFIKTKMGNRSDMGFSTPQGPRGSDDVSSN    | 808.5799 | 3230.472 | 0 |
| DFLGKDG                           | 376.2608 | 750.3548 | 2 |
| DFQREVLDTQDKIEDDHEENQRKR          | 776.1432 | 3100.445 | 4 |
| DFRSLTLVSTDLMLRSAREF              | 786.3421 | 2356.221 | 3 |
| DFRVSVKKIKWN                      | 507.3302 | 1518.867 | 3 |
| DGACSNVVEAELDES VKSKEKKKKKNKTNKKK | 941.5072 | 3762.031 | 0 |
| DGDFEEEEVWAVF                     | 786.3393 | 1570.646 | 2 |
| DGGDVSADPGGGSG                    | 383.1669 | 1146.443 | 0 |
| DGPPNSF                           | 367.171  | 732.3079 | 0 |
| DGRYAGSHSSYNGEVEEGMIPEEEGMI       | 736.5307 | 2942.233 | 0 |
| DGTLLAPS                          | 387.1799 | 772.3967 | 2 |
| DHGAVPKLVKLL                      | 645.4893 | 1288.787 | 0 |
| DHMGVPLL                          | 441.2967 | 880.4477 | 0 |
| DHNHPLVVSPEARQTM                  | 497.4146 | 1985.985 | 0 |
| DHNNSF                            | 367.1709 | 732.2827 | 0 |
| DHNQAKESCNQESTPMPRESS             | 555.4563 | 2217.89  | 0 |
| DHNRRFKGYGHVEF                    | 441.2958 | 1760.85  | 0 |
| DHNSSSS                           | 367.1697 | 732.2675 | 0 |
| DHNSSSS                           | 367.17   | 732.2675 | 0 |
| DHNSSSS                           | 367.1705 | 732.2675 | 0 |
| DHNSSSS                           | 367.1712 | 732.2675 | 0 |
| DHRNCSS                           | 409.1614 | 816.3058 | 0 |

|                                          |          |          |   |
|------------------------------------------|----------|----------|---|
| DIKLEKILLCDDFCPKISDFRLAKLRKKEDMATMSRRKGT | 943.345  | 4711.516 | 5 |
| DIKLEKILLCDDFCPKISDFRLAKLRKKEDMATMSRRKGT | 943.3455 | 4711.516 | 5 |
| DIKLEKILLCDDFCPKISDFRLAKLRKKEDMATMSRRKGT | 943.3455 | 4711.516 | 5 |
| DIKLEKILLCDDFCPKISDFRLAKLRKKEDMATMSRRKGT | 943.3455 | 4711.516 | 5 |
| DKAQSTRPKGHC                             | 443.2172 | 1326.646 | 0 |
| DKHEKDESKDKNDC                           | 423.3781 | 1689.726 | 0 |
| DLHPFTVP                                 | 463.3022 | 924.4705 | 2 |
| DLHSFDTELLPEMYGVHNEYLT                   | 656.4903 | 2622.195 | 0 |
| DLKPPFNSSHFS                             | 357.2605 | 1424.673 | 0 |
| DLPAVM                                   | 323.1442 | 644.3204 | 0 |
| DLSTQTSGLTRDWSPMSIC                      | 550.4986 | 2197.998 | 0 |
| DLTPSPAKPVRN                             | 647.9415 | 1293.704 | 2 |
| DNDGVSEMIVAVSYFFDHEYYDNQEHR              | 820.5967 | 3278.389 | 0 |
| DNHVMETCFKLHGHPDWHLKGKTPNAKVDAI          | 910.6662 | 3638.787 | 0 |
| DNMNLGWKETNCSDDVLSNTSPINTPSH             | 773.1239 | 3088.35  | 4 |
| DNNNKSTK                                 | 460.8006 | 919.4359 | 2 |
| DPKLGVPLLLTIM                            | 705.511  | 1408.836 | 0 |
| DPNWK                                    | 659.2844 | 658.3075 | 0 |
| DPSIGL                                   | 301.1421 | 600.3119 | 2 |
| DQIMKRLVSAARR                            | 772.5242 | 1542.878 | 2 |
| DQIRQCS                                  | 425.2113 | 848.381  | 0 |
| DQYYCLSKECLNQTS                          | 449.3573 | 1793.76  | 0 |
| DRAHAALPPGYRF                            | 735.9954 | 1469.753 | 2 |
| DRHRRRRSS                                | 409.1624 | 1224.666 | 0 |
| DSAHIPTKLFL                              | 621.3947 | 1240.682 | 0 |
| DSDPCNDHQPSVDVEVEKQ                      | 535.9001 | 2139.902 | 4 |
| DSRYQLVAKGK                              | 632.9174 | 1263.694 | 2 |
| DSWGSGRKDKVTQEDNSGSGGWGANR               | 720.5243 | 2878.334 | 0 |
| DTFLLGDLEDSDEAPDDGEGSFD                  | 615.4917 | 2457.982 | 0 |
| DTGHCEEGLQKAEESISIKRSFEAYFL              | 772.5836 | 3086.466 | 0 |
| DTPEAT                                   | 317.2043 | 632.2653 | 2 |
| DVAIYGGC                                 | 399.1407 | 796.3425 | 0 |
| DVFWDLKGAKF                              | 663.3461 | 1324.682 | 2 |
| DVGHN                                    | 271.0604 | 540.2292 | 2 |
| DVTSKMPAVHQ                              | 663.3461 | 1324.645 | 2 |
| DWMKTAMGVSKQDLMET                        | 493.3842 | 1969.895 | 0 |
| DYENSYPWCKNES                            | 409.3636 | 1633.636 | 0 |
| DYMGQFG                                  | 409.1614 | 816.3112 | 0 |
| DYNRMARSS                                | 367.1712 | 1098.488 | 0 |
| DYPPSHRPTG                               | 376.2588 | 1125.52  | 0 |
| EADDPGALAAVGLRAISTILESVSLLPQLF           | 786.5973 | 3142.622 | 0 |
| EAFPWSCNSSFMYTMENHNSVLGIREYA             | 821.592  | 3282.421 | 0 |
| EAFRFDYEKMEEEFKIFV                       | 786.3352 | 2356.109 | 3 |
| EANTHFKYFKDNPDSNNPAYNTKKGIYD             | 1097.801 | 3290.527 | 0 |
| EASSAQELHCFSDFSFQEIKEATSNFNPSKKIG        | 941.7003 | 3762.747 | 0 |

|                                                 |          |          |   |
|-------------------------------------------------|----------|----------|---|
| EAYVIGHH                                        | 463.3274 | 924.4454 | 0 |
| EAYVIGHH                                        | 463.3277 | 924.4454 | 0 |
| ECQSEDVDFESEAKKQVCG                             | 533.4521 | 2129.888 | 0 |
| EDCESI                                          | 348.0698 | 694.248  | 2 |
| EDVTILLS                                        | 445.2313 | 888.4804 | 0 |
| EECCM                                           | 614.178  | 613.1546 | 0 |
| EEEEVRCLRNCKHIFH                                | 681.3104 | 2040.962 | 3 |
| EEIDYELSKCQVEAESQPIF                            | 786.3352 | 2356.078 | 3 |
| EEIDYELSKCQVEAESQPIF                            | 786.3353 | 2356.078 | 3 |
| EELGNGKTRFYVGPITQKRSIEETDESDKCL                 | 910.6626 | 3638.789 | 0 |
| EELSKKSG                                        | 439.2888 | 876.4553 | 2 |
| EERPGKN                                         | 415.2109 | 828.409  | 2 |
| EFGEKRQGT                                       | 351.1746 | 1050.509 | 0 |
| EFKGKTLRCSLSETKHRLFIGNVPK                       | 963.6014 | 2887.585 | 0 |
| EGEEGSGGAAERLEEISSENSGPTRSSEDDFEGGAEPEDDDDAHGDN | 857.219  | 5137.044 | 6 |
| EGGVCSCIGSALCQEQSTPDDDDVLEEN                    | 732.5478 | 2926.179 | 0 |
| EGHFLSSWTMGGNP                                  | 760.3225 | 1518.656 | 2 |
| EGISYQVTRI                                      | 389.2653 | 1164.614 | 0 |
| EGKNWVKILVLTGS                                  | 772.4888 | 1542.877 | 2 |
| EGKSLAEAEGLFFMETSALDSTNVKMAF                    | 760.5823 | 3038.425 | 0 |
| EHHEKK                                          | 404.2054 | 806.4035 | 0 |
| EHLFLVGLQK                                      | 656.4381 | 1310.771 | 2 |
| EHKQQWLRFNQSTK                                  | 653.4212 | 1956.992 | 0 |
| EHNLQILF                                        | 507.3259 | 1012.534 | 0 |
| EHVDDGAGKPHPKIHTIFSTECTTYFDW                    | 808.5795 | 3230.477 | 0 |
| EIAGEKAGIFKHRIPAF                               | 628.7576 | 1883.042 | 3 |
| EICIGVACGLHYLHAGAKRSIF                          | 786.6649 | 2357.214 | 3 |
| EIEKGLIR                                        | 557.412  | 1112.667 | 2 |
| EIQVLRKISTLA                                    | 736.5004 | 1470.877 | 2 |
| EIRQKME                                         | 467.2038 | 932.475  | 0 |
| EISELQKEVTDLKNLVDDLNNKQGG                       | 700.5533 | 2798.43  | 0 |
| EISFVPTT                                        | 447.3458 | 892.4542 | 2 |
| EIVYSGRVS                                       | 505.3469 | 1008.524 | 0 |
| EKDNIDMDNVCNLEYCVPR                             | 786.3359 | 2356.013 | 3 |
| EKGKCLKQ                                        | 530.4028 | 1058.645 | 0 |
| EKKK                                            | 532.3831 | 531.3381 | 0 |
| EKKK                                            | 532.3836 | 531.3381 | 0 |
| EKKKDTMHGKGNF                                   | 760.3215 | 1518.761 | 2 |
| EKLKVFVVP                                       | 598.3967 | 1194.713 | 2 |
| EKSSDKMVPPEDEEWKLEETILSHVVLH                    | 919.6795 | 3674.85  | 0 |
| EKVCVVKGRAEELGKLYN                              | 707.4871 | 2119.146 | 0 |
| EKVKT                                           | 376.313  | 750.4276 | 2 |
| ELDYLSPKDEVIQREEAIRKEYKELDTVW                   | 963.7028 | 3850.963 | 0 |
| ELEANEANGHNIDNEEYS                              | 683.3071 | 2046.84  | 3 |
| ELITQRALEFGKAAN                                 | 573.3596 | 1716.916 | 3 |



|                                    |          |          |   |
|------------------------------------|----------|----------|---|
| ELKAIAPHS                          | 483.3757 | 964.5342 | 2 |
| ELKAIAPHS                          | 483.3757 | 964.5342 | 2 |
| ELKGRRVGKV                         | 571.4282 | 1140.709 | 2 |
| ELKLGEGGFGGVYK                     | 727.4555 | 1452.761 | 0 |
| ELKMLVALILS                        | 615.4544 | 1228.747 | 2 |
| ELKVRHKKPH                         | 636.4652 | 1270.762 | 2 |
| ELLELIDKKLS                        | 650.9235 | 1299.765 | 2 |
| ELNYSEMSSSNTYNSCSSGC               | 541.4408 | 2161.787 | 0 |
| ELPEPKQP                           | 469.3595 | 936.4916 | 2 |
| ELQGTYIERFREFLEDLCN                | 594.5289 | 2374.127 | 0 |
| ELRKLKQKF                          | 595.379  | 1188.734 | 0 |
| ELRKQGYN                           | 504.3367 | 1006.52  | 0 |
| ELTAPWTGVQIKVPVKFI                 | 507.327  | 2025.166 | 0 |
| ELTKPISLVY                         | 581.9031 | 1161.665 | 2 |
| ELVLKSAAKAFQAQ                     | 752.4873 | 1502.846 | 2 |
| EMPKIEKWVNVF                       | 760.3215 | 1518.791 | 2 |
| EPTPGKKLR                          | 513.3854 | 1024.603 | 2 |
| EQETAVIELQ                         | 387.179  | 1158.577 | 0 |
| EQGLVMDPPGGSDDRKRKRDMLDLSDGDSD     | 859.5977 | 3434.532 | 0 |
| ERMGECAAERWQK                      | 797.2888 | 1592.719 | 2 |
| ERNKGVEDQAYTNDMDCYYYSTSELPCKKHPSS  | 965.7186 | 3858.645 | 0 |
| ERPCLLYSSSSK                       | 685.4283 | 1368.671 | 2 |
| ERSGLSEGIPSLPEYLADYCSL             | 600.4638 | 2398.136 | 0 |
| ESISFGRF                           | 471.8381 | 941.4607 | 2 |
| ESNSVSHTIVPEQDFEQLPALPDAVACQFSALEK | 925.6392 | 3698.777 | 0 |
| ESSNQSIN                           | 483.1742 | 964.4098 | 2 |
| ETLPNN                             | 344.224  | 686.3235 | 2 |
| EVDRKGGKVRSLPGHEEFPDVGKIVGSF       | 760.5843 | 3038.594 | 0 |
| EVIDKIKEY                          | 568.8928 | 1135.613 | 2 |
| EVPVNGSF                           | 425.2123 | 848.3916 | 0 |
| EVVINPPKSLRPPGRPRKKRV              | 808.5792 | 2422.476 | 0 |
| EYGKQRRIQKCG                       | 367.1692 | 1464.762 | 0 |
| EYGKQRRIQKCG                       | 367.1703 | 1464.762 | 0 |
| EYGKQRRIQKCG                       | 367.1711 | 1464.762 | 0 |
| EYHVCRNH                           | 529.197  | 1056.456 | 2 |
| EYNKSENSE                          | 367.1707 | 1098.447 | 0 |
| EYPYNNFLHH                         | 667.2846 | 1332.589 | 2 |
| EYRRKNNFHSD                        | 367.1708 | 1464.686 | 0 |
| EYVKQCRSS                          | 367.1718 | 1098.513 | 0 |
| EYVKQCRSS                          | 367.1726 | 1098.513 | 0 |
| EYVKQCRSS                          | 367.1709 | 1098.513 | 0 |
| EYVKQCRSS                          | 367.1713 | 1098.513 | 0 |
| EYVKQCRSS                          | 367.1714 | 1098.513 | 0 |
| EYVKQCRSS                          | 367.1715 | 1098.513 | 0 |
| EYVKQCRSS                          | 367.1703 | 1098.513 | 0 |

|                                     |          |          |   |
|-------------------------------------|----------|----------|---|
| EYVKQCRSS                           | 367.1698 | 1098.513 | 0 |
| EYVKQCRSS                           | 367.1701 | 1098.513 | 0 |
| EYVP                                | 507.3534 | 506.2377 | 0 |
| EYVPNGS                             | 383.1667 | 764.3341 | 0 |
| EYVPNGS                             | 383.1655 | 764.3341 | 0 |
| FAKQK                               | 311.1871 | 620.3646 | 2 |
| FANGINPKKPVQN                       | 713.9822 | 1425.773 | 2 |
| FATIVNKYKAAMIEDVPRIFEAVFQCTLEMITK   | 955.7556 | 3818.981 | 0 |
| FCFGLILP                            | 455.3096 | 908.483  | 0 |
| FDIDKNLGKKCNA                       | 367.1705 | 1464.74  | 0 |
| FDNWWVGPQTEAKQNAGSGAS               | 563.2134 | 2249.014 | 4 |
| FEALLQEFKTDYNQTHF                   | 533.4501 | 2130.006 | 0 |
| FECLHIASSGSYNHTDSC                  | 493.3853 | 1969.794 | 0 |
| FEDMISWMQEGGQVGIFDATNSSKQRRN        | 808.5803 | 3230.487 | 0 |
| FEFESCSFDAVLCTVSVQYLQPEKVF          | 786.5979 | 3142.467 | 0 |
| FEFESCSFDAVLCTVSVQYLQPEKVF          | 786.5954 | 3142.467 | 0 |
| FELDDKEKQ                           | 576.3842 | 1150.551 | 2 |
| FENRCL                              | 391.285  | 780.3589 | 2 |
| FEPSVGVGVFLVST                      | 513.0022 | 1535.824 | 3 |
| FESPEAKKQ                           | 532.3572 | 1062.535 | 2 |
| FEVVVSAGQK                          | 532.3572 | 1062.571 | 2 |
| FFGRMTFWW                           | 639.4049 | 1276.585 | 0 |
| FFKCLHKLKNAVKLH                     | 609.4097 | 1825.055 | 3 |
| FFNGDWNTGGSCDNT                     | 409.3621 | 1633.61  | 0 |
| FFNIRLSKG                           | 541.3468 | 1080.608 | 2 |
| FGAFSGGGGS                          | 422.2924 | 842.3559 | 2 |
| FGCFLVMDPNNPTSINSALRYWGCTIQAG       | 794.5611 | 3174.472 | 0 |
| FGFQCNC                             | 453.1674 | 904.3207 | 0 |
| FGGTAA                              | 262.1445 | 522.2438 | 2 |
| FGVVLELVTGRNPNKAG                   | 628.7576 | 1883.063 | 3 |
| FHFLRAIGTA                          | 378.2114 | 1131.619 | 0 |
| FIGGLANLSQEQKYDRKQADMNLLMLF         | 786.598  | 3142.595 | 0 |
| FIIAVVF                             | 808.5798 | 807.4894 | 0 |
| FIMGGFLN                            | 449.8241 | 897.4418 | 2 |
| FIPLIGGIFSRKKGS                     | 810.5525 | 1618.956 | 0 |
| FIPPYKQRVS                          | 617.9318 | 1233.687 | 2 |
| FIVGKGGR                            | 417.292  | 832.4919 | 2 |
| FIVYGVNLTfVN                        | 693.459  | 1384.739 | 2 |
| FKASADDVTQTPITCLNCSKCEYPCQQQPSPLPYV | 997.6994 | 3986.82  | 0 |
| FKDLSFFVEVKCAPSVTAANRVVNSLCSS       | 808.5796 | 3230.647 | 0 |
| FKGKRVVFLKQLP                       | 520.6934 | 1558.971 | 3 |
| FKGLVDRKRLKLRN                      | 794.0364 | 1585.978 | 2 |
| FKGMSSRN                            | 463.8406 | 925.444  | 2 |
| FKISRIKIKIQDSRF                     | 627.1062 | 1878.12  | 3 |
| FKKVGHKK                            | 486.3776 | 970.6076 | 0 |

|                                  |          |          |   |
|----------------------------------|----------|----------|---|
| FKPLRKLL                         | 507.8672 | 1013.675 | 2 |
| FKRTRVLT                         | 546.3722 | 1090.661 | 2 |
| FKRWK                            | 764.5504 | 763.4493 | 0 |
| FLASPF                           | 419.3158 | 836.4545 | 2 |
| FLCPKEVRSGAKRI                   | 802.5187 | 1602.903 | 2 |
| FLEELMSLRRETWDTNPCSQENQLF        | 772.5826 | 3086.411 | 0 |
| FLFLLASQDLIMVASRCFCCGKPLNPGGS    | 772.5833 | 3086.522 | 0 |
| FLGGGFVKHMQENEFLQEVF             | 786.0136 | 2355.136 | 3 |
| FLHGAMSF                         | 455.2216 | 908.4214 | 0 |
| FLIQMERCND                       | 634.8705 | 1267.569 | 2 |
| FLKKCKNKAGKSNTM                  | 425.2858 | 1696.912 | 0 |
| FLKLGVKTRG                       | 559.8896 | 1117.697 | 2 |
| FLLDTSLNN                        | 575.3804 | 1148.608 | 2 |
| FLLLLTAYSSA                      | 599.8706 | 1197.665 | 2 |
| FLNAANFS                         | 442.3187 | 882.4236 | 2 |
| FLNLEKLV                         | 488.3311 | 974.5801 | 2 |
| FLNLISA                          | 777.5279 | 776.4432 | 0 |
| FLPPNQRGTVTGRLLVLDGGK            | 560.4131 | 2237.264 | 0 |
| FLPWQSWK                         | 546.3722 | 1090.56  | 2 |
| FLSLRKGT                         | 461.3621 | 920.5444 | 2 |
| FLSLSPLGCLPALRALNPEANKDGCFEAASA  | 794.5609 | 3174.584 | 0 |
| FLSPCRGVSLTVPSGQLGPLDAT          | 772.3407 | 2314.199 | 3 |
| FLSTPPIPSEILAKG                  | 523.997  | 1568.881 | 3 |
| FLVILSKKVKKKVLTTRTG              | 720.5245 | 2158.393 | 0 |
| FMEM                             | 279.1586 | 556.2025 | 2 |
| FMEM                             | 279.1577 | 556.2025 | 2 |
| FMFFLFMY                         | 573.219  | 1144.513 | 2 |
| FNANPSPNLFSLLF                   | 527.6783 | 1579.804 | 3 |
| FNDK                             | 262.1445 | 522.2438 | 2 |
| FNEMRNKGC                        | 367.1712 | 1098.459 | 0 |
| FNENEIVDGIKAENLIGKGGSGN          | 594.5274 | 2374.177 | 0 |
| FPGSEHPFVDRPLEPYVMPPRSGREMRPRARR | 955.7519 | 3818.948 | 0 |
| FQDTDLLQFVFNQAC                  | 435.358  | 1737.803 | 0 |
| FQELVEIGAKK                      | 421.3194 | 1260.708 | 0 |
| FQKVAIVTAS                       | 560.8615 | 1119.629 | 2 |
| FQVTRLQPN                        | 551.893  | 1101.593 | 2 |
| FRARYPSAK                        | 548.3518 | 1094.599 | 2 |
| FRHATHI                          | 441.3113 | 880.4668 | 2 |
| FRILREFL                         | 547.3422 | 1092.644 | 2 |
| FRKRTRRR                         | 588.3919 | 1174.727 | 2 |
| FRNIFSKKGMK                      | 678.4761 | 1354.754 | 0 |
| FRRQRN                           | 438.787  | 875.4838 | 2 |
| FRYDETC                          | 467.1001 | 932.3698 | 0 |
| FRYDETC                          | 467.2112 | 932.3698 | 0 |
| FSCATADC                         | 409.1611 | 816.2782 | 0 |

|                                       |          |          |   |
|---------------------------------------|----------|----------|---|
| FSCFSS                                | 339.1398 | 676.2527 | 0 |
| FSFTYGDM                              | 323.1442 | 966.3793 | 0 |
| FSGPCKPGLVFQVDGTLMA                   | 492.4608 | 1965.969 | 0 |
| FSGVLHAGQRIFVL                        | 772.5004 | 1542.867 | 2 |
| FSKRLIHH                              | 519.3438 | 1036.593 | 2 |
| FSLAMRL                               | 419.2496 | 836.4578 | 2 |
| FSLEVILTLFAFKCM                       | 441.2971 | 1760.925 | 0 |
| FSPAILLRLF                            | 588.8909 | 1175.707 | 2 |
| FSPATRMKNNAPNFS                       | 425.211  | 1696.799 | 0 |
| FSPVILKNEM                            | 393.2957 | 1176.621 | 0 |
| FSQNMKNHDLNSS                         | 381.1861 | 1520.668 | 0 |
| FSQNMKNHDLNSS                         | 381.1863 | 1520.668 | 0 |
| FSQNMKNHDLNSS                         | 381.1867 | 1520.668 | 0 |
| FSQNMKNHDLNSS                         | 381.1855 | 1520.668 | 0 |
| FSQNMKNHDLNSS                         | 381.1862 | 1520.668 | 0 |
| FSSFSA                                | 323.1455 | 644.2806 | 0 |
| FSSLR                                 | 609.3946 | 608.3282 | 0 |
| FSVLHPINKL                            | 584.3805 | 1166.681 | 2 |
| FTGGPGGGSG                            | 397.18   | 792.3402 | 0 |
| FTNGRVMPRSC                           | 423.1969 | 1266.596 | 0 |
| FTSNKENNST                            | 381.1867 | 1140.505 | 0 |
| FVAGKN                                | 635.4109 | 634.3439 | 0 |
| FVANLNK                               | 460.2895 | 918.4923 | 2 |
| FWGFFPLFQAIF                          | 760.3227 | 1518.77  | 2 |
| FYALFFDNDNIF                          | 763.3296 | 1524.693 | 2 |
| FYMIKNGEAILPKKGYFIYGI AVLTKLDPAWGRKYK | 1048.82  | 4191.311 | 0 |
| FYNHVVA                               | 425.2138 | 848.4181 | 0 |
| FYRRAQAYIETGDYL                       | 467.3149 | 1864.911 | 0 |
| GAAGLLRR                              | 813.53   | 812.498  | 0 |
| GAFRPGVLTALVGVTG                      | 758.0082 | 1513.862 | 2 |
| GAMLVYDMTKRQSFDMVKWLEELRGHADQNIVIMLI  | 1097.799 | 4387.21  | 0 |
| GAPAKKKKLG                            | 997.6907 | 996.6444 | 0 |
| GARHWIETLQ                            | 404.2066 | 1209.626 | 0 |
| GASSAGLEEKKEVK                        | 760.3227 | 1518.789 | 2 |
| GDAALNCLKIHWFGMSFFVLWTS               | 661.4838 | 2642.282 | 0 |
| GDFMVPSQGDSSSATEEAPTSTTTSTVAVA        | 733.5429 | 2930.298 | 0 |
| GDLTGIKKHYSRKHGEKK                    | 521.3215 | 2081.149 | 0 |
| GDNRAMSENEVEI                         | 732.3097 | 1462.636 | 2 |
| GDSSSVTEEAPTSTTTTAVTENPPGGGERRRKYRG   | 963.7054 | 3850.868 | 0 |
| GEEVAECIDPAKKKELDGLRAEMPVALAEGDR      | 860.6635 | 3438.712 | 0 |
| GEKVKKLAEQYA                          | 455.3121 | 1362.751 | 0 |
| GEKVKKLAEQYA                          | 455.3097 | 1362.751 | 0 |
| GEKVLVQFEDFANHNA                      | 455.3086 | 1816.874 | 0 |
| GELPHLK                               | 397.2369 | 792.4494 | 2 |
| GELPHLK                               | 397.2369 | 792.4494 | 2 |

|                                     |          |          |   |
|-------------------------------------|----------|----------|---|
| GELPHLK                             | 397.2355 | 792.4494 | 2 |
| GFGCKSVNAC                          | 493.3046 | 984.4157 | 0 |
| GFIDITIS                            | 433.2914 | 864.4593 | 0 |
| GFP AVI                             | 302.1956 | 602.3428 | 2 |
| GFSFSSQ                             | 380.2463 | 758.3235 | 2 |
| GGAPRGSFEN                          | 496.3288 | 990.4519 | 2 |
| GGDQIEGETSRIVGTYGYMAPEYAFDGLF       | 786.5981 | 3142.423 | 0 |
| GGGFIIVEGFH                         | 378.2117 | 1131.571 | 0 |
| GGGGAHGG                            | 285.0752 | 568.2354 | 2 |
| GGGGGHQ                             | 285.0752 | 568.2354 | 2 |
| GGGGGYIGSVMKDGEGRTFNLSGRNGRKFL      | 772.5814 | 3086.547 | 0 |
| GGGKKGKGRGGGGRGVRGV                 | 566.3714 | 1695.972 | 3 |
| GGGSCNKT                            | 362.2159 | 722.3018 | 0 |
| GGIVVLAIVLIFLYVV                    | 563.3897 | 1687.069 | 3 |
| GGKLVLHA                            | 794.5627 | 793.481  | 0 |
| GGKRVRP                             | 769.5065 | 768.4719 | 0 |
| GGLGGPGFGASLFPGLGGNNGMGGGGLNGLFGAGF | 760.583  | 3038.435 | 0 |
| GGMHAATGILTARGG                     | 685.4283 | 1368.693 | 2 |
| GGTHVAIAFEVP                        | 599.3867 | 1196.619 | 2 |
| GGWCS                               | 255.0648 | 508.174  | 2 |
| GHGGGKGNLTKDNESG                    | 383.167  | 1528.65  | 0 |
| GHGMLGHG                            | 383.1657 | 764.3388 | 0 |
| GHIPREIGKLSN                        | 441.279  | 1320.715 | 3 |
| GHIVTFKGC                           | 481.2348 | 960.4851 | 0 |
| GHKCGSG                             | 323.1452 | 644.27   | 2 |
| GHKCGSG                             | 323.1448 | 644.27   | 0 |
| GHKCGSG                             | 323.1462 | 644.27   | 2 |
| GHKRPIKKVKHSKS                      | 815.5584 | 1628.995 | 2 |
| GHKTIFG                             | 380.2463 | 758.4075 | 2 |
| GHMDNWSS                            | 467.1009 | 932.3447 | 2 |
| GHNKRRII                            | 497.3201 | 992.5992 | 2 |
| GHNKRRII                            | 497.3198 | 992.5992 | 2 |
| GHNNIGFS                            | 423.1955 | 844.3828 | 0 |
| GHNNTASNKHPSLN                      | 802.3647 | 1602.786 | 2 |
| GHNNNPI                             | 383.1645 | 764.3566 | 0 |
| GHNNTGVF                            | 423.1965 | 844.3828 | 0 |
| GHQHNFEKNLLKCGW                     | 453.3901 | 1809.873 | 0 |
| GHRCCWGS                            | 453.1673 | 904.3432 | 0 |
| GHRDLILG                            | 440.8135 | 879.4927 | 2 |
| GHRKQINEYALD                        | 481.9996 | 1442.727 | 3 |
| GHSSNSDYNPRSS                       | 385.1812 | 1536.619 | 0 |
| GHSTSYN                             | 383.1652 | 764.309  | 0 |
| GHSTSYN                             | 383.1667 | 764.309  | 0 |
| GHSTSYN                             | 383.1665 | 764.309  | 0 |
| GHSTSYN                             | 383.1677 | 764.309  | 0 |

|                               |          |          |   |
|-------------------------------|----------|----------|---|
| GHSTSYN                       | 383.1641 | 764.309  | 0 |
| GHSTSYN                       | 383.1654 | 764.309  | 0 |
| GHSVVTLFRF                    | 581.9034 | 1161.63  | 2 |
| GHTGPISRCCFSASGN              | 797.3348 | 1592.682 | 2 |
| GHVSGPQLWDPHDFDFGKNFG         | 786.3356 | 2356.066 | 3 |
| GIGKTYIWRTLAS                 | 733.5206 | 1464.809 | 2 |
| GIHINLKGFA                    | 535.3581 | 1068.608 | 0 |
| GIIGNYQQRNQ                   | 430.906  | 1289.648 | 3 |
| GKPKGK                        | 599.3929 | 598.3802 | 0 |
| GINSNITKRLAIRLPPS             | 925.5664 | 1849.09  | 2 |
| GIPIFH                        | 683.4321 | 682.3802 | 0 |
| GIPQGGFMLGSYCQPNKPLF          | 786.6715 | 2357.134 | 3 |
| GIRNSTSSCKRI                  | 441.279  | 1320.693 | 3 |
| GIVLIHVKN                     | 496.8749 | 991.6179 | 2 |
| GKALLGRPLR                    | 540.9018 | 1079.693 | 2 |
| GKATILAIGKAF                  | 595.4003 | 1188.723 | 2 |
| GKEAIVAGFYH                   | 596.3879 | 1190.608 | 2 |
| GKERWPNSHFVNGEHALKFPLF        | 653.4203 | 2609.329 | 0 |
| GKGKSTR                       | 733.5419 | 732.4243 | 0 |
| GKIIISAVSLILVVG               | 527.6784 | 1580.028 | 3 |
| GKKAPLRQR                     | 527.4025 | 1052.657 | 2 |
| GKKEKRH                       | 441.8127 | 881.5195 | 2 |
| GKKITDDCPNSDEIAYRVVYVTSNDAILS | 772.5836 | 3086.487 | 0 |
| GKLVHLLIAH                    | 551.3546 | 1100.646 | 0 |
| GKLVKPKYYKTIKCSITLDPK         | 808.5812 | 2422.402 | 0 |
| GKNKVS                        | 632.4734 | 631.3653 | 0 |
| GKPLPKF                       | 786.5981 | 785.48   | 0 |
| GKQSQKHLPIV                   | 617.9318 | 1233.719 | 2 |
| GKRIVHV                       | 808.5808 | 807.5079 | 0 |
| GKRIVHV                       | 808.5801 | 807.5079 | 0 |
| GKRLATY                       | 808.5796 | 807.4603 | 0 |
| GKRSTFL                       | 808.581  | 807.4603 | 0 |
| GKTAASIAASH                   | 507.3645 | 1012.53  | 2 |
| GLEILAIP                      | 413.2662 | 824.5007 | 0 |
| GLFTYLGKRTRIF                 | 786.4819 | 1570.898 | 2 |
| GLGIHHSVGEVHGVEYAFGAHDYPTSGVF | 760.5824 | 3038.431 | 0 |
| GLGIHHSVGEVHGVEYAFGAHDYPTSGVF | 760.5839 | 3038.431 | 0 |
| GLGIHHSVGEVHGVEYAFGAHDYPTSGVF | 760.5826 | 3038.431 | 0 |
| GLLGLGGGFILGPLFI              | 772.5028 | 1542.917 | 2 |
| GLLGLGGGFILGPLFI              | 772.4838 | 1542.917 | 2 |
| GLLRMNSS                      | 439.2769 | 876.4487 | 2 |
| GLNPISLLIDCAKCVASGSI          | 494.3182 | 1973.033 | 4 |
| GLNQCGSF                      | 413.2634 | 824.3487 | 0 |
| GLPLIIQFI                     | 507.3273 | 1012.632 | 0 |
| GLQEKGVALTKVPKVKF             | 461.3222 | 1841.114 | 0 |

|                                              |          |          |   |
|----------------------------------------------|----------|----------|---|
| GLRGCQKW                                     | 474.3152 | 946.4807 | 2 |
| GLRKILKKFD                                   | 609.395  | 1216.766 | 0 |
| GLSFNLIKLSFENMVAV                            | 507.3253 | 2025.097 | 0 |
| GLVIKKKGPVF                                  | 593.4408 | 1184.765 | 2 |
| GLYKLSKL                                     | 461.3294 | 920.5695 | 2 |
| GMPLPKDPSKKGNLRIKFN                          | 535.9075 | 2139.199 | 4 |
| GMRFASQAILSG                                 | 413.2646 | 1236.629 | 0 |
| GNFLKK                                       | 706.5034 | 705.4174 | 0 |
| GNLKTCSC                                     | 413.2641 | 824.3521 | 0 |
| GNPGGYGSG                                    | 383.1653 | 764.309  | 0 |
| GNPGGYGSG                                    | 383.1665 | 764.309  | 0 |
| GNTLNFS                                      | 441.2074 | 880.3926 | 0 |
| GPCPAA                                       | 258.1097 | 514.2209 | 2 |
| GDHLAALAPLSIGRTRMESAAV GALWGC GHDAGQVIFGLIFL | 1097.803 | 4387.272 | 0 |
| GPHEKRN                                      | 419.2496 | 836.4253 | 2 |
| GPHLHHI                                      | 405.7843 | 809.4296 | 2 |
| GPHLSAGAK                                    | 419.2509 | 836.4504 | 2 |
| GPIIGGPFTL                                   | 494.3195 | 986.5437 | 2 |
| GPILSH                                       | 623.4113 | 622.3439 | 0 |
| GPILSH                                       | 623.4113 | 622.3439 | 0 |
| <b>GPKALPII<sup>d</sup></b>                  | 808.579  | 807.5219 | 0 |
| <b>GPKALPII<sup>d</sup></b>                  | 808.5803 | 807.5219 | 0 |
| <b>GPKALPII<sup>d</sup></b>                  | 808.5765 | 807.5219 | 0 |
| <b>GPKALPII<sup>d</sup></b>                  | 808.5791 | 807.5219 | 0 |
| <b>GPKALPII<sup>d</sup></b>                  | 808.5786 | 807.5219 | 0 |
| GPKGILINVGR                                  | 562.3683 | 1122.687 | 2 |
| GPKGLPIL                                     | 794.5639 | 793.5062 | 0 |
| GPKKLPLIGNM                                  | 584.3805 | 1166.685 | 2 |
| GPKKPIF                                      | 786.5978 | 785.48   | 0 |
| GPKKPIF                                      | 786.5953 | 785.48   | 0 |
| GPKLQKAIDQ                                   | 549.415  | 1096.624 | 2 |
| GPKNVHV VPAASN                               | 645.4635 | 1288.689 | 2 |
| GPLGIEEGPILWAS                               | 360.3619 | 1437.75  | 0 |
| GPQPIRRTG                                    | 491.3723 | 980.5516 | 2 |
| GPQRRKRR                                     | 527.4025 | 1052.643 | 2 |
| GPRIH                                        | 579.3846 | 578.3289 | 0 |
| GPRNKYL                                      | 424.273  | 846.4712 | 2 |
| GPRNKYL                                      | 424.273  | 846.4712 | 2 |
| GPSEMVFRQCACNRTSELL                          | 535.9001 | 2139.986 | 4 |
| GQDQDNQEFPFNFSTQKISIFNKISTTMIATGYKIECCMAF    | 786.172  | 4711.174 | 6 |
| GQGG SIPSEETVKLLDMIKSGGVNLGLS                | 697.4454 | 2785.453 | 0 |
| GQGHNIKVTSFKVG                               | 491.3334 | 1470.794 | 0 |
| GQPPLAIL                                     | 808.5806 | 807.4854 | 0 |
| GQPPLAIL                                     | 808.579  | 807.4854 | 0 |
| GQPPLAIL                                     | 808.5806 | 807.4854 | 0 |

|                                    |          |          |   |
|------------------------------------|----------|----------|---|
| GQPPLAIL                           | 808.5801 | 807.4854 | 0 |
| GQQLRPGAAGQGLTLPARGGCGRGAPADEVAAAG | 808.5803 | 3230.633 | 0 |
| GRGGAGSKRSRAAEVHNLS                | 637.4256 | 1908.999 | 0 |
| GRGTPRGAATKAC                      | 623.4101 | 1244.641 | 0 |
| GRGTPRGAATKAC                      | 623.4108 | 1244.641 | 0 |
| GRGVPPV                            | 681.4513 | 680.397  | 0 |
| GRHRCEHICHVGPC                     | 802.3647 | 1602.708 | 2 |
| GRNAIETFN                          | 511.3155 | 1020.499 | 2 |
| GRRGSLHLIRAS                       | 661.9583 | 1321.769 | 2 |
| GRSLGRPEGVLINGKTAK                 | 618.4541 | 1852.064 | 0 |
| GRSLGRPEGVLINGKTAK                 | 618.455  | 1852.064 | 0 |
| GRVKIRGIKIEL                       | 691.4706 | 1380.893 | 2 |
| GRYKLSSQA                          | 505.3488 | 1008.535 | 0 |
| GRYQWKDG                           | 505.3503 | 1008.478 | 2 |
| GSFGRTFCKCWAC                      | 367.1716 | 1464.61  | 0 |
| GSGLLVGYWPAYLFS                    | 544.0082 | 1628.824 | 3 |
| GSGNGNSSAYPSSYGSSEYDTMQYN          | 656.5271 | 2622.009 | 0 |
| GSKKGGGSLFSASAFDAIDDDADGEVVDDKN    | 772.582  | 3086.395 | 0 |
| GSKRRKN                            | 423.361  | 844.4991 | 0 |
| GSKRRKN                            | 423.3625 | 844.4991 | 0 |
| GSKRRKN                            | 423.3555 | 844.4991 | 2 |
| GSKRRKN                            | 423.3611 | 844.4991 | 0 |
| GSKRRKN                            | 423.3616 | 844.4991 | 0 |
| GSLLRGLLLLL                        | 584.3801 | 1166.775 | 2 |
| GSLMFFIGGLTNL                      | 685.4353 | 1368.711 | 0 |
| GSPGHS                             | 271.0602 | 540.2292 | 2 |
| GSPRRFMRT                          | 554.3709 | 1106.577 | 2 |
| GSRRKNK                            | 423.3621 | 844.4991 | 0 |
| GSRRRLRVF                          | 573.9063 | 1145.69  | 2 |
| GSSRGQSDNFPVNTPSWASSNEIISSEHSA     | 859.5993 | 3434.525 | 0 |
| GSSTSIPGGNFSLNPPAAPTGT             | 533.4507 | 2130.023 | 0 |
| GSSTSIPGGNFSLNPPAAPTGT             | 533.4516 | 2130.023 | 0 |
| GSVKFHRFSKLQLEK                    | 959.5653 | 1917.059 | 0 |
| GSVLSVAASRGELKLG                   | 772.5242 | 1542.873 | 2 |
| GSWVKRKKVVG                        | 686.4485 | 1370.851 | 2 |
| GTHEYLAPEIIKGEGHGAAVDWWTFGVF       | 772.5815 | 3086.493 | 0 |
| GTKAERFILGKKNKGGGVRK               | 767.4547 | 2299.371 | 0 |
| GTPALKRRTVI                        | 606.3938 | 1210.751 | 2 |
| GTRKR                              | 617.4037 | 616.3769 | 0 |
| GTRSPTKKRIK                        | 636.4635 | 1270.783 | 2 |
| GTSNNSKSS                          | 441.2069 | 880.3886 | 0 |
| GTSQRDDTAMSGTDQALSSSEDSRN          | 676.4967 | 2702.132 | 0 |
| GVALGVNTSYVSG                      | 612.4135 | 1222.619 | 2 |
| GVGPLLKLK                          | 519.399  | 1036.701 | 0 |
| GVKEFEARW                          | 561.3951 | 1120.567 | 0 |



|                                   |          |          |   |
|-----------------------------------|----------|----------|---|
| GVKRAS                            | 617.4037 | 616.3657 | 0 |
| GVKRLLVP                          | 441.3724 | 880.5858 | 0 |
| GVKRLLVP                          | 441.3726 | 880.5858 | 0 |
| GVKRLLVP                          | 441.3714 | 880.5858 | 0 |
| GVLGQQLKA                         | 457.3395 | 912.5392 | 2 |
| GVLGSDLCTEDGVCTREGDAELNGDVGFDS    | 772.583  | 3086.308 | 0 |
| GVMNKRVKQ                         | 530.4023 | 1058.602 | 0 |
| GVMNKRVKQ                         | 530.4023 | 1058.602 | 0 |
| GVMNKRVKQ                         | 530.4029 | 1058.602 | 0 |
| GVNKVVAAANKAANTARDAAVKAVQ         | 813.462  | 2437.34  | 0 |
| GVRGINYYNELQTDTSIAIEAKLMKR        | 746.5674 | 2982.56  | 0 |
| GVTVKILLLWLNIVKVYRQ               | 752.5138 | 2254.393 | 0 |
| GVVGLKLLGK                        | 983.7097 | 982.6539 | 0 |
| GVVLYEILTG                        | 532.3572 | 1062.596 | 2 |
| GVVPLWAGVVITAFD                   | 772.502  | 1542.845 | 2 |
| GWIGLSILLLYAVF                    | 522.3449 | 1563.907 | 3 |
| GYGGYGGSDSSYGNSGAYGTVGGRTGSAPNN   | 722.5031 | 2886.208 | 0 |
| GYKKILVLYTN                       | 656.4257 | 1310.76  | 2 |
| GYKWRKYGKKTVK                     | 821.5936 | 1640.952 | 0 |
| GYLPFGFG                          | 429.2804 | 856.4119 | 2 |
| GYLSGEKGVHYMIRGSPNESSQLEASS       | 721.504  | 2882.351 | 0 |
| GYNPPTI                           | 381.1858 | 760.3755 | 0 |
| GYNYGLTRASNYLNSYAQGYNMSPIGGYG     | 788.6058 | 3150.414 | 0 |
| GYQGYMANHMATGHGAAGLGTSEPGKANLETER | 881.6119 | 3522.605 | 0 |
| GYQKFSATPNYSS                     | 367.1727 | 1464.652 | 0 |
| GYRNDLAYLKSVDAGADLIVTQLF          | 693.4746 | 2769.47  | 0 |
| GYSGGDVKREITGVLFHQVCYVWQWK        | 764.5488 | 3054.517 | 0 |
| GYSGGDVKREITGVLFHQVCYVWQWK        | 764.5483 | 3054.517 | 0 |
| GYSHRERVRRGTR                     | 544.0082 | 1628.872 | 3 |
| GYSYQ                             | 309.2033 | 616.2493 | 2 |
| GYTITSSTSLVAIKKAICFH              | 535.9001 | 2139.14  | 4 |
| HAAEILVEFFEKS                     | 760.3215 | 1518.772 | 2 |
| HACIIHR                           | 425.2845 | 848.4439 | 0 |
| HACTSC                            | 311.1449 | 620.2047 | 0 |
| HAEYCHGPG                         | 367.1692 | 1098.419 | 0 |
| HAGCANNNDVSWCSEEVSESKAE           | 599.4826 | 2393.949 | 0 |
| HAGFNCG                           | 353.1558 | 704.27   | 0 |
| HAGFNCG                           | 353.155  | 704.27   | 0 |
| HAKCLEF                           | 424.2717 | 846.4058 | 2 |
| HAKCLEF                           | 424.2741 | 846.4058 | 2 |
| HAKNLHTL                          | 467.3139 | 932.5192 | 0 |
| HANGHANNEPGMAYQSI                 | 453.3897 | 1809.785 | 0 |
| HANGRLDKCQSIYV                    | 535.3701 | 1602.794 | 3 |
| HANNREANNTKFG                     | 369.1863 | 1472.676 | 0 |
| HANRLKSLPATFGN                    | 509.3225 | 1524.816 | 3 |

|                         |          |          |   |
|-------------------------|----------|----------|---|
| HAQDDPFYLYQYCSSNR       | 527.4275 | 2105.89  | 0 |
| HAQGSKMGPSSS            | 397.1822 | 1188.519 | 0 |
| HARIFYDFARRRFA          | 609.4097 | 1824.965 | 3 |
| HASGNYG                 | 353.1546 | 704.2878 | 0 |
| HATNKTS                 | 380.2452 | 758.3559 | 2 |
| HAVGCSNKFF              | 555.2747 | 1108.513 | 0 |
| HAVGCSNKFF              | 555.2745 | 1108.513 | 0 |
| HAVGCSNKFF              | 555.2704 | 1108.513 | 0 |
| HAVLVETSIHISLLKASYHTSRQ | 648.4639 | 2589.403 | 0 |
| HCTTVLFNTEQRLYDSKLF     | 772.3166 | 2314.142 | 3 |
| HDDSKLPSNPEEVEDLRRDS    | 585.4707 | 2338.067 | 0 |
| HDNNHP                  | 367.1712 | 732.2939 | 0 |
| HDNNKRV                 | 441.8273 | 881.4468 | 2 |
| HDNRIHTVSRS             | 441.279  | 1320.665 | 3 |
| HDQGGNTFHGLAPLQ         | 796.3735 | 1590.754 | 2 |
| HDWASTSGPCGVTMFDEQLYA   | 772.3199 | 2313.967 | 3 |
| HEARGIF                 | 415.2111 | 828.4243 | 2 |
| HECPKQ                  | 371.2176 | 740.3276 | 0 |
| HECSPRIVHRTF            | 371.2179 | 1480.736 | 0 |
| HEKYAPLKLIMSASL         | 605.4207 | 1813.017 | 0 |
| HENAYQ                  | 381.1875 | 760.314  | 0 |
| HENSTEVPSPASMCSVCV      | 469.3839 | 1873.765 | 0 |
| HETLSWNWPPWK            | 527.6784 | 1579.757 | 3 |
| HFCFVCIMEWAKHESRPCICRQR | 720.525  | 2878.322 | 0 |
| HFLKIKEQKKYQ            | 398.325  | 1588.909 | 0 |
| HFRQQPSPNP              | 441.2072 | 1320.632 | 0 |
| HGDGQC                  | 309.1293 | 616.1911 | 2 |
| HGDRTQQCA               | 339.1396 | 1014.43  | 0 |
| HGEAGKTAIVI             | 548.3424 | 1094.608 | 2 |
| HGEGNTF                 | 381.1859 | 760.314  | 0 |
| HGEGNTF                 | 381.1873 | 760.314  | 0 |
| HGFMTPKK                | 473.3407 | 944.4902 | 0 |
| HGGMALETQGF             | 383.1679 | 1146.513 | 0 |
| HGGMALETQGF             | 383.1644 | 1146.513 | 0 |
| HGKGGSC                 | 323.145  | 644.27   | 2 |
| HGKNYGSS                | 425.2106 | 848.3777 | 0 |
| HGKVKNELGN              | 548.3516 | 1094.583 | 2 |
| HGLRFAVVVARF            | 686.4493 | 1370.794 | 2 |
| HGNATENTDGDSEKES        | 423.3768 | 1689.671 | 0 |
| HGNKISL                 | 441.3091 | 880.5131 | 2 |
| HGNKKISLV               | 498.4093 | 994.5923 | 2 |
| HGNKKLENAYEDA           | 497.2328 | 1488.684 | 0 |
| HGNKNRR                 | 441.3132 | 880.474  | 2 |
| HGNNDFFDHDYDDTPPH       | 511.4313 | 2041.783 | 0 |
| HGNSINR                 | 399.2754 | 796.394  | 2 |

|                               |          |          |   |
|-------------------------------|----------|----------|---|
| HGQQEKWFNNFHENLD              | 511.4308 | 2041.903 | 0 |
| HGRERSPIPYTGSL                | 425.2122 | 1696.865 | 0 |
| HGRGGGALSGT                   | 485.353  | 968.4788 | 2 |
| HGRNARLYIIIAIVLTLILCL         | 595.3767 | 2377.44  | 0 |
| HGSCTSCCKCA                   | 367.17   | 1098.372 | 0 |
| HGSWGKLGGGDGDEEQGG            | 468.3878 | 1869.788 | 0 |
| HGSWGKLGGGDGDEEQGG            | 468.3876 | 1869.788 | 0 |
| HHSFRTKKTFSPFIMKTRRSCR        | 963.5959 | 2887.508 | 0 |
| HHSSSTNPGFLDALRSG             | 935.4463 | 1868.877 | 2 |
| HHHHSRH                       | 518.8427 | 1035.548 | 2 |
| HIMSLAKSF                     | 517.3688 | 1032.543 | 0 |
| HIQPRYCLKCG                   | 439.8961 | 1316.648 | 3 |
| HIRNSPPPQ                     | 523.3565 | 1044.547 | 2 |
| HIRPGTTTLNIVIH                | 786.507  | 1570.894 | 2 |
| HITDIVPYTGQCQEEEEEEESDN       | 941.7005 | 2822.135 | 0 |
| HKNSGMIF                      | 467.3138 | 932.4538 | 0 |
| HLACKYL                       | 424.2704 | 846.4422 | 2 |
| HLENLRNQLNKC                  | 494.6469 | 1480.757 | 3 |
| HLKTIRQGA                     | 576.4098 | 1150.694 | 0 |
| HLKTLKPFQKF                   | 737.4986 | 1472.85  | 0 |
| HLLKITGKGVRC                  | 691.4508 | 1380.802 | 2 |
| HLMIIIYS                      | 495.3898 | 988.5416 | 0 |
| HLNGAEGYA                     | 311.1435 | 930.4196 | 0 |
| HLNNVNKNDGGTAQNAGS            | 453.389  | 1809.835 | 0 |
| HLPIHLAGKRGHVE                | 782.5003 | 1562.879 | 2 |
| HLPIHLAGKRGHVE                | 782.4903 | 1562.879 | 2 |
| HLQDSAF                       | 409.1613 | 816.3766 | 0 |
| HLQHKVRN                      | 516.386  | 1030.579 | 0 |
| HLSMIFLVF                     | 338.3417 | 1349.669 | 0 |
| HLYIVELIRAGIF                 | 772.5015 | 1542.892 | 2 |
| HMQSQAAGANGLVEGAVMESSGTENCQRN | 992.7431 | 2975.292 | 0 |
| HNHFPQAYNLCLHGLFGLF           | 772.3166 | 2314.111 | 3 |
| HNINASALRTMK                  | 678.4592 | 1354.714 | 2 |
| HNNNNNNNNNSNCSSGYSSYGG        | 555.4573 | 2217.8   | 0 |
| HNPEFRRYADCSA                 | 783.3462 | 1564.684 | 2 |
| HNRLKLRISRMF                  | 786.5011 | 1570.888 | 2 |
| HNSNTSFV                      | 453.2078 | 904.4039 | 0 |
| HNSNTSFV                      | 453.1668 | 904.4039 | 0 |
| HPALVK                        | 664.4626 | 663.4068 | 0 |
| HPARVPMWK                     | 561.395  | 1120.596 | 0 |
| HPCCAM                        | 339.1404 | 676.2131 | 2 |
| HPKPQAAK                      | 438.787  | 875.4977 | 2 |
| HPPPPPIQEP                    | 632.9174 | 1263.672 | 2 |
| HPSSSM                        | 323.1454 | 644.2588 | 2 |
| HPSSSM                        | 323.1453 | 644.2588 | 2 |

|                               |          |          |   |
|-------------------------------|----------|----------|---|
| HPTLDS                        | 335.2181 | 668.3129 | 0 |
| HQNQAY                        | 381.1869 | 760.314  | 0 |
| HRHNGVSALV                    | 545.3703 | 1088.584 | 2 |
| HRIAPIVSLSG                   | 575.4085 | 1148.667 | 0 |
| HRRVYERRKR                    | 728.4972 | 1454.844 | 2 |
| HSGMANSTRSRSPISPRRTHNAIGSNEH  | 765.1543 | 3056.482 | 0 |
| HSNNNIA                       | 385.1807 | 768.3514 | 0 |
| HSQHINMHYA                    | 413.2647 | 1236.546 | 0 |
| HTKDDAELLVEK                  | 699.405  | 1396.72  | 0 |
| HTKGCKCPPGFRGDGVHSC           | 497.2342 | 1984.882 | 0 |
| HTKKVILDTAKR                  | 705.5084 | 1408.851 | 0 |
| HTNELLLGKALKGGV               | 388.2536 | 1548.899 | 0 |
| HTNKSGGF                      | 424.2725 | 846.3984 | 2 |
| HTNKSGGF                      | 424.2713 | 846.3984 | 2 |
| HTNRHRTGAK                    | 393.2857 | 1176.622 | 0 |
| HTQNSIDF                      | 481.2374 | 960.4301 | 0 |
| HTSEVSKEDNSGKSSNNLN           | 512.4134 | 2045.925 | 0 |
| HTVCTSFS                      | 441.2663 | 880.3749 | 2 |
| HTYAKLA                       | 402.2576 | 802.4337 | 2 |
| HVATSTDS                      | 409.1623 | 816.3614 | 0 |
| HVFEPH                        | 383.1672 | 764.3606 | 0 |
| HVFKKNPKAPI                   | 639.9449 | 1277.761 | 2 |
| HVGSFSQ                       | 381.1862 | 760.3504 | 0 |
| HVILGRTVEVKKAIPRSEQ           | 540.8618 | 2159.254 | 4 |
| HVKELKRQTSLIAE                | 551.3677 | 1650.942 | 3 |
| HVKLSNLCNSHIMD                | 425.2136 | 1696.803 | 0 |
| HVKLSNLCNSHIMD                | 425.2114 | 1696.803 | 0 |
| HVKPV                         | 579.3829 | 578.354  | 0 |
| HVLRQFYRECD                   | 367.1704 | 1464.693 | 0 |
| HVNEVEGLQIKK                  | 465.2966 | 1392.773 | 3 |
| HVNNDDVVSATC                  | 425.2122 | 1272.54  | 0 |
| HVNNDDVVSATC                  | 425.2129 | 1272.54  | 0 |
| HVNSKYCI                      | 482.3031 | 962.4644 | 2 |
| HVNVVRLGFCADGFH               | 595.3783 | 1782.899 | 0 |
| HVPAVVMQ                      | 441.2631 | 880.4477 | 2 |
| HVQAGQCGNQIGGKFWVMCDEHGIDATG  | 772.5821 | 3086.343 | 0 |
| HVSKNLRKGG                    | 548.3508 | 1094.631 | 2 |
| HVSNNVVVMFAG                  | 425.2133 | 1272.629 | 0 |
| HVSNNVVVMFAG                  | 425.2123 | 1272.629 | 0 |
| HVVANLT                       | 753.4716 | 752.4181 | 0 |
| HVYVFGGC                      | 441.2627 | 880.3901 | 2 |
| IAATLVGLQSVPLII               | 522.346  | 1563.96  | 3 |
| IADEHVGHDDFYNTKEASHMPSPGTAGLF | 786.5986 | 3142.409 | 0 |
| IADLLREYVDSGDTLEACRCIRELGVSF  | 786.5978 | 3142.543 | 0 |
| IAIGRIQIVPRFA                 | 485.3379 | 1452.893 | 3 |

|                              |          |          |   |
|------------------------------|----------|----------|---|
| IAKAAGILRARLGRKNTEQKDN       | 808.5791 | 2422.388 | 0 |
| <b>IAKKLVLP<sup>d</sup></b>  | 441.3728 | 880.611  | 0 |
| <b>IAKKLVLP<sup>d</sup></b>  | 441.3731 | 880.611  | 0 |
| <b>IAKKLVLP<sup>d</sup></b>  | 441.3731 | 880.611  | 0 |
| <b>IAKKLVLP<sup>d</sup></b>  | 441.3731 | 880.611  | 0 |
| IAKKSJGG                     | 788.6034 | 787.4916 | 0 |
| IALSRSRERRKR                 | 764.5496 | 1526.923 | 0 |
| IAPLPPGWEKRSDAVTGK           | 961.5816 | 1921.042 | 0 |
| IARKDLVPFDPGFPFKF            | 499.2473 | 1993.083 | 0 |
| IARNLLASSFVVTL               | 752.4873 | 1502.882 | 2 |
| IASVKLRIQTFKGFVKKQ           | 560.4126 | 2237.341 | 0 |
| ICLRDRLVTL                   | 601.4376 | 1200.701 | 2 |
| IDCGNSYYMPPKPRPSTCN          | 536.486  | 2141.933 | 0 |
| IDETLTSDPVNYT                | 734.3203 | 1466.678 | 2 |
| IDFPVGGK                     | 473.3423 | 944.5331 | 0 |
| IDLNNTDQIKREI                | 786.3582 | 1570.832 | 2 |
| IDTDSGRGVDTSNSEYM            | 462.4493 | 1845.769 | 0 |
| IEKWILRR                     | 557.4118 | 1112.682 | 2 |
| IEKWILRR                     | 557.4118 | 1112.682 | 2 |
| IEPGLKVPL                    | 483.3757 | 964.5957 | 2 |
| IEPNLKHYGCVI                 | 693.3795 | 1384.717 | 2 |
| IETLRERVF                    | 581.9031 | 1161.651 | 2 |
| IFADNSNL                     | 447.3059 | 892.4291 | 0 |
| IFALSLSLIPTVLAATA            | 605.4211 | 1813.096 | 0 |
| IFILRPQS                     | 487.326  | 972.5756 | 2 |
| IFIQEAKEYSFHLVQPGFHWIRLYF    | 760.5838 | 3038.596 | 0 |
| IFIRKKAERRAL                 | 786.6035 | 1570.978 | 2 |
| IFKDKKVIFGLP                 | 760.4844 | 1518.917 | 2 |
| IFKSIFCLPCLLF                | 772.5119 | 1542.834 | 2 |
| IFKSPLDLLIKSG                | 772.4872 | 1542.939 | 2 |
| IFLRSLKVKKALVKS              | 577.3688 | 1729.134 | 0 |
| IFLVYIFSFLRN                 | 766.5302 | 1530.86  | 0 |
| IFMMYGAYSTTRRSVSRIF          | 786.3359 | 2356.182 | 3 |
| IFPTSLKKTG                   | 546.3992 | 1090.639 | 0 |
| IFPTSLKKTG                   | 546.3964 | 1090.639 | 2 |
| IFSKPCSPSRLCPFQLCVFDTKQVLSSG | 772.5837 | 3086.539 | 0 |
| IFTCSFTPGSCSLTAYSLTFPPIMRRFR | 800.6101 | 3198.582 | 0 |
| IFTVLK                       | 720.5248 | 719.4582 | 0 |
| IFVYPTKN                     | 491.3724 | 980.5331 | 2 |
| IFYKYN                       | 424.2717 | 846.4276 | 2 |
| IGAPPVIVLSSACA               | 433.2907 | 1296.711 | 0 |
| IGKVLLSLVSFFF                | 711.4624 | 1420.869 | 0 |
| IGLLAVPFLEN                  | 593.441  | 1184.681 | 2 |
| IGLLVKKFLIKINRN              | 590.4257 | 1768.145 | 0 |
| IGNLTKRHH                    | 538.3438 | 1074.605 | 2 |

|                                |          |          |   |
|--------------------------------|----------|----------|---|
| IGSGKKNRKR                     | 572.4003 | 1142.7   | 2 |
| IGTPISRSS                      | 459.3455 | 916.4978 | 2 |
| IGVILRDSH                      | 505.3503 | 1008.572 | 2 |
| IHACDYK                        | 425.2113 | 848.3851 | 0 |
| IHCEDPTAIRKCPNNFA              | 483.2178 | 1928.887 | 0 |
| IHGDSEMG                       | 423.1962 | 844.3385 | 0 |
| IHGLIVLLKKVT                   | 667.4776 | 1332.886 | 2 |
| IHGMMGGVGKSTLARAVYNLHTDH       | 609.3947 | 2433.234 | 0 |
| IHIARTGWFGAGLV                 | 749.5216 | 1496.825 | 2 |
| IHKLLKPH                       | 493.3847 | 984.6233 | 0 |
| IHLACKKGHVRVIN                 | 794.564  | 1586.919 | 0 |
| IHLGTISGLGSS                   | 381.1863 | 1140.614 | 0 |
| IIALSTIVLVGV                   | 599.3932 | 1196.774 | 0 |
| IIDPAIGLASTTLTSLSGFDKFV        | 760.3191 | 2278.246 | 3 |
| IIDVIVH                        | 808.5809 | 807.4854 | 0 |
| IIIVPRNSMSKDF                  | 760.4857 | 1518.823 | 2 |
| IIKKTPVVVGN                    | 584.3698 | 1166.739 | 2 |
| IIRALVGIISH                    | 596.3898 | 1190.75  | 2 |
| <b>IIRCTGC<sup>d</sup></b>     | 383.1669 | 764.3673 | 0 |
| <b>IIRCTGC<sup>d</sup></b>     | 383.1652 | 764.3673 | 0 |
| <b>IIRCTGC<sup>d</sup></b>     | 383.166  | 764.3673 | 0 |
| <b>IIRCTGC<sup>d</sup></b>     | 383.1665 | 764.3673 | 0 |
| <b>IIRCTGC<sup>d</sup></b>     | 383.1668 | 764.3673 | 0 |
| <b>IIRCTGC<sup>d</sup></b>     | 383.1668 | 764.3673 | 2 |
| <b>IIRCTGC<sup>d</sup></b>     | 383.1663 | 764.3673 | 0 |
| <b>IIRCTGC<sup>d</sup></b>     | 383.1665 | 764.3673 | 0 |
| <b>IIRCTGC<sup>d</sup></b>     | 383.1644 | 764.3673 | 0 |
| <b>IIRCTGC<sup>d</sup></b>     | 383.1654 | 764.3673 | 0 |
| <b>IIRCTGC<sup>d</sup></b>     | 383.1652 | 764.3673 | 0 |
| IISPGARQGLIPLAIP               | 808.5795 | 1614.982 | 0 |
| IITGKFPSQY                     | 385.2911 | 1152.618 | 0 |
| IITLELLSTH                     | 570.3698 | 1138.66  | 2 |
| IIVYLVELLK                     | 601.9441 | 1201.769 | 2 |
| IITYTLVLI                      | 474.3148 | 946.6103 | 2 |
| IKAALARR                       | 449.8242 | 897.5872 | 2 |
| IKAHVPLRFA                     | 576.3879 | 1150.698 | 2 |
| IKELPASIGSL                    | 564.3589 | 1126.66  | 0 |
| IKFKVGTQI                      | 517.37   | 1032.633 | 0 |
| IKGMKGNRAF                     | 561.3962 | 1120.618 | 0 |
| IKGQWNKEEDRKLIRLVKQ            | 794.5633 | 2380.37  | 0 |
| IKHKLGNMASI                    | 606.3938 | 1210.686 | 2 |
| IKKRVFSKWDQVKDPEPEPESESESKSTVN | 876.659  | 3502.758 | 0 |
| IKKSAKVRT                      | 515.8644 | 1029.666 | 2 |
| IKLGVLVEGLHKRCS                | 551.3589 | 1650.96  | 3 |
| IKLLCSQVRF                     | 603.9162 | 1205.695 | 2 |

|                                          |          |          |   |
|------------------------------------------|----------|----------|---|
| IKLLRHADKN                               | 604.4217 | 1206.72  | 2 |
| IKNALVRAGAKH                             | 639.4431 | 1276.773 | 2 |
| IKNAVGRP                                 | 427.8114 | 853.5134 | 2 |
| IKSKLSIGGTA                              | 537.8771 | 1073.644 | 2 |
| IKSKLSIGGTA                              | 537.8772 | 1073.644 | 2 |
| IKTFFPVEATSTSFQSYPPAPDLGHQDLRLSLQS       | 969.732  | 3874.942 | 0 |
| ILALIVSVRPKN                             | 661.9582 | 1321.845 | 2 |
| ILALIWWKK                                | 635.412  | 1268.801 | 0 |
| ILALIWWKK                                | 635.414  | 1268.801 | 0 |
| ILCDIDIILLMFAPNGKPSLCRGRHSNF             | 786.5979 | 3142.624 | 0 |
| ILELLLQIPL                               | 582.874  | 1163.753 | 2 |
| ILGLAKKN                                 | 428.8013 | 855.5542 | 2 |
| ILGVPKLRATRTVF                           | 786.0116 | 1569.972 | 2 |
| ILGVPKLRATRTVF                           | 786.0134 | 1569.972 | 2 |
| ILGVPKLRATRTVF                           | 786.0121 | 1569.972 | 2 |
| ILGVPKLRATRTVF                           | 786.0121 | 1569.972 | 2 |
| ILHEISPASNNSE                            | 749.3179 | 1496.711 | 2 |
| ILKKNNSF                                 | 482.3006 | 962.5549 | 2 |
| ILKKNNSF                                 | 482.3076 | 962.5549 | 2 |
| ILKPVFTQR                                | 551.3518 | 1100.671 | 0 |
| ILLGVVF                                  | 760.5826 | 759.4894 | 0 |
| ILLQGHLLGR                               | 638.4378 | 1274.794 | 2 |
| ILQRLLEREKAANMDEERGEPEKY                 | 794.5638 | 3174.562 | 0 |
| ILRIVF                                   | 760.5831 | 759.5007 | 0 |
| ILRLTKN                                  | 429.2805 | 856.5494 | 2 |
| ILRTGKSIN                                | 501.3514 | 1000.603 | 2 |
| ILSAISNK                                 | 423.3612 | 844.5018 | 0 |
| ILSGPMQSVGNHGGRRNPD                      | 975.4387 | 1948.917 | 2 |
| ILSLVIPDK                                | 499.3707 | 996.6219 | 2 |
| ILSRPKLSSAISLN                           | 500.315  | 1497.888 | 3 |
| ILSWVLNVSKVLK                            | 500.3179 | 1497.928 | 3 |
| ILSWVLNVSKVLK                            | 500.3179 | 1497.928 | 3 |
| ILSWVLNVSKVLK                            | 500.315  | 1497.928 | 3 |
| ILSWVLNVSKVLK                            | 500.315  | 1497.928 | 3 |
| ILTLFTSS                                 | 441.2957 | 880.4906 | 0 |
| ILTLFTSS                                 | 441.2972 | 880.4906 | 0 |
| ILTLFTSS                                 | 441.2999 | 880.4906 | 2 |
| ILTLKYPIEHGIVSN                          | 566.3714 | 1695.956 | 3 |
| ILVLSRTN                                 | 458.3033 | 914.5549 | 2 |
| ILVPGHRYILISFRHVEKLRKLLLEEEKNKEATGVVLETK | 943.5485 | 4712.722 | 5 |
| ILVPRWWNN                                | 599.3914 | 1196.646 | 0 |
| ILVVDALYIG                               | 538.3438 | 1074.632 | 2 |
| IMLVFLLNF                                | 603.9162 | 1205.688 | 2 |
| IMSLDS                                   | 333.1674 | 664.3102 | 2 |
| INALKGVC RMS                             | 596.3898 | 1190.626 | 2 |

|                                    |          |          |   |
|------------------------------------|----------|----------|---|
| INLSHCS                            | 387.1799 | 772.3538 | 2 |
| INSKAGKKIFS                        | 596.908  | 1191.698 | 2 |
| INVNIDSRDVA                        | 608.3836 | 1214.626 | 0 |
| INVVRLGKYCAKGIHRALVYNFFPNGSLQSIIFP | 955.754  | 3819.081 | 0 |
| INYKLMKK                           | 519.3917 | 1036.61  | 2 |
| IPAAAQSPALISH                      | 638.4367 | 1274.698 | 2 |
| IPAAAQSPALISH                      | 638.4378 | 1274.698 | 2 |
| IPAAAQSPALISH                      | 638.4378 | 1274.698 | 2 |
| IPAAAQSPALISH                      | 638.4378 | 1274.698 | 2 |
| IPAAAQSPALISH                      | 638.4378 | 1274.698 | 2 |
| IPALKRKR                           | 491.3723 | 980.6607 | 2 |
| IPCQRFALNIF                        | 441.2976 | 1320.701 | 0 |
| IPDGHRA                            | 383.1657 | 764.3929 | 0 |
| IPETFSSST                          | 441.2067 | 880.4178 | 0 |
| IPFLWHVF                           | 529.8806 | 1057.575 | 2 |
| IPGDNFC                            | 383.1666 | 764.3163 | 0 |
| IPGIDIHLN                          | 496.3276 | 990.5498 | 2 |
| IPKLVRLGPLEHT                      | 529.3612 | 1584.972 | 3 |
| IPKYLRKKLA                         | 615.4544 | 1228.802 | 2 |
| IPLDGRFIRKCKQ                      | 795.4202 | 1588.887 | 2 |
| IPLISNGAHAIGL                      | 638.4367 | 1274.735 | 2 |
| IPLPELQGLKTL                       | 661.4837 | 1320.802 | 0 |
| IPLVMFIGVN                         | 551.893  | 1101.626 | 2 |
| IPNDHCLTLLPLVDS                    | 413.2641 | 1648.85  | 0 |
| IPNIWFFFQFLGSTT                    | 455.3122 | 1816.919 | 0 |
| IPNLFSC                            | 397.1809 | 792.384  | 0 |
| IPNNFHLKGV                         | 569.8592 | 1137.63  | 2 |
| IPPLVISGSM                         | 507.3359 | 1012.563 | 2 |
| IPPPKCLKRK                         | 610.9236 | 1219.813 | 2 |
| IPQFYPNYFTTTHDLSEYPVPLLNGG         | 746.5642 | 2982.444 | 0 |
| IPRGKGRAC                          | 479.3268 | 956.5338 | 2 |
| IPRNNFVGQVPIGTHI                   | 441.2965 | 1760.969 | 0 |
| IPRSSNSSN                          | 481.2391 | 960.4625 | 0 |
| IPSPSEKGLLASCKTLRHVKQIHAQ          | 686.1771 | 2740.517 | 0 |
| IQKDPLILSRIS                       | 691.9681 | 1381.829 | 2 |
| IQLPSGVKKLI                        | 598.3967 | 1194.77  | 2 |
| IRGKQNGKPKGS                       | 635.4152 | 1268.731 | 2 |
| IRGNKGYRISS                        | 625.9298 | 1249.689 | 2 |
| IRLAKQTEKFK                        | 681.4926 | 1360.819 | 2 |
| IRLLAKRNADNR                       | 720.4721 | 1438.848 | 2 |
| IRQLQSTQ                           | 487.329  | 972.5352 | 2 |
| IRSFIFL                            | 504.8725 | 1007.617 | 2 |
| IRVQNSRQADVVF                      | 511.3525 | 1530.827 | 3 |
| IRVTTHCRR                          | 571.4282 | 1140.63  | 2 |
| IRVTTHCRR                          | 571.4282 | 1140.63  | 2 |



|                                     |          |          |   |
|-------------------------------------|----------|----------|---|
| IRYRLWRN                            | 588.8909 | 1175.668 | 2 |
| ISDNVRSKASELTKLLSH PQSF             | 615.1352 | 2456.302 | 0 |
| ISFQNGFA                            | 295.1497 | 882.4236 | 0 |
| ISIFNKIS                            | 461.3176 | 920.5331 | 2 |
| ISKQNCT                             | 397.1832 | 792.38   | 0 |
| ISKQNCT                             | 397.1818 | 792.38   | 0 |
| ISLHRR                              | 781.4693 | 780.4719 | 0 |
| ISPDDDFRETSIHSLQ                    | 682.6306 | 2044.949 | 3 |
| ISPRVRVRACVAS                       | 707.4881 | 1412.804 | 0 |
| ISRIMKKALPPN                        | 684.4717 | 1366.812 | 2 |
| ISRPFKKRKN                          | 694.4474 | 1386.821 | 2 |
| ITAKSIPSH                           | 477.3178 | 952.5342 | 0 |
| ITGNKRPSH                           | 505.3503 | 1008.546 | 2 |
| ITRPPSA                             | 371.2272 | 740.4181 | 2 |
| ITVLIDRSLKVE                        | 750.0111 | 1497.913 | 2 |
| IVAACKMS                            | 424.2741 | 846.4997 | 2 |
| IVAACKMS                            | 424.2741 | 846.4997 | 2 |
| IVAHRLSTVRN                         | 633.4165 | 1264.737 | 2 |
| IVDCIVQMIKCKVGSIKSGWRSVFMIF         | 772.5819 | 3086.631 | 0 |
| IVDKQRLLIKK                         | 677.4432 | 1352.887 | 2 |
| IVEAHAW                             | 413.2641 | 824.4181 | 0 |
| IVGVVGSCHS                          | 522.8693 | 1043.507 | 2 |
| IVIKDMLNHH                          | 407.2381 | 1218.654 | 0 |
| IVILGVF                             | 760.5825 | 759.4894 | 0 |
| IVIYKPPFSRRTWLYGYMNRDRDYELENGLALFGS | 1092.845 | 4367.231 | 0 |
| IVKDIVSKNVIVQ                       | 727.998  | 1453.887 | 2 |
| IVKKRKPYYH                          | 653.4205 | 1304.783 | 0 |
| IVKTLNASVTQHTLEIHFYWAGKGTGIPTR      | 860.6639 | 3438.841 | 0 |
| IVLLQGLK                            | 997.6873 | 996.6583 | 0 |
| IVLVIAVKVILICVRRRN                  | 746.5658 | 2236.375 | 0 |
| IVPCYGRDYGRIMEDPKGNNLRGVGNF         | 760.5829 | 3038.522 | 0 |
| IVPGNNNSF                           | 481.2386 | 960.4665 | 0 |
| IVTYNILLRAF                         | 661.9583 | 1321.776 | 2 |
| IVVIAVF                             | 760.583  | 759.4894 | 0 |
| IVVMQKLG                            | 444.3045 | 886.531  | 2 |
| IWNCLRDGDFEEEEVWAVF                 | 786.3332 | 2356.047 | 3 |
| IWNCLRDGDFEEEEVWAVF                 | 786.3396 | 2356.047 | 3 |
| IWNCLRDGDFEEEEVWAVF                 | 786.3396 | 2356.047 | 3 |
| IWNCLRDGDFEEEEVWAVF                 | 786.3396 | 2356.047 | 3 |
| IWNCLRDGDFEEEEVWAVF                 | 786.3353 | 2356.047 | 3 |
| IWNCLRDGDFEEEEVWAVF                 | 786.3353 | 2356.047 | 3 |
| IWNCLRDGDFEEEEVWAVF                 | 786.3445 | 2356.047 | 3 |
| IWNCLRDGDFEEEEVWAVF                 | 786.3445 | 2356.047 | 3 |
| IWNCLRDGDFEEEEVWAVF                 | 786.3375 | 2356.047 | 3 |
| IWNCLRDGDFEEEEVWAVF                 | 786.3359 | 2356.047 | 3 |

|                                  |          |          |   |
|----------------------------------|----------|----------|---|
| IWNCLRDGDFEEEEVWAVF              | 786.3359 | 2356.047 | 3 |
| IWNCLRDGDFEEEEVWAVF              | 786.3359 | 2356.047 | 3 |
| IWNCLRDGDFEEEEVWAVF              | 786.3393 | 2356.047 | 3 |
| IWNCLRDGDFEEEEVWAVF              | 786.3392 | 2356.047 | 3 |
| IYGANCPQW                        | 351.1755 | 1050.459 | 0 |
| IYLADRRSTG                       | 576.3834 | 1150.61  | 2 |
| IYLVQLLN                         | 488.3311 | 974.5801 | 2 |
| IYNGS                            | 277.1797 | 552.2544 | 2 |
| IYNGS                            | 277.1796 | 552.2544 | 2 |
| IYSFYKDIENSS                     | 367.1709 | 1464.677 | 0 |
| IYSFYKDIENSS                     | 367.1708 | 1464.677 | 0 |
| KAHSVL                           | 725.4802 | 724.4232 | 0 |
| KAALPRGT                         | 813.5314 | 812.4868 | 0 |
| KAARGRP                          | 755.4871 | 754.4562 | 0 |
| KAATNFPANK                       | 430.9041 | 1289.637 | 3 |
| KAFNKDKA                         | 461.3294 | 920.508  | 2 |
| KAFNKDKA                         | 461.3176 | 920.508  | 2 |
| KAFNKDKA                         | 461.3234 | 920.508  | 0 |
| KAFNKDKA                         | 461.3294 | 920.508  | 2 |
| KAHRLARQ                         | 490.3563 | 978.5836 | 2 |
| KAILSELRHLNQ                     | 711.504  | 1420.815 | 2 |
| KAKHQKKNKKKNKK                   | 579.3833 | 1735.106 | 0 |
| KALKQAVQ                         | 443.3029 | 884.5444 | 0 |
| KASFRKM                          | 434.3223 | 866.4796 | 0 |
| KASPPTSSPPTSPV                   | 727.4592 | 1452.746 | 0 |
| KASRVTRRKLRS                     | 729.4785 | 1456.906 | 2 |
| KASTNK                           | 648.4652 | 647.3602 | 0 |
| KASVSLGDLNVKIV                   | 771.4852 | 1540.919 | 2 |
| KAYVI                            | 593.4002 | 592.3585 | 0 |
| KCASKYNQGTGMCSTIGNNNLC           | 577.4414 | 2305.991 | 0 |
| KCGKLGNN                         | 417.292  | 832.4225 | 2 |
| KCGNIRDACKFFNTISDQA              | 533.4505 | 2129.999 | 0 |
| KDDASVNILQTCILCEKKYHNSCTKE       | 746.5672 | 2982.425 | 0 |
| KDRPYLLHTNI                      | 685.4283 | 1368.751 | 2 |
| KEKCYRDAACRGLDFMFGWYMGPLIKGEYSKT | 941.7005 | 3762.782 | 0 |
| KEKRKEGGHGGGP                    | 668.9478 | 1335.701 | 2 |
| KESLLNLRVAPHFG                   | 527.6783 | 1579.883 | 3 |
| KEVTVIEW                         | 335.2177 | 1002.539 | 0 |
| KFEQKGDKFVSKQVDNKKKKKL           | 663.4625 | 2649.533 | 0 |
| KFGAVEDVVIKGSK                   | 492.995  | 1475.835 | 3 |
| KFGQFLARTLVRQ                    | 782.5003 | 1562.905 | 2 |
| KFIIKEFKKE                       | 712.0105 | 1421.865 | 2 |
| KFIVKDRSH                        | 565.4075 | 1128.64  | 2 |
| KFKGKKW                          | 461.3176 | 920.5596 | 2 |
| KFLDISDNQDLGGSL                  | 811.4214 | 1620.8   | 2 |

|                    |          |          |   |
|--------------------|----------|----------|---|
| KFLKSGKWGI         | 582.4087 | 1162.686 | 2 |
| KFQLRKAS           | 489.3072 | 976.5818 | 2 |
| KFQPNLGSQNEVKE     | 809.4126 | 1616.816 | 2 |
| KFVPFTRHSAQTT      | 507.3263 | 1518.794 | 0 |
| KGEIFSVGKRR        | 638.9422 | 1275.741 | 2 |
| KGEIPLL            | 769.5051 | 768.4745 | 0 |
| KGFEVANK           | 490.3563 | 978.5134 | 2 |
| KGGAGKRLRKD        | 593.441  | 1184.71  | 2 |
| KGGGGPVFVGQV       | 551.391  | 1100.598 | 2 |
| KGGIQIWNW          | 551.3516 | 1100.577 | 0 |
| KGGIVKDP           | 813.5314 | 812.4756 | 0 |
| KGGKDLLLIKTKGG     | 714.4522 | 1426.887 | 2 |
| KGKGKAAAFKRR       | 659.4801 | 1316.815 | 2 |
| KGKKKFKF           | 441.8273 | 881.5487 | 2 |
| KGKKKFKF           | 441.8273 | 881.5487 | 2 |
| KGKLIGRGTFGSVFH    | 535.3588 | 1602.899 | 0 |
| KGKVHSGI           | 413.266  | 824.4868 | 0 |
| KGMLTGPVTILNWSFVRN | 678.4742 | 2032.093 | 0 |
| KGPWKRKKIKN        | 691.9694 | 1381.867 | 2 |
| KGQVNKALHFH        | 639.943  | 1277.699 | 2 |
| KGQVNKALHFH        | 639.9446 | 1277.699 | 2 |
| KGSALSVLGR         | 494.3191 | 986.5873 | 2 |
| KGSLPDGREVAVK      | 678.4593 | 1354.757 | 2 |
| KGSSDILPLVKVQLKGS  | 590.425  | 1768.046 | 0 |
| KGTFPKSCLLN        | 604.4393 | 1206.643 | 0 |
| KGTVVTGGP          | 815.512  | 814.4549 | 0 |
| KGVHVPQ            | 764.5493 | 763.4341 | 0 |
| KGVRKSNKGG         | 515.8644 | 1029.604 | 2 |
| KGVTGKQAP          | 443.3019 | 884.508  | 0 |
| KGYGLTVSGR         | 519.344  | 1036.567 | 2 |
| KHANIT             | 683.4255 | 682.3762 | 0 |
| KHCNEATY           | 483.2541 | 964.4073 | 2 |
| KHLKSL             | 725.4805 | 724.4595 | 0 |
| KIAPIQVVIVPI       | 645.4649 | 1288.848 | 2 |
| KIDKLSKVNHNKFN     | 835.5831 | 1668.968 | 2 |
| KIFLNAVKA          | 502.373  | 1002.623 | 0 |
| KIFTRCS            | 427.8114 | 853.448  | 2 |
| KIIKRVVKQK         | 620.4359 | 1238.855 | 0 |
| KIIKSH             | 725.4792 | 724.4595 | 0 |
| KIIKSH             | 725.4794 | 724.4595 | 0 |
| KIPKSLSNCTT        | 596.3547 | 1190.633 | 2 |
| KIQAAFRGLAR        | 659.4801 | 1316.768 | 2 |
| KISRKHSSRKR        | 691.9694 | 1381.838 | 2 |
| KIVKNAHK           | 469.3843 | 936.5869 | 0 |
| KIVKNAHK           | 469.3844 | 936.5869 | 0 |

|                        |          |          |   |
|------------------------|----------|----------|---|
| KIVKNAHK               | 469.3835 | 936.5869 | 0 |
| KIVKPRPVQAA            | 603.9157 | 1205.761 | 2 |
| KIVPVIIFFH             | 606.8972 | 1211.743 | 2 |
| KIVTSKKVVG             | 529.8806 | 1057.686 | 2 |
| KKALPPNGKIAK           | 632.9174 | 1263.803 | 2 |
| KKATKFAGF              | 499.3528 | 996.5756 | 2 |
| KKDARKHG               | 939.5948 | 938.541  | 0 |
| KKFIVSWK               | 518.3412 | 1034.628 | 2 |
| KKFLMKNRN              | 589.8901 | 1177.675 | 2 |
| KKFLNALGKRYQVS         | 551.3677 | 1650.957 | 3 |
| KKFRGWKKR              | 617.4026 | 1232.762 | 0 |
| KKFRPIRSS              | 559.8898 | 1117.672 | 2 |
| KKFRQNHLKMF            | 492.995  | 1475.818 | 3 |
| KKGALLRGGKAM           | 615.4544 | 1228.744 | 2 |
| KKGHEVLVQGG            | 576.3842 | 1150.646 | 2 |
| KKGSGGITIKKTGQAL       | 794.0364 | 1585.952 | 2 |
| KKGYKQTT               | 477.294  | 952.5342 | 0 |
| KKHH                   | 549.3716 | 548.3183 | 0 |
| KKILSH                 | 725.4806 | 724.4595 | 0 |
| KKIRKVVIRK             | 423.361  | 1266.898 | 0 |
| KKKIKTPV               | 941.6995 | 940.6433 | 0 |
| KKKILQHQPVLIPGTKIKALQ  | 794.5617 | 2380.505 | 0 |
| KKKKDDKKK              | 573.4016 | 1144.729 | 2 |
| KKKKDDKKK              | 573.4016 | 1144.729 | 2 |
| KKKRKKKKN              | 593.4408 | 1184.819 | 2 |
| KKKSA                  | 561.398  | 560.3646 | 0 |
| KKKTKLQSPNFH           | 728.4804 | 1454.836 | 2 |
| KKLAKKYH               | 508.3344 | 1014.634 | 2 |
| KKLRTILLGKTNSRLPHEVKMA | 925.6382 | 2773.684 | 0 |
| KKLRVYVSHKNLRVRAKAAVS  | 808.5814 | 2422.476 | 0 |
| KKNANKSS               | 438.834  | 875.4825 | 2 |
| KKNKTTNKKKDA           | 702.434  | 1402.826 | 2 |
| KKQYELKFILNKHH         | 609.4097 | 1825.036 | 3 |
| KKRIH                  | 681.4527 | 680.4446 | 0 |
| KKRKKKTY               | 540.354  | 1078.698 | 2 |
| KKRVRFA                | 452.8041 | 903.5767 | 2 |
| KKRVSHA                | 413.3217 | 824.498  | 0 |
| KKRVSHA                | 413.3241 | 824.498  | 0 |
| KKSKNPNK               | 472.3604 | 942.561  | 0 |
| KKSKNPNK               | 472.3359 | 942.561  | 2 |
| KKSKNPNK               | 472.362  | 942.561  | 0 |
| KKTKKPKL               | 485.8537 | 969.6699 | 2 |
| KKVEKKLRKLP            | 683.9714 | 1365.918 | 2 |
| KKVSKAPK               | 443.3026 | 884.5807 | 0 |
| KLAKKQVK               | 471.8371 | 941.6386 | 2 |

|                                        |          |          |   |
|----------------------------------------|----------|----------|---|
| KLAKSLDSCNPTEQHV                       | 443.3328 | 1768.878 | 0 |
| KLAQRMTN                               | 961.582  | 960.5175 | 0 |
| KLCKFV                                 | 737.4983 | 736.4305 | 0 |
| KLESLFKDLREAGYNPTTEF                   | 786.6649 | 2357.19  | 3 |
| KLFDCKQ                                | 441.2663 | 880.4477 | 2 |
| KLHKFP                                 | 769.5055 | 768.4647 | 0 |
| KLHKFP                                 | 769.5057 | 768.4647 | 0 |
| KLHLIEWSKN                             | 634.4502 | 1266.709 | 0 |
| KLLHIRVAGFV                            | 647.9318 | 1293.792 | 2 |
| KLLKSH                                 | 725.4797 | 724.4595 | 0 |
| KLLLLLPVDH                             | 580.8969 | 1159.733 | 2 |
| KLPILVYFH                              | 565.4075 | 1128.67  | 2 |
| KLPILVYFH                              | 565.4102 | 1128.67  | 2 |
| KLPIVLHFH                              | 552.3599 | 1102.665 | 2 |
| KLPIVLHFH                              | 552.3599 | 1102.665 | 2 |
| KLPLLVYFH                              | 565.4103 | 1128.67  | 2 |
| KLPPAKRK                               | 469.3596 | 936.6233 | 2 |
| KLQSVEQKQKEWPNAKNPRGEKRV CNARMKRELG    | 1009.75  | 4035.148 | 0 |
| KLRDLRLFEN                             | 652.4235 | 1302.741 | 2 |
| KLRRCCHTEIVTVGPAKKEKEKEKVK             | 760.1953 | 3036.705 | 0 |
| KLSEIRLK                               | 493.8504 | 985.6284 | 2 |
| KLTSVDGGCSLREHGLLCDEEIHARGSSIFTLEMACSS | 1013.693 | 4050.891 | 0 |
| KLVFTGVIVV                             | 537.8772 | 1073.685 | 2 |
| KLVLEKQQKK                             | 621.4098 | 1240.787 | 2 |
| KMKKK                                  | 662.4808 | 661.4309 | 0 |
| KMLIELVK                               | 487.329  | 972.6042 | 2 |
| KNEIQLRIL                              | 705.9837 | 1409.847 | 2 |
| KNGGKKNKQKNK                           | 686.4485 | 1370.811 | 2 |
| KNHISVPCPKVADVMLVGGIQN                 | 580.5118 | 2318.224 | 0 |
| KNKKKSKKK                              | 558.8851 | 1115.75  | 2 |
| KNNRSSLIFI                             | 639.9438 | 1277.709 | 2 |
| KNNSIALVRCASML                         | 507.3302 | 1518.801 | 3 |
| KNNSS                                  | 549.375  | 548.2554 | 0 |
| KNPEITVH                               | 469.3595 | 936.5029 | 2 |
| KNPEITVH                               | 469.3597 | 936.5029 | 2 |
| KNQGHAN                                | 428.3026 | 854.3995 | 2 |
| KNRRSCGF                               | 484.2982 | 966.4818 | 2 |
| KNVLSLHV                               | 455.3105 | 908.5444 | 0 |
| KNYEFKKI                               | 535.3994 | 1068.597 | 2 |
| KNYEFKKI                               | 535.3578 | 1068.597 | 0 |
| KNYEFKKI                               | 535.3997 | 1068.597 | 2 |
| KNYEFKKI                               | 535.3997 | 1068.597 | 2 |
| KPIDRLDIVSRIF                          | 786.5068 | 1570.92  | 2 |
| KPIDRLDIVSRIF                          | 786.5068 | 1570.92  | 2 |
| KPIDRLDIVSRIF                          | 786.5068 | 1570.92  | 2 |

|                                           |          |          |   |
|-------------------------------------------|----------|----------|---|
| KPIVITPNKTY                               | 637.4669 | 1272.744 | 2 |
| KPLRIRLGGSL                               | 605.4205 | 1208.772 | 0 |
| KPPAH                                     | 549.3764 | 548.3071 | 0 |
| KPPAH                                     | 549.3754 | 548.3071 | 0 |
| KPPAH                                     | 549.3756 | 548.3071 | 0 |
| KPPAH                                     | 549.3752 | 548.3071 | 0 |
| KPPDH                                     | 593.4014 | 592.2969 | 0 |
| KPRQHIKI                                  | 510.3441 | 1018.64  | 2 |
| KPSWRILN                                  | 507.3506 | 1012.582 | 2 |
| KQIFRQVD                                  | 517.3694 | 1032.572 | 0 |
| KQINIEVEGLSVVKYYLSDYGYIESSGPFNNI          | 910.6649 | 3638.803 | 0 |
| KQKKRKKSKLTT                              | 737.5017 | 1472.952 | 0 |
| KQVEIKRTIPRGAAGSNSKDFRTKKIFV              | 794.5652 | 3173.815 | 0 |
| KQVNASRIVLQ                               | 628.3962 | 1254.741 | 2 |
| KRLVKVSKVMGKSGSRFGSGNNGSGMKSGKGSVPKSM     | 939.5971 | 3753.992 | 0 |
| KRNLPGN                                   | 399.7809 | 797.4508 | 2 |
| KRPPLR                                    | 766.5302 | 765.4973 | 0 |
| KRQRRSKPCTDV                              | 737.5011 | 1472.799 | 0 |
| KRRLQKK                                   | 535.3997 | 1068.724 | 2 |
| KRRLVH                                    | 808.5794 | 807.5192 | 0 |
| KRRRISIFSSSIG                             | 797.3939 | 1592.911 | 2 |
| KRRVRGVLN                                 | 549.4149 | 1096.694 | 2 |
| KRSVLANR                                  | 472.3303 | 942.5723 | 2 |
| KRTKSKPKAQKALS                            | 794.0364 | 1585.963 | 2 |
| KRVTESLLSVLLL                             | 735.9954 | 1469.918 | 2 |
| KSANKKIFRFA                               | 655.3788 | 1308.767 | 0 |
| KSASKISRTLSPKTEGKYKKRVTVETKVVMPKGKLNKSASA | 1141.828 | 4563.572 | 0 |
| KSATKN                                    | 648.4651 | 647.3602 | 0 |
| KSFIKLWASK                                | 604.4387 | 1206.713 | 0 |
| KSFIKLWASK                                | 604.4384 | 1206.713 | 0 |
| KSFIKLWASK                                | 604.4388 | 1206.713 | 0 |
| KSHRTSRNRK                                | 635.4152 | 1268.717 | 2 |
| KSCKGS                                    | 634.4512 | 633.381  | 0 |
| KSCKK                                     | 618.4543 | 617.4224 | 0 |
| KSCKK                                     | 618.4554 | 617.4224 | 0 |
| KSCKK                                     | 618.4552 | 617.4224 | 0 |
| KSKKSARVQALIDQ                            | 786.5385 | 1570.916 | 2 |
| KSRKKKPEKNGKKG                            | 871.1207 | 1740.085 | 2 |
| KSSHH                                     | 595.4042 | 594.2874 | 0 |
| KSSPTEAGT                                 | 439.2769 | 876.4189 | 2 |
| KSSSSFSH                                  | 477.3173 | 952.425  | 0 |
| KSVKNGRP                                  | 443.3322 | 884.5192 | 0 |
| KSVVFIAQKQ                                | 574.4295 | 1146.676 | 0 |
| KSWNIGPVSA                                | 529.8798 | 1057.556 | 2 |
| KTAQGLLE                                  | 430.2892 | 858.4811 | 2 |

|                                         |          |          |   |
|-----------------------------------------|----------|----------|---|
| KTASKK                                  | 662.4801 | 661.4123 | 0 |
| KTASKK                                  | 662.4808 | 661.4123 | 0 |
| KTCGTR                                  | 333.1669 | 664.3326 | 2 |
| KTGRLIISGLIYTE                          | 782.5003 | 1562.903 | 2 |
| KTGWPIVGVG                              | 507.3645 | 1012.571 | 2 |
| KTHKLHSH                                | 494.3195 | 986.541  | 2 |
| KTKKQLKP                                | 485.854  | 969.6335 | 2 |
| KTKNSSGRGKRV                            | 659.4801 | 1316.764 | 2 |
| KTLKHRRSK                               | 645.9706 | 1289.779 | 2 |
| KTSSKEKQQ                               | 532.3572 | 1062.567 | 2 |
| KTVELRKQGVRFV                           | 520.6935 | 1558.931 | 3 |
| KVARTSFT                                | 455.3105 | 908.508  | 0 |
| KVDAAGKLPRRK                            | 669.9557 | 1337.826 | 2 |
| KVDYVFKVVL                              | 605.4185 | 1208.717 | 0 |
| KVEKKKKKKKKV                            | 750.0113 | 1498.045 | 2 |
| KVGKLQGEK                               | 493.8508 | 985.592  | 2 |
| KVGRIIIQKTSMF                           | 507.6702 | 1519.891 | 3 |
| KVIDYIKRVY                              | 648.9572 | 1295.76  | 2 |
| KVLKVKHNSNLS                            | 683.9713 | 1365.809 | 2 |
| KVLVATKAKPN                             | 584.9265 | 1167.734 | 2 |
| KVPKPLKFLQQ                             | 663.449  | 1324.823 | 2 |
| KVPKPLKFLQQ                             | 663.449  | 1324.823 | 2 |
| KVRIPVLANGHRR                           | 506.0185 | 1514.927 | 3 |
| KVVGMSFG                                | 441.3091 | 880.4477 | 2 |
| KVVNELVPNQ                              | 570.3536 | 1138.635 | 2 |
| KWAAKKALSLGV                            | 636.4652 | 1270.776 | 2 |
| KWRGSTRLLL                              | 615.4544 | 1228.741 | 2 |
| KWRGSTRLLL                              | 615.4544 | 1228.741 | 2 |
| KWRKLF                                  | 439.2902 | 876.5334 | 2 |
| KWSFHV                                  | 402.2588 | 802.4126 | 2 |
| KWSHKIEALII                             | 669.4155 | 1336.787 | 2 |
| KWVRLLYN                                | 546.3968 | 1090.629 | 0 |
| KYEIGKKFG                               | 535.3994 | 1068.597 | 2 |
| KYEKPLQDLK                              | 421.3157 | 1260.708 | 0 |
| KYGRVKHIFV                              | 623.9572 | 1245.735 | 2 |
| KYIKVKVRGKRSEKLQETMP                    | 605.4387 | 2417.394 | 0 |
| LAATAVDFPKTG                            | 595.9193 | 1189.634 | 2 |
| LADRILKTWPGIHRALNSTRITLLSDEILVQKLFELFPF | 786.172  | 4710.642 | 6 |
| LAFLNLAQ                                | 445.3332 | 888.5069 | 0 |
| LAIDSGRHP                               | 483.3032 | 964.509  | 2 |
| LAKHLHFCEVCGKGFTRDANLRMH                | 700.5532 | 2798.368 | 0 |
| LAKKQGLK                                | 443.3014 | 884.5807 | 0 |
| LAKKYMKRVA                              | 604.4217 | 1206.727 | 2 |
| LALCFLLRHLNRR                           | 813.0806 | 1623.951 | 2 |
| LAPTSCSS                                | 383.1666 | 764.3375 | 0 |

|                                   |          |          |   |
|-----------------------------------|----------|----------|---|
| LAQQKEY                           | 440.2733 | 878.4498 | 2 |
| LARELTCDIEFGKSLLVTPNGSGKSSIF      | 760.5839 | 3038.575 | 0 |
| LARRFALVPLGPPL                    | 760.4823 | 1518.94  | 2 |
| LAVFIARIGK                        | 544.413  | 1086.691 | 2 |
| LAWLVIEAGVGAVF                    | 772.5224 | 1542.881 | 2 |
| LAWNFFYDVCPFEKIELNASKVYLSF        | 786.5985 | 3142.552 | 0 |
| LCNNFVKK                          | 965.5077 | 964.5164 | 0 |
| LCNNFVKK                          | 965.51   | 964.5164 | 0 |
| LCNNFVKK                          | 965.51   | 964.5164 | 0 |
| LCQINKLPGSMKNTC                   | 413.2621 | 1648.81  | 0 |
| LCVENSMRHHCPICYEYLF               | 786.3332 | 2356.026 | 3 |
| LCVENSMRHHCPICYEYLF               | 786.337  | 2356.026 | 3 |
| LDIVPFDSCSKEYQONLYEEWFNYADA       | 794.5605 | 3174.38  | 0 |
| LDLGRYNLGGTLAPELAH                | 637.4269 | 1909.006 | 0 |
| LDLNGNFS                          | 497.2347 | 992.4563 | 0 |
| LDNALKIFRR                        | 623.4519 | 1244.735 | 2 |
| LDPRVNRNPFTG                      | 693.3832 | 1384.721 | 2 |
| LDTGHCK                           | 387.1799 | 772.3538 | 2 |
| LDVVAYSS                          | 427.2791 | 852.4229 | 0 |
| LEAMKKARR                         | 551.893  | 1101.644 | 2 |
| LEAMKKARR                         | 551.893  | 1101.644 | 2 |
| LEASMLWRKR                        | 645.4635 | 1288.707 | 2 |
| LEAVRLAQMGNWSE                    | 535.3577 | 1602.783 | 0 |
| LEDVTSNRNNGNCS                    | 381.3332 | 1521.648 | 0 |
| LEFSFGVIPNVRAGK                   | 588.0316 | 1760.994 | 3 |
| LEIALPAFRPKSQISNSS                | 653.4001 | 1957.063 | 0 |
| LEKERAAAATAADETMMAMISRLQEEKASMELE | 881.6136 | 3522.7   | 0 |
| LEKKELSKPFA                       | 645.4649 | 1288.739 | 2 |
| LELHQB                            | 767.4534 | 766.4337 | 0 |
| LEMVKAKIKAA                       | 601.4376 | 1200.726 | 2 |
| LERRNSIKKLS                       | 672.4336 | 1342.804 | 2 |
| LETYVFAMFDENQKQPEFEKFWGLF         | 786.5984 | 3142.479 | 0 |
| LETYVFAMFDENQKQPEFEKFWGLF         | 786.5992 | 3142.479 | 0 |
| LETYVFAMFDENQKQPEFEKFWGLF         | 786.599  | 3142.479 | 0 |
| LEVLVISAQKGHGMQFPKGGWETDESMEQ     | 808.5814 | 3230.538 | 0 |
| LFALLDIEKVILG                     | 786.6035 | 1570.97  | 2 |
| LFALVAKQPT                        | 544.413  | 1086.644 | 2 |
| LFAPAYAGIVTS                      | 605.4204 | 1208.644 | 0 |
| FAWRLFQK                          | 661.4582 | 1320.771 | 2 |
| LFHNLFLEALDLV                     | 772.4872 | 1542.845 | 2 |
| LFHNLFLEALDLV                     | 772.5119 | 1542.845 | 2 |
| LFIPNCS                           | 397.1816 | 792.384  | 0 |
| LFIPNCS                           | 397.1814 | 792.384  | 0 |
| LFIPNCS                           | 397.1809 | 792.384  | 0 |
| LFIPNCS                           | 397.1801 | 792.384  | 0 |



|                             |          |          |   |
|-----------------------------|----------|----------|---|
| LFKERNYFMKIT                | 795.4202 | 1588.844 | 2 |
| LFKKWRR                     | 517.3695 | 1032.635 | 0 |
| LFKMLLEKAYN                 | 685.4283 | 1368.748 | 2 |
| LFLARDAVILA                 | 601.4387 | 1200.723 | 2 |
| LFLDEAPFNPNP                | 786.4104 | 1570.734 | 2 |
| LFLIIVAIVIVALF              | 772.5806 | 1543.015 | 0 |
| LFLGLQNVGKGNWRGISRN         | 561.3943 | 2241.25  | 0 |
| LFLPPLSF                    | 515.8631 | 1029.59  | 2 |
| LFLPQIKLPQTFV               | 772.486  | 1542.917 | 2 |
| LFPWIHAS                    | 485.8537 | 969.5073 | 2 |
| FRKGLGKSKKIHSVSA            | 619.4378 | 1855.116 | 0 |
| LFRVRLEV                    | 516.387  | 1030.629 | 0 |
| LFVLSRDGKINIVDGDGSGK        | 678.4709 | 2032.095 | 0 |
| LGGSGKTTLAKAVGK             | 694.4346 | 1386.82  | 2 |
| LGGSLYACAGGDC               | 425.1359 | 1272.512 | 0 |
| LGILIALILIVLSVCRGF          | 507.3267 | 2025.279 | 0 |
| LGKFLKSH                    | 465.3147 | 928.5494 | 2 |
| LGKLRGKIFMS                 | 625.4224 | 1248.738 | 2 |
| LGLGGLPALL                  | 518.8878 | 1035.669 | 2 |
| LGLKVS KPRNPVR              | 732.4769 | 1462.91  | 2 |
| LGLPRTRDF                   | 537.8771 | 1073.598 | 2 |
| LGQHAKHQ                    | 508.3344 | 1014.536 | 2 |
| LGRALALELAH                 | 582.3703 | 1162.682 | 2 |
| LGSVQLRRVLLWKN              | 590.4256 | 1768.047 | 0 |
| LGVLCACS                    | 383.1667 | 764.3561 | 0 |
| LGVPAH                      | 593.4013 | 592.3333 | 0 |
| LGVPAH                      | 593.4017 | 592.3333 | 0 |
| LGKTVLK                     | 461.3294 | 920.5695 | 2 |
| LGYNWK                      | 447.3156 | 892.4807 | 2 |
| LGYNWK                      | 447.3156 | 892.4807 | 2 |
| LHFQLKTFILKGV               | 772.5016 | 1542.929 | 2 |
| LHGQLQRIH                   | 551.391  | 1100.62  | 2 |
| LHKGQAV                     | 753.4732 | 752.4181 | 0 |
| LHLVLALLALTAGSAG            | 760.4844 | 1518.913 | 2 |
| LHNNLVLH                    | 480.3055 | 958.5349 | 2 |
| LHQKLGVLQKSLKGM             | 840.5411 | 1678.992 | 2 |
| LHRFSHVIV                   | 554.371  | 1106.635 | 2 |
| LHRLAIRS                    | 483.3757 | 964.593  | 2 |
| LHSLAILSR                   | 505.3889 | 1008.608 | 2 |
| LHTGSWYK                    | 496.3276 | 990.4923 | 2 |
| LIAGSLIKNPGGTIAPCG          | 421.3188 | 1680.923 | 0 |
| LIFFLFCMDYW                 | 749.3179 | 1496.687 | 2 |
| LIGHLKVF                    | 463.8407 | 925.575  | 2 |
| LIGKAPPRN                   | 483.3243 | 964.5818 | 2 |
| LIGVIVGVLAFLILLFILTFYCMRKRN | 810.5573 | 3237.927 | 0 |

|                                     |          |          |   |
|-------------------------------------|----------|----------|---|
| LIHGQKF                             | 421.7935 | 841.481  | 2 |
| LIIFSLLLLFVPI                       | 550.0435 | 1647.042 | 3 |
| LILRFFGLGFT                         | 642.4225 | 1282.744 | 2 |
| LILRIRLRDYGALSRQ                    | 648.4651 | 1942.159 | 0 |
| LILTLKWCL                           | 551.8805 | 1101.662 | 2 |
| LILVSH                              | 681.4529 | 680.4221 | 0 |
| LILVSH                              | 681.4543 | 680.4221 | 0 |
| LIQAEVSS                            | 423.7214 | 845.4495 | 2 |
| LIQAEVSS                            | 423.7214 | 845.4495 | 2 |
| LISAYVRNR                           | 546.3722 | 1090.625 | 2 |
| LISKALAKK                           | 486.3769 | 970.6539 | 0 |
| LISKALAKK                           | 486.3783 | 970.6539 | 0 |
| LISKFKF                             | 441.8273 | 881.5375 | 2 |
| LITKQGKQ                            | 458.3033 | 914.5549 | 2 |
| LITSRHSLVSLLI                       | 522.3449 | 1563.971 | 3 |
| LIYGTGNR                            | 447.3446 | 892.4767 | 0 |
| LKAGPVVGFV                          | 493.8508 | 985.5961 | 2 |
| LKAHRLAR                            | 964.7108 | 963.609  | 0 |
| LKAQTTGY                            | 441.2959 | 880.4655 | 0 |
| LKEIHDKFLALMIALVAAKN                | 560.4129 | 2237.297 | 0 |
| LKEIKKTKKRHQ                        | 513.0022 | 1535.962 | 3 |
| LKENLSAAGKGKPLTQTRR                 | 722.5035 | 2164.244 | 0 |
| LKFREEHKKPLF                        | 786.4774 | 1570.898 | 2 |
| LKGVSGNNNSST                        | 295.15   | 1176.574 | 0 |
| LKHGKKS                             | 910.6645 | 909.576  | 0 |
| LKIALAAPVTV                         | 633.4298 | 1264.812 | 2 |
| LKILNLSHSRN                         | 647.9415 | 1293.752 | 2 |
| LKKGNLVRF                           | 537.8772 | 1073.671 | 2 |
| LKKLKQIDEVRK                        | 499.9795 | 1496.94  | 3 |
| LKKVIAMRSRMEF                       | 537.0205 | 1607.9   | 3 |
| LKLKMIKCLVKKKPPK                    | 632.4701 | 1894.235 | 0 |
| LKMISSF                             | 413.3208 | 824.4466 | 0 |
| LKNLFRIRVINTG                       | 772.5016 | 1542.936 | 2 |
| LKQPQLFKR                           | 579.4249 | 1156.708 | 2 |
| LKSIKSSH                            | 450.2958 | 898.5236 | 2 |
| LKSPVWRG                            | 471.8381 | 941.5447 | 2 |
| LKSRPRPSSPSGALRRPNAAARNGDAVPGRVRVAV | 955.7527 | 3819.132 | 0 |
| LKVSPVI                             | 427.8124 | 853.5637 | 2 |
| LKVYTTYKKNAS                        | 708.4626 | 1414.782 | 2 |
| LKYIVEKNSKR                         | 689.4901 | 1376.814 | 2 |
| LLACKHMKN                           | 529.3767 | 1056.557 | 2 |
| LLAVGTTTSQVRGCGEASCDSIF             | 772.3142 | 2314.093 | 3 |
| LLDYKRRRWQK                         | 767.4558 | 1532.894 | 0 |
| LLEIILGKRSH                         | 639.943  | 1277.782 | 2 |
| LLESEAPK                            | 443.8075 | 885.4808 | 2 |

|                         |          |          |   |
|-------------------------|----------|----------|---|
| LLFLSSKASFKPPKSIRGG     | 678.4773 | 2032.183 | 0 |
| LLFRVIRVF               | 581.9031 | 1161.739 | 2 |
| LLFSVNASGQ              | 518.3412 | 1034.54  | 2 |
| LLHLKTSA                | 441.8127 | 881.5334 | 2 |
| LLHLNVAAC               | 477.3167 | 952.5164 | 0 |
| LLHRAAK                 | 808.5812 | 807.5079 | 0 |
| LLIAVPPK                | 441.3717 | 880.611  | 0 |
| LLIHCQRWLRIN            | 522.346  | 1563.882 | 3 |
| LLIRVF                  | 760.5828 | 759.5007 | 0 |
| LLIRVF                  | 760.5815 | 759.5007 | 0 |
| LLKLRRH                 | 468.3877 | 934.6188 | 0 |
| LLKNSPTLLPLP            | 653.4484 | 1304.807 | 2 |
| LLFFCSH                 | 490.3563 | 978.4997 | 2 |
| LLLFRKCLKIAKLVNLV       | 997.6941 | 1993.354 | 0 |
| LLNLKK                  | 421.3162 | 840.5797 | 0 |
| LLVGVF                  | 760.5829 | 759.4894 | 0 |
| LLWILLMALI              | 656.4254 | 1310.84  | 2 |
| LLNKFLSC                | 469.3263 | 936.5103 | 0 |
| LLPILFKFF               | 617.9318 | 1233.753 | 2 |
| LLPPQHHQ                | 549.3747 | 1096.578 | 0 |
| LLPPQHHQ                | 549.3761 | 1096.578 | 0 |
| LLSFRKFS                | 499.3707 | 996.5756 | 2 |
| LLSLRKCGR               | 523.3817 | 1044.623 | 0 |
| LLSLSLYKRLIIAIEVK       | 986.7143 | 1971.25  | 2 |
| LLSLSLYKRLIIAIEVK       | 986.7143 | 1971.25  | 2 |
| LLSLVGNLGGIGG           | 585.3512 | 1168.682 | 2 |
| LLTGQVVAVKRLN           | 705.9837 | 1409.872 | 2 |
| LLTIATTISAVRLIVN        | 425.3231 | 1697.045 | 0 |
| LLTSLLIIRFYR            | 503.3056 | 1506.929 | 0 |
| LLVDGFPELSMT            | 441.279  | 1320.664 | 3 |
| LLVFLKSYRN              | 626.8999 | 1251.734 | 2 |
| LLVGTPGRILDIAKK         | 797.468  | 1592.998 | 0 |
| LLVLVDSIRPNK            | 456.288  | 1365.834 | 3 |
| LLVLVMDL                | 458.3033 | 914.5511 | 2 |
| LLVTRNPCLKMI            | 713.4772 | 1424.89  | 2 |
| LLYFPFKF                | 537.8771 | 1073.595 | 2 |
| LLYKVVDMA               | 526.3282 | 1050.578 | 2 |
| LMKLLTYESVEEMVVKRVKKKAM | 689.1537 | 2752.542 | 0 |
| LMKMEENGCLPNEFTYNVF     | 760.3191 | 2278.011 | 3 |
| LMLSLKFGIPIVV           | 772.0238 | 1541.962 | 2 |
| LMSGGNSVRGSALVGS        | 746.4576 | 1490.751 | 2 |
| LNEPKPYPEPKLF           | 786.4819 | 1570.84  | 2 |
| LNHKKKLCCK              | 620.4098 | 1238.765 | 2 |
| LNKVREICKCVLIG          | 794.5641 | 1586.9   | 0 |
| LNKVREICKCVLIG          | 794.564  | 1586.9   | 0 |

|                                 |          |          |   |
|---------------------------------|----------|----------|---|
| LNLFSVQLRLGLF                   | 760.4857 | 1518.892 | 2 |
| LNLGDLVGKP                      | 513.3769 | 1024.592 | 0 |
| LPAFFKHNNFS                     | 441.2966 | 1320.662 | 0 |
| LPEPGKR                         | 796.5392 | 795.4603 | 0 |
| LPFPRRVFA                       | 551.893  | 1101.645 | 2 |
| LPGGPIDGKILG                    | 568.8917 | 1135.66  | 2 |
| LPGIPKQ                         | 752.5135 | 751.4592 | 0 |
| LPGRKKWVK                       | 371.3259 | 1110.703 | 0 |
| LPHVNAVGS                       | 447.3156 | 892.4767 | 2 |
| LPIEQQLFVDGLIR                  | 590.4251 | 1768.025 | 0 |
| LPKDLFF                         | 440.2733 | 878.4902 | 2 |
| LPKYPPSKEM                      | 397.1802 | 1188.621 | 0 |
| LPLGLIF                         | 772.5824 | 771.4894 | 0 |
| LPLPISDPPKN                     | 595.9193 | 1189.671 | 2 |
| LPLPISDPPKN                     | 595.9194 | 1189.671 | 2 |
| LPLPISDPPKN                     | 595.9194 | 1189.671 | 2 |
| LPLVIKVIGRSLSNRP                | 441.3502 | 1761.099 | 0 |
| LPLVPPTT                        | 419.3159 | 836.5007 | 2 |
| LPMLEHGL                        | 455.311  | 908.479  | 0 |
| LPNELNKLFYL                     | 455.311  | 1362.755 | 0 |
| LPNGVSHPSLNC                    | 413.2631 | 1236.592 | 0 |
| LPNGVSHPSLNC                    | 413.264  | 1236.592 | 0 |
| LPNIILLPVEK                     | 681.4929 | 1360.869 | 2 |
| LPNNAPAW                        | 441.7656 | 881.4396 | 2 |
| LPNNFGSK                        | 438.7872 | 875.4501 | 2 |
| LPNNGFTF                        | 455.2231 | 908.4392 | 0 |
| LPNNGFTF                        | 455.3093 | 908.4392 | 0 |
| LPNNGFTF                        | 455.3129 | 908.4392 | 0 |
| LPNNGFTF                        | 455.3108 | 908.4392 | 0 |
| LPNNGFTF                        | 455.3105 | 908.4392 | 0 |
| LPNNGFTF                        | 455.312  | 908.4392 | 0 |
| LPNNGFTF                        | 455.3106 | 908.4392 | 0 |
| LPPELGKLDKLVSLD                 | 546.3976 | 1635.945 | 0 |
| LPPSREEQWKMAVAELSHKLLHATRKRDEAL | 910.6646 | 3638.947 | 0 |
| LPRRAKSKKR                      | 620.434  | 1238.805 | 0 |
| LPRSSSS                         | 367.1724 | 732.3766 | 0 |
| LPRSSSS                         | 367.171  | 732.3766 | 0 |
| LPRSSSS                         | 367.1708 | 732.3766 | 0 |
| LPRSSSS                         | 367.1715 | 732.3766 | 0 |
| LPRSSSS                         | 367.171  | 732.3766 | 0 |
| LPSILVNLKR                      | 625.4258 | 1248.792 | 2 |
| LPSMVTPL                        | 429.3164 | 856.4728 | 0 |
| LPTEKLLVLGG                     | 570.3664 | 1138.696 | 2 |
| LPVILTSLIHS                     | 604.8872 | 1207.718 | 2 |
| LPVVMVASYT                      | 540.355  | 1078.573 | 2 |

|                               |          |          |   |
|-------------------------------|----------|----------|---|
| LQAGVGLSALDFSVF               | 762.3227 | 1522.803 | 2 |
| LQARHNKA                      | 469.3269 | 936.5253 | 0 |
| LQGDSAGNHLKVAACCKHYTAYDLNWN   | 777.5677 | 3106.403 | 0 |
| LQHQGERLEEM                   | 693.3832 | 1384.641 | 2 |
| LQIYKTRN                      | 518.3415 | 1034.587 | 2 |
| LQLNNGKKKKI                   | 642.4225 | 1282.809 | 2 |
| LQPLPLARQAS                   | 645.9706 | 1289.746 | 2 |
| LQVLPTAIGVF                   | 579.4249 | 1156.686 | 2 |
| LRDKVKSSLR                    | 601.4387 | 1200.73  | 2 |
| LREKRRNN                      | 529.3716 | 1056.615 | 0 |
| LRIGMGC                       | 383.1667 | 764.3673 | 2 |
| LRIGMGC                       | 383.1651 | 764.3673 | 0 |
| LRIMGGC                       | 383.1667 | 764.3673 | 2 |
| LRIMGGC                       | 383.1657 | 764.3673 | 0 |
| LRIQRAQRRR                    | 676.9483 | 1351.839 | 2 |
| LRIVVLLPSLLHLR                | 871.1207 | 1740.15  | 2 |
| LRIYKERN                      | 546.3992 | 1090.625 | 0 |
| LRMRRIVIQEL                   | 713.9824 | 1425.86  | 2 |
| LRNPLISN                      | 463.8407 | 925.5345 | 2 |
| LRPNFS                        | 367.1708 | 732.3918 | 0 |
| LRPNFS                        | 367.1709 | 732.3918 | 0 |
| LRPNFS                        | 367.1712 | 732.3918 | 0 |
| LRPNFS                        | 367.1711 | 732.3918 | 0 |
| LRPNFS                        | 367.1702 | 732.3918 | 0 |
| LRPNFS                        | 367.1706 | 732.3918 | 0 |
| LRSSAAPKRR                    | 571.4282 | 1140.684 | 2 |
| LRTGLDRRLTAWK                 | 529.3276 | 1584.921 | 3 |
| LRTLPIYIFH                    | 580.3847 | 1158.655 | 2 |
| LRTLYKHH                      | 534.3657 | 1066.604 | 2 |
| LSDGLMGFYERMGDTLAQ            | 535.9075 | 2139.972 | 4 |
| LSDLAPNK                      | 429.3167 | 856.4655 | 0 |
| LSDLAPNK                      | 429.3162 | 856.4655 | 0 |
| LSDLRAQVAANQ                  | 429.3166 | 1284.679 | 0 |
| LSEEVRAAHKREF                 | 786.4257 | 1570.822 | 2 |
| LSEHPAGVYFDWAGLSARGVF         | 760.319  | 2278.117 | 3 |
| LSGYLKKFN                     | 535.3994 | 1068.597 | 2 |
| LSGYLKKFN                     | 535.3994 | 1068.597 | 2 |
| LSIPLAKEGAV                   | 549.415  | 1096.649 | 2 |
| LSIQQPLK                      | 463.8407 | 925.5597 | 2 |
| LSISLLIKLH                    | 625.4258 | 1248.817 | 2 |
| LSKLVLRKDIKN                  | 713.9822 | 1425.903 | 2 |
| LSKPIPDGSSPDYERSTVEEALKVKSQRQ | 808.5803 | 3230.642 | 0 |
| LSKRKNAF                      | 482.3006 | 962.5662 | 2 |
| LSKVAVHK                      | 441.3725 | 880.5494 | 0 |
| LSLAIIVVAAVGG                 | 683.9713 | 1365.86  | 2 |

|                                 |          |          |   |
|---------------------------------|----------|----------|---|
| LSELLIKKHQ                      | 540.354  | 1078.686 | 2 |
| LSELLIKKHQ                      | 540.354  | 1078.686 | 2 |
| LSELLIKKHQ                      | 540.354  | 1078.686 | 2 |
| LSELLIKKHQ                      | 540.354  | 1078.686 | 2 |
| LSELLIKKHQ                      | 540.355  | 1078.686 | 2 |
| LSLSNNSF                        | 441.2074 | 880.4291 | 0 |
| LSPSLSHFHQHS                    | 505.3489 | 1512.722 | 0 |
| LSQLPLNPAPKELQ                  | 782.5003 | 1562.867 | 2 |
| LSRKISTRVF                      | 603.9157 | 1205.725 | 2 |
| LSRSTMPVLELQILTI                | 605.4382 | 1813.038 | 0 |
| LSSHKQSLTT                      | 551.3778 | 1100.583 | 0 |
| LSSSNKSLAASAIEYTNPA             | 962.4972 | 1922.959 | 2 |
| LSTAAAKAVKLLPKS                 | 813.5301 | 1625.024 | 0 |
| LSTEAPNPGHGQGSNK                | 797.3939 | 1592.754 | 2 |
| LSTIVIGFAYN                     | 599.3674 | 1196.644 | 2 |
| LSYLGMRN                        | 477.3172 | 952.48   | 0 |
| LTFPAHLTH                       | 518.844  | 1035.55  | 2 |
| LTGSSPFAGIAIGSETSGGVENVLAEHINLF | 772.585  | 3086.556 | 0 |
| LTKKGLIPNAF                     | 601.4624 | 1200.723 | 0 |
| LTKVFTSKTKKKKTK                 | 442.3512 | 1765.119 | 0 |
| LTLEKDENNELMEIDH                | 681.3101 | 2040.967 | 3 |
| LTREVFHGRLRN                    | 499.9799 | 1496.832 | 3 |
| LTRKRRQFSM                      | 661.9582 | 1321.74  | 2 |
| LTSKAVSLLDH                     | 592.4264 | 1182.661 | 2 |
| LTSQVIARSA                      | 516.8352 | 1031.561 | 2 |
| LTSGLI                          | 302.1955 | 602.364  | 2 |
| LTVVIHGS                        | 413.2659 | 824.4756 | 0 |
| LYYFIV                          | 378.2116 | 754.4265 | 2 |
| LYYFVII                         | 491.3318 | 980.5947 | 0 |
| LVDSEGHVTTQVKGTMGYLDP           | 601.463  | 2402.19  | 0 |
| LVGCLALIRR                      | 557.4376 | 1112.685 | 0 |
| LVIAGVISIFKIII                  | 750.0113 | 1497.99  | 2 |
| LVIAGVISIFKIII                  | 750.0111 | 1497.99  | 2 |
| LVITIALILVLF                    | 794.5629 | 1587.042 | 0 |
| LVKILTIFCIDF                    | 763.5146 | 1524.863 | 2 |
| LVKILTIFTSIDL                   | 738.4732 | 1474.901 | 2 |
| LVKKKPPK                        | 469.3493 | 936.6484 | 0 |
| LVLVVVVVAHQ                     | 612.4204 | 1222.744 | 2 |
| LVLVVVF                         | 786.597  | 785.5051 | 0 |
| LVNGKNTIY                       | 511.3148 | 1020.56  | 2 |
| LVNNTASY                        | 441.2663 | 880.4291 | 2 |
| LVPKGMNIQIPVPLL                 | 873.5996 | 1745.027 | 2 |
| LVPLGYRSA                       | 496.3288 | 990.5498 | 2 |
| LVPLGYRSA                       | 496.3288 | 990.5498 | 2 |
| LVPNIKILKQCG                    | 663.4349 | 1324.79  | 2 |

|                                  |          |          |   |
|----------------------------------|----------|----------|---|
| LVPPQESQRR                       | 403.8945 | 1208.663 | 3 |
| LVRVEVKGCGKFG                    | 696.4341 | 1390.776 | 2 |
| LVTSTMKKRRNN                     | 724.4485 | 1446.809 | 2 |
| LVVANNSALLITVIGA                 | 590.0622 | 1767.051 | 3 |
| LVVHFDKPQL                       | 598.3967 | 1194.676 | 2 |
| LWRILGVN                         | 485.8537 | 969.576  | 2 |
| LYHPLFKRLLDK                     | 772.024  | 1541.908 | 2 |
| LYHVLLSLGS                       | 551.3763 | 1100.623 | 2 |
| LYIVKNLL                         | 488.3311 | 974.6165 | 2 |
| LYRIQKILM                        | 393.2955 | 1176.705 | 0 |
| LYRPVHSRSMGNMS                   | 409.362  | 1633.782 | 0 |
| LYYAVWFNSQSSQ                    | 797.3401 | 1592.715 | 2 |
| MARYVYGLIFLVAN                   | 544.0082 | 1628.875 | 3 |
| MEDTHIDELQSSFRNTCN               | 557.4378 | 2225.932 | 0 |
| MENSSEKCNFEGNKELNAS              | 533.4527 | 2129.899 | 0 |
| MERREKGEK                        | 581.9034 | 1161.592 | 2 |
| MESRDLPSSSPSSTANRDASSATDAEDGVF   | 772.5813 | 3086.337 | 0 |
| MFEM                             | 279.1586 | 556.2025 | 2 |
| MGIQKYVFYSIHNC                   | 455.221  | 1816.828 | 0 |
| MGITHLQRIGTGLF                   | 772.5015 | 1542.834 | 2 |
| MGPMGQMGPMVQRGPMNQMGPMDHMRNMNINM | 909.6477 | 3634.517 | 0 |
| MGSKILLTRN                       | 617.4287 | 1232.691 | 2 |
| MGTTTTPLSH                       | 523.3564 | 1044.491 | 2 |
| MHNVHQ                           | 383.166  | 764.3388 | 0 |
| MISFINSTNNCLMMFDEAQETTTQLF       | 786.5969 | 3142.376 | 0 |
| MITGRRIDQSRPSEEQNLVTWAQPLF       | 786.5992 | 3142.598 | 0 |
| MITGRRIDQSRPSEEQNLVTWAQPLF       | 786.5974 | 3142.598 | 0 |
| MKLHSATELPAKADQNCKNVESSIEHP      | 727.4502 | 2905.406 | 0 |
| MPLCLLDLQTESWMCTMGLNGFCRSLF      | 786.0979 | 3140.397 | 4 |
| MPVPVCTC                         | 425.2126 | 848.3594 | 0 |
| MQLKQMC                          | 441.2066 | 880.3969 | 0 |
| MREIQAIMRQIASSITYLPCLDEPCVF      | 786.5979 | 3142.533 | 0 |
| MRLPVRSVLGFKC                    | 753.4737 | 1504.837 | 0 |
| MSSSNFE                          | 409.1614 | 816.296  | 0 |
| MSSSNFE                          | 409.1615 | 816.296  | 0 |
| MTEPRAVRK                        | 363.2135 | 1086.597 | 0 |
| MVKEELVK                         | 488.3573 | 974.5471 | 0 |
| MVKEELVK                         | 488.3574 | 974.5471 | 0 |
| MVLLGLLLVGFLSQLGSSV              | 649.4465 | 1945.132 | 0 |
| MYEF                             | 295.128  | 588.2254 | 2 |
| MYGNCKSM                         | 467.1009 | 932.3554 | 2 |
| MYKKRRAIK                        | 597.3957 | 1192.723 | 2 |
| MYMEEM                           | 425.1341 | 848.2755 | 0 |
| NAGVF                            | 507.3288 | 506.2489 | 0 |
| NAGYAIFVV                        | 477.3163 | 952.5018 | 0 |

|                                     |          |          |   |
|-------------------------------------|----------|----------|---|
| NALRSMFA                            | 455.3089 | 908.4538 | 0 |
| NASVNFLDEEKPLYPPTIKNDDLHKVF         | 786.5956 | 3142.597 | 0 |
| NATVF                               | 551.3575 | 550.2751 | 0 |
| NCELLTNNQP                          | 573.2201 | 1144.518 | 2 |
| NCESDHICYDEHGDAC                    | 453.3902 | 1809.603 | 0 |
| NCSNLGGAGLPPDADSLSDKQHAGGTTASIPSS   | 782.1004 | 3124.437 | 4 |
| NDFRNNSMQSEPTYNGTS                  | 541.4411 | 2161.897 | 0 |
| NDFYSQGVQLAPRSFLFPCCK               | 773.0081 | 2316.136 | 3 |
| NDPNHWV                             | 441.207  | 880.3828 | 0 |
| NEAGTGTYKGPNNLPASFMTATESGDRYEP      | 794.5621 | 3174.42  | 0 |
| NEFPSEGVDPRSSSRWTEMEISNLMLQR        | 860.6646 | 3438.593 | 0 |
| NEGSKRVKN                           | 516.3866 | 1030.552 | 0 |
| NEGSKRVKN                           | 516.3874 | 1030.552 | 0 |
| NEGSKRVKN                           | 516.3872 | 1030.552 | 0 |
| NEVVLPMYFSSNPSSKSK                  | 536.4853 | 2142.03  | 0 |
| NFGRYKQTYTRKRQK                     | 494.3168 | 1973.071 | 4 |
| NFIVLNDL                            | 474.3152 | 946.5124 | 2 |
| NFLKFWRNAT                          | 648.9142 | 1295.678 | 2 |
| NGDTLVVKVTN                         | 580.4022 | 1158.625 | 2 |
| NGFLKK                              | 706.506  | 705.4174 | 0 |
| NGFLKK                              | 706.5064 | 705.4174 | 0 |
| NGPKPVVAFVTG                        | 593.4408 | 1184.655 | 2 |
| NGPKPVVAFVTG                        | 593.441  | 1184.655 | 2 |
| NGRPDSGF                            | 425.2117 | 848.3777 | 0 |
| NHKKIFAAS                           | 508.3682 | 1014.561 | 2 |
| NHTGGGY                             | 353.1551 | 704.2878 | 0 |
| NIACHVAVFFLHFFLKGGCNGIGAWLFNSILNLAL | 955.7521 | 3818.995 | 0 |
| NIACHVAVFFLHFFLKGGCNGIGAWLFNSILNLAL | 955.7546 | 3818.995 | 0 |
| NIFLNKLKKS                          | 602.9101 | 1203.734 | 2 |
| NILKPGPQA                           | 469.3508 | 936.5392 | 0 |
| NIPVGGGRKNKRSSASC                   | 455.3111 | 1816.933 | 0 |
| NIRSQRHLTIF                         | 786.4221 | 1570.837 | 2 |
| NIVINNNDPSSSSVSYNPSPRLA             | 640.5334 | 2558.236 | 0 |
| NKGPPAK                             | 711.4627 | 710.4075 | 0 |
| NKGYGRGPIQL                         | 683.427  | 1364.72  | 0 |
| NKHH                                | 535.3589 | 534.2663 | 0 |
| NKHH                                | 535.3595 | 534.2663 | 0 |
| NKHH                                | 535.3595 | 534.2663 | 0 |
| NKHH                                | 535.3589 | 534.2663 | 0 |
| NKKKVNF                             | 439.2902 | 876.5181 | 2 |
| NKKRKKGRRE                          | 650.4207 | 1298.801 | 2 |
| NKKRKLDPDGISRGVELLKN                | 722.5025 | 2164.281 | 0 |
| NKKRPRGLKA                          | 584.3801 | 1166.736 | 2 |
| NKKSLEVNLP                          | 571.4282 | 1140.65  | 2 |
| NKPRKSSNKPK                         | 642.4225 | 1282.747 | 2 |



|                                   |          |          |   |
|-----------------------------------|----------|----------|---|
| NKVLSVVG                          | 815.5104 | 814.4913 | 0 |
| NKYTGVLGVF                        | 549.4149 | 1096.592 | 2 |
| NLCELQRQCPSSDSICPYEVNYLSNGTSTTGFL | 910.665  | 3638.633 | 0 |
| NLCSKCYKDYLKVTKSNECETKNLNDQVFL    | 910.6652 | 3638.778 | 0 |
| NLEGLKFPKSL                       | 623.4519 | 1244.713 | 2 |
| NLESSSHN                          | 444.3052 | 886.3781 | 2 |
| NLIKAQEQLKCLKTE                   | 595.3887 | 1783.057 | 3 |
| NLKDSCRDTAQASEESGACDFTMAINDF      | 760.5803 | 3038.269 | 0 |
| NLKYLILRN                         | 573.9063 | 1145.692 | 2 |
| NLKYLILRN                         | 573.9063 | 1145.692 | 2 |
| NLLRLALSNGYQ                      | 341.2654 | 1360.746 | 0 |
| NLNIAVKMSVREYQNLTPYATALEENW       | 808.58   | 3230.571 | 0 |
| NLQKKVLSFVK                       | 652.4234 | 1302.802 | 2 |
| NRLLDLH                           | 497.3201 | 992.5767 | 2 |
| NLTGEIPATLNAVPAL                  | 399.3069 | 1592.877 | 0 |
| NLTKLKVKS                         | 515.8644 | 1029.655 | 2 |
| NLVNRYKGKET                       | 441.2967 | 1320.715 | 0 |
| NMIVGGLKLHVN                      | 647.9425 | 1293.723 | 2 |
| NMKAKTRSEACQRKRSQAFDSNKVTSME      | 808.5816 | 3230.571 | 0 |
| NMMFDVSNNGDDYLIHQYVGP             | 772.3241 | 2314.003 | 3 |
| NNGGNAIYMS                        | 529.197  | 1056.418 | 2 |
| NNGVLPLKPPPGRPDLLPHE              | 540.8618 | 2159.185 | 4 |
| NNHNYA                            | 367.1703 | 732.2827 | 0 |
| NNHNYA                            | 367.1682 | 732.2827 | 0 |
| NNHNYA                            | 367.1707 | 732.2827 | 0 |
| NNKKNTM                           | 425.2119 | 848.4174 | 0 |
| NNKKNTM                           | 425.2136 | 848.4174 | 0 |
| NNKSKLSG                          | 424.2731 | 846.4559 | 2 |
| NNNDDNDNNNDPNNN                   | 458.3471 | 1829.643 | 0 |
| NNNDDNDNNNDPNNN                   | 458.3469 | 1829.643 | 0 |
| NNRRRHNPNVLTFRDFVNHVHNTRRGGDC     | 865.6208 | 3458.674 | 0 |
| NNPAGSPH                          | 397.1816 | 792.3514 | 0 |
| NNPFSFLVPPQESQRR                  | 639.331  | 1914.97  | 3 |
| NNPFSFLVPPQESQRR                  | 639.331  | 1914.97  | 3 |
| NNVLYILKVM                        | 603.9157 | 1205.684 | 2 |
| NNVRVKDTFSCRAWGYVSNDYRPREFFLSL    | 910.6629 | 3638.784 | 0 |
| NPANIHQ                           | 397.1809 | 792.3879 | 0 |
| NPANIHQ                           | 397.1804 | 792.3879 | 0 |
| NPFSFLVPPKESQRR                   | 601.3165 | 1800.964 | 3 |
| NPFSFLVPPQESQRR                   | 601.3165 | 1800.927 | 3 |
| NPIKRK                            | 755.4882 | 754.4814 | 0 |
| NPSSC                             | 254.1608 | 506.1795 | 2 |
| NPVCHFLGSK                        | 551.3547 | 1100.544 | 0 |
| NQENGAISFFWSWSYWSTF               | 786.337  | 2356.023 | 3 |
| NQFKTKGGLKVGT                     | 689.4928 | 1376.778 | 2 |

|                                           |          |          |   |
|-------------------------------------------|----------|----------|---|
| NRIPV                                     | 711.4609 | 710.4439 | 0 |
| NRKKNKHNNLS                               | 676.9483 | 1351.743 | 2 |
| NRKN                                      | 531.3848 | 530.2925 | 0 |
| NRKSLPV                                   | 813.5289 | 812.4868 | 0 |
| NRLVKKSEK                                 | 551.3509 | 1100.667 | 0 |
| NRNKTH                                    | 385.1797 | 768.3991 | 0 |
| NRNNKKGNHKVLK                             | 517.3678 | 1548.896 | 0 |
| NRRVHVILN                                 | 560.8615 | 1119.663 | 2 |
| NRSWQLRK                                  | 544.413  | 1086.605 | 2 |
| NRWRKR                                    | 458.3033 | 914.5311 | 2 |
| NRYLTAWK                                  | 526.3363 | 1050.561 | 2 |
| NRYLTAWK                                  | 526.3363 | 1050.561 | 2 |
| NSMVWMLAMIF                               | 481.2378 | 1440.697 | 0 |
| NSNNNDNLNNPQRPTSSGMS                      | 569.4718 | 2273.968 | 0 |
| NSSEVLWN                                  | 531.2719 | 1060.519 | 0 |
| NSSTGLVVPPTIDL                            | 658.408  | 1314.703 | 2 |
| NSVTVKR                                   | 402.2588 | 802.4661 | 2 |
| NTLNQGF                                   | 397.1802 | 792.3766 | 0 |
| NVDDINNYADLGFYSQIS                        | 683.3071 | 2046.917 | 3 |
| NVHDVPSQGAKRYSYSGNLT                      | 533.4504 | 2130.045 | 0 |
| NVIEETASM                                 | 497.2327 | 992.4485 | 0 |
| NVINHER                                   | 441.2663 | 880.4515 | 2 |
| NVIPVLA                                   | 725.4797 | 724.4483 | 0 |
| NVLNKISSGKEVSF                            | 761.483  | 1520.82  | 2 |
| NVNQPRHFCKNCQRYWTAGGVMRN                  | 720.525  | 2878.344 | 0 |
| NVSGLNALKPLLRWAKK                         | 1011.67  | 2021.19  | 0 |
| NVTNNGF                                   | 383.1674 | 764.3453 | 2 |
| NVTVLEKPVPLL                              | 441.2802 | 1320.802 | 3 |
| NVVVRCSVSSS                               | 568.878  | 1135.566 | 2 |
| NVYVNSTFDGPTFSYSGNQNLTLFYECEASSRITETPENLF | 786.172  | 4711.134 | 6 |
| NWDTGHVISEAGIF                            | 773.3507 | 1544.726 | 2 |
| NWVSRNVV                                  | 487.3246 | 972.5141 | 2 |
| NYCPGDKSCPHQSS                            | 381.3314 | 1521.598 | 0 |
| NYLRKRYREDLFKD                            | 639.4132 | 1915.007 | 3 |
| NYSSS                                     | 279.093  | 556.2129 | 2 |
| PAAPPPQKKK                                | 531.3836 | 1060.639 | 0 |
| PAIAVALGV                                 | 810.5554 | 809.5011 | 0 |
| PALASRIIQGNK                              | 423.3618 | 1266.741 | 0 |
| PAPGPGGPKHHFNGERQVKDFIHTLLHYGG            | 816.6364 | 3262.654 | 0 |
| PARSDST                                   | 367.1707 | 732.3402 | 0 |
| PASHVTRKKK                                | 576.4109 | 1150.694 | 2 |
| PASKAQVVGWPPIRSFRKNSMATT                  | 683.4297 | 2729.444 | 0 |
| PAVLAYLY                                  | 455.3104 | 908.5007 | 0 |
| PAVPDPKTALMFYALLLKFGADYANDVF              | 772.5826 | 3086.583 | 0 |
| PCAHN                                     | 271.0604 | 540.2115 | 2 |

|                                |          |          |   |
|--------------------------------|----------|----------|---|
| PCAHN                          | 271.0602 | 540.2115 | 2 |
| PCAHN                          | 271.0602 | 540.2115 | 2 |
| PDDSPALD                       | 415.2109 | 828.3501 | 2 |
| PDIGGFGC <sup>d</sup>          | 383.1668 | 764.3163 | 0 |
| PDIGGFGC <sup>d</sup>          | 383.1661 | 764.3163 | 0 |
| PDIGGFGC <sup>d</sup>          | 383.165  | 764.3163 | 0 |
| PDIGGFGC <sup>d</sup>          | 383.1653 | 764.3163 | 0 |
| PDIGGFGC <sup>d</sup>          | 383.1654 | 764.3163 | 0 |
| PDIGGFGC <sup>d</sup>          | 383.1656 | 764.3163 | 0 |
| PDIGGFGC <sup>d</sup>          | 383.1672 | 764.3163 | 0 |
| PDIGGFGC <sup>d</sup>          | 383.1672 | 764.3163 | 0 |
| PDIGGFGC <sup>d</sup>          | 383.1658 | 764.3163 | 0 |
| PDIGGFGC <sup>d</sup>          | 383.1653 | 764.3163 | 0 |
| PDIGGFGC <sup>d</sup>          | 383.1666 | 764.3163 | 0 |
| PDIGGFGC <sup>d</sup>          | 383.1659 | 764.3163 | 0 |
| PDIGGFGC <sup>d</sup>          | 383.1651 | 764.3163 | 0 |
| PDIGGFGC <sup>d</sup>          | 383.1658 | 764.3163 | 0 |
| PDIGGFGC <sup>d</sup>          | 383.1657 | 764.3163 | 0 |
| PDIGGFGC <sup>d</sup>          | 383.1657 | 764.3163 | 0 |
| PEEVQQGF                       | 467.2041 | 932.424  | 0 |
| PEFDVRN                        | 438.787  | 875.4138 | 2 |
| PEGVNNIHL                      | 497.2312 | 992.4927 | 0 |
| PEHFCECYSD                     | 615.1371 | 1228.417 | 0 |
| PEIQGRFIGTKLHTLKADFYEVAKMF     | 760.5829 | 3038.605 | 0 |
| PEPFIDERVERYGSIFTTHVFGEATVF    | 786.5981 | 3142.54  | 0 |
| PEQRIIAVKHLGI                  | 737.4985 | 1472.883 | 0 |
| PESEHPHAOPTIEQQQ               | 486.3774 | 1941.882 | 0 |
| PFDSDSIQFKLDDNFTAGNNN          | 590.4246 | 2358.04  | 0 |
| PFDSGRDGFVIGEGSVLVLEE          | 760.3191 | 2278.112 | 3 |
| PFIIAAHRQLSAM                  | 727.998  | 1453.786 | 2 |
| PFPSSLMLMPSINYLDV              | 639.413  | 1915.017 | 3 |
| PFSFLVPPQESQRR                 | 563.3025 | 1686.884 | 3 |
| PFSFLVPPQESQRR                 | 563.3025 | 1686.884 | 3 |
| PFSFLVPPQESQRR                 | 563.3014 | 1686.884 | 3 |
| PFSIGLSCDGPICEGSDGVLFPGQPIPSVK | 808.5804 | 3230.599 | 0 |
| PGHHGADTYIVQLPKDQVYRVP         | 623.4104 | 2489.282 | 0 |
| PGKKGH                         | 623.4095 | 622.3551 | 0 |
| PGNFPSSPF                      | 475.2192 | 948.4341 | 2 |
| PGNNYSSG                       | 383.1672 | 764.309  | 0 |
| PGNNYSSG                       | 383.1671 | 764.309  | 0 |
| PGNNYSSG                       | 383.1652 | 764.309  | 0 |
| PGNNYSSG                       | 383.1653 | 764.309  | 0 |
| PGQEDPPLTWALRLKI               | 612.0539 | 1833.015 | 3 |
| PGRNRHGA                       | 440.7751 | 879.4423 | 2 |
| PGVFTELIQ                      | 502.3713 | 1002.539 | 0 |

|                         |          |          |   |
|-------------------------|----------|----------|---|
| PGVKGCYVATGHNCWGILNGPAT | 772.3217 | 2314.099 | 3 |
| PHALALVSSFGI            | 606.3938 | 1210.671 | 2 |
| PHKFKLNFMS              | 441.279  | 1320.665 | 3 |
| PHKKPRGK                | 474.3152 | 946.5825 | 2 |
| PHNKAFNTTSP             | 405.2602 | 1212.589 | 0 |
| PHNYGET                 | 409.1613 | 816.3402 | 0 |
| PHSHVPPQYPQEWGNPNWPPN   | 644.4922 | 2574.183 | 0 |
| PHSHVPPQYPQEWGNPNWPPN   | 644.494  | 2574.183 | 0 |
| PHTFVIISLDPPI           | 483.6518 | 1447.808 | 3 |
| PIAVKRLSRTSK            | 678.4756 | 1354.841 | 0 |
| PIGCDGSEKDEFAD          | 371.3255 | 1481.598 | 0 |
| PIGCDGSEKDEFAD          | 371.3249 | 1481.598 | 0 |
| PIGGIEAPK               | 441.2999 | 880.5018 | 2 |
| PIIPR                   | 708.4887 | 707.4694 | 0 |
| PILPSLLSS               | 463.8406 | 925.5485 | 2 |
| PIMHRAVTSSNIL           | 360.3623 | 1437.776 | 0 |
| PINRKPHRSG              | 581.3605 | 1160.653 | 0 |
| PINTPKQQR               | 605.4205 | 1208.699 | 0 |
| PIRKALNRNFIVVGGYN       | 644.4693 | 1930.09  | 3 |
| PIRKQLNSSLFSF           | 513.0035 | 1535.846 | 3 |
| PIVYPPVVPKPIVT          | 808.5789 | 1614.975 | 0 |
| PKAIPSRLLLTGACF         | 794.0362 | 1585.901 | 2 |
| PKDLWERVKL              | 642.4225 | 1282.74  | 2 |
| PKDSIVSKVCELKNKK        | 606.1053 | 1815.029 | 3 |
| PKFKAIPLNKKIF           | 772.5015 | 1542.965 | 2 |
| PKKETAMKTYEVF           | 786.4093 | 1570.807 | 2 |
| PKKETAMKTYEVF           | 786.4079 | 1570.807 | 2 |
| PKLKVHCFHMSDEFKESF      | 786.0155 | 2355.118 | 3 |
| PKLRLAVLYSG             | 665.4701 | 1328.818 | 2 |
| PKRIYRNN                | 530.8498 | 1059.594 | 2 |
| PKRYFLYC                | 545.3703 | 1088.548 | 2 |
| PKSKPAKVAACKVAAKPAK     | 959.6294 | 1917.225 | 2 |
| PKVDIPSCFVGLVLENCE      | 981.4646 | 1960.964 | 2 |
| PKVESWSSEFSMIDWVKIF     | 772.3241 | 2314.134 | 3 |
| PKVPELSKPDMS            | 664.4361 | 1326.685 | 2 |
| PKVSKVLVKTEASNNSL       | 605.4189 | 1813.031 | 0 |
| PLAVPKVKPTLTF           | 705.9836 | 1409.865 | 2 |
| PLCIRHGS                | 441.8273 | 881.4542 | 2 |
| PLCSQAF                 | 383.166  | 764.3527 | 0 |
| PLDFSHSLLPAFFKHNNFS     | 555.2731 | 2217.101 | 0 |
| PLGQQSMAVLRKPE          | 523.9974 | 1568.835 | 3 |
| PLIQSKENPNEF            | 708.4612 | 1414.709 | 2 |
| PLITCVFG                | 425.2091 | 848.4466 | 0 |
| PLKALPLW                | 469.3271 | 936.5797 | 0 |
| PLKRIKYVNQSRN           | 808.5805 | 1614.932 | 0 |

|                           |          |          |   |
|---------------------------|----------|----------|---|
| PLLLQRRPSK                | 604.4391 | 1206.756 | 0 |
| PLLPISDPPKN               | 595.9193 | 1189.671 | 2 |
| PLLPKLHYIHP               | 664.4361 | 1326.781 | 2 |
| PLLVTLIIRNN               | 633.4252 | 1264.787 | 2 |
| PLNKSFTC                  | 455.3122 | 908.4426 | 0 |
| PLNMFQPETISS              | 455.3122 | 1362.649 | 0 |
| PLPLSSKHH                 | 508.3344 | 1014.561 | 2 |
| PLPVVLQDNRN               | 632.9174 | 1263.694 | 2 |
| PLQAPQNIQVASGVAARPG       | 469.3266 | 1873.017 | 0 |
| PLQSPSS                   | 455.3112 | 908.4603 | 0 |
| PLRKQISGATTGV             | 664.4361 | 1326.762 | 2 |
| PLSFSATYNSC               | 397.1811 | 1188.512 | 0 |
| PLSKGLLVFGLLLVF           | 808.5802 | 1615.011 | 0 |
| PLVLYLIASH                | 563.3702 | 1124.659 | 2 |
| PNAWNTHQCNKNSLTLTPQNHGGSD | 744.5803 | 2974.41  | 0 |
| PNFELNKN                  | 488.3311 | 974.4821 | 2 |
| PNFESILR                  | 488.3311 | 974.5186 | 2 |
| PNGDDEVSMTM               | 399.1389 | 1194.453 | 0 |
| PNLHTKETLA                | 562.3672 | 1122.603 | 2 |
| PNLSKLLPAK                | 540.9018 | 1079.67  | 2 |
| PNREMTVF                  | 497.3217 | 992.475  | 2 |
| PNVIGGKPRILLTGSPPKP       | 685.4319 | 2053.241 | 0 |
| PNVVFQSSKVHK              | 685.4283 | 1368.751 | 2 |
| PNWREIHR                  | 554.3709 | 1106.573 | 2 |
| PPCAKFVVAKYG              | 427.2796 | 1278.679 | 0 |
| PPDGNSY                   | 383.1649 | 764.2977 | 0 |
| PPGGVWQGDTTQDGFACPDYGF    | 772.3166 | 2313.964 | 3 |
| PPGMHKD                   | 399.1414 | 796.3538 | 0 |
| PPGMHKV                   | 383.1663 | 764.4003 | 0 |
| PPIIIPRTRPT               | 727.998  | 1453.877 | 2 |
| PPKCTKSS                  | 424.2705 | 846.4269 | 2 |
| PPKECCG                   | 367.1715 | 732.2935 | 0 |
| PPKIPNMS                  | 442.2947 | 882.4633 | 2 |
| PPKK                      | 469.3496 | 468.306  | 0 |
| PPKKVIKSAD                | 598.3967 | 1194.734 | 2 |
| PPKPPQTTA                 | 517.3689 | 1032.56  | 0 |
| PPLMRFLRN                 | 572.4127 | 1142.638 | 2 |
| PPLPPHQSH                 | 505.3491 | 1008.514 | 0 |
| PPNFETKSKAPPTEEVSE        | 497.4152 | 1985.958 | 0 |
| PPNFETKSKAPPTEEVSE        | 497.416  | 1985.958 | 0 |
| PPNGKKNWG                 | 499.2258 | 996.5141 | 2 |
| PPNGQSDQNALTHS            | 367.1709 | 1464.659 | 0 |
| PPNKKKRN                  | 491.3723 | 980.588  | 2 |
| PPNKKVVLV                 | 497.3306 | 992.6382 | 2 |
| PPNKKVVLV                 | 497.3335 | 992.6382 | 2 |

|                              |          |          |   |
|------------------------------|----------|----------|---|
| PPNKVNTI                     | 441.8273 | 881.4971 | 2 |
| PPNNNPASPSFSSSS <sup>d</sup> | 497.2326 | 1488.648 | 0 |
| PPNNNPASPSFSSSS <sup>d</sup> | 497.2341 | 1488.648 | 0 |
| PPNNNPASPSFSSSS <sup>d</sup> | 497.2299 | 1488.648 | 0 |
| PPNNNPASPSFSSSS <sup>d</sup> | 497.2332 | 1488.648 | 0 |
| PPNNNPASPSFSSSS <sup>d</sup> | 497.2327 | 1488.648 | 0 |
| PPNNNPASPSFSSSS <sup>d</sup> | 497.2337 | 1488.648 | 0 |
| PPNNNPASPSFSSSS <sup>d</sup> | 497.2337 | 1488.648 | 0 |
| PPNNNPASPSFSSSS <sup>d</sup> | 497.2328 | 1488.648 | 0 |
| PPNNNPASPSFSSSS <sup>d</sup> | 497.2313 | 1488.648 | 0 |
| PPNPTSLFGRMT                 | 439.8961 | 1316.655 | 3 |
| PPNQDTPTSPTAFT               | 497.2329 | 1488.673 | 0 |
| PPNRKRPKCSAEVEQKQNN          | 556.4412 | 2222.134 | 0 |
| PPNRYACLVAETAIDDPDS          | 512.414  | 2045.936 | 0 |
| PPNSFHHK                     | 482.3031 | 962.4722 | 2 |
| PPNSGNVVVAPP                 | 383.1674 | 1146.603 | 0 |
| PPNTSFGKRRK                  | 644.4143 | 1286.721 | 2 |
| PPNTSFGKRRK                  | 644.4156 | 1286.721 | 2 |
| PPNVFKPPN                    | 505.3889 | 1008.539 | 2 |
| PPNWAQASDN                   | 367.1708 | 1098.473 | 0 |
| PPPHSS                       | 311.1871 | 620.2918 | 2 |
| PPPPNLEEI                    | 503.3355 | 1004.518 | 2 |
| PPPPPPAAAGPPPHP              | 727.4573 | 1452.751 | 0 |
| PPPPSPDSNAVSKSTTPNAS         | 492.4591 | 1965.928 | 0 |
| PPPSPSTNNCPPPPSP             | 397.1791 | 1584.724 | 0 |
| PPPSQLQNSS                   | 381.1859 | 1140.541 | 0 |
| PPQIFQHELLQNF5               | 425.2116 | 1696.857 | 0 |
| PPQKVA                       | 639.4075 | 638.3752 | 0 |
| PPQNDKEET                    | 353.1562 | 1056.472 | 0 |
| PPQNILMMPTISDVSMVEE          | 533.4517 | 2130.005 | 0 |
| PPQQQQQQPPQSDDCS             | 453.3892 | 1809.759 | 0 |
| PPQQQQQQPPQSDDCS             | 453.3881 | 1809.759 | 0 |
| PPQSTPGRQSS                  | 381.1851 | 1140.552 | 0 |
| PPQSTPGRQSS                  | 381.1861 | 1140.552 | 0 |
| PPQSTPGRQSS                  | 381.1861 | 1140.552 | 0 |
| PPQSTPGRQSS                  | 381.1857 | 1140.552 | 0 |
| PPQVGKCLVH                   | 551.893  | 1101.666 | 2 |
| PPQWEFSCMEMYFGSE             | 525.4462 | 2097.78  | 0 |
| PPRANSSD                     | 422.2924 | 842.3882 | 2 |
| PPRKKKK                      | 441.3724 | 880.597  | 0 |
| PPRNGI                       | 653.3973 | 652.3657 | 0 |
| PPRPDWYEEFYASVMNSATKDYEAE    | 749.5345 | 2994.302 | 0 |
| PPRQONSTGPGCLEGLAALC         | 533.4518 | 2129.966 | 0 |
| PPRRSVRRRLVQSTLFPH           | 551.3509 | 2201.277 | 0 |
| PPRSFLPRYILSKLP              | 595.3887 | 1783.051 | 3 |

|                                 |          |          |   |
|---------------------------------|----------|----------|---|
| PPRVGPTSGCFSC                   | 425.212  | 1272.592 | 0 |
| PPSASGLPSA                      | 442.2947 | 882.4447 | 2 |
| PPSDMTFAYSDPDRSPYYN             | 556.4403 | 2221.926 | 0 |
| PPSKFLKIAL                      | 557.4118 | 1112.696 | 2 |
| PPSPLALPIIGH                    | 606.3935 | 1210.707 | 2 |
| PPSSPSFGAS                      | 467.305  | 932.424  | 2 |
| PPTFK                           | 295.1898 | 588.3271 | 2 |
| PPVGRSA                         | 683.433  | 682.3762 | 0 |
| PPVYN                           | 295.1898 | 588.2908 | 2 |
| PPYFNDKNMASDKQYL                | 483.3997 | 1929.893 | 0 |
| PQAASALKK                       | 913.5153 | 912.5392 | 0 |
| PQGKIVSKVYLCA                   | 469.3268 | 1404.78  | 0 |
| PQGNCYNPDTVVAHA                 | 397.1801 | 1584.699 | 0 |
| PQMTEGLKNWVAPTREFSTHQ           | 615.1365 | 2456.191 | 0 |
| PRAGRKGRIS                      | 549.4149 | 1096.658 | 2 |
| PRERKKHE                        | 540.354  | 1078.6   | 2 |
| PRIRLVRNR                       | 590.423  | 1178.747 | 0 |
| PRLVLLILFVS                     | 691.9681 | 1381.906 | 2 |
| PRPIVGIHRIVFVLF                 | 588.4114 | 1762.077 | 3 |
| PRRVPKKAPK                      | 588.8909 | 1175.762 | 2 |
| PRYKRN                          | 417.2957 | 832.4668 | 0 |
| PRYKRN                          | 417.2968 | 832.4668 | 0 |
| PSALDLKRSS                      | 537.4109 | 1072.588 | 0 |
| PSAPNYG                         | 353.1553 | 704.3129 | 0 |
| PSAPNYG                         | 353.1556 | 704.3129 | 0 |
| PSAPNYGNN                       | 467.2048 | 932.3988 | 0 |
| PSDDQSPQLTYNPQLDHGGWSRRGREF     | 786.5978 | 3142.46  | 0 |
| PSEDTKTENQDTSVSEKRSDSDESQQKSDSD | 865.6203 | 3458.468 | 0 |
| PSGAAGWHV                       | 441.2091 | 880.4191 | 0 |
| PSGNFMMNSMESFGGYGG              | 468.3885 | 1869.701 | 0 |
| PSHPPRRPS                       | 515.8631 | 1029.547 | 2 |
| PSLPKLHSH                       | 508.3344 | 1014.561 | 2 |
| PSNMINNAKNFAQPIMTVDDAPICGVLPQSN | 825.5536 | 3298.578 | 0 |
| PSSHN                           | 271.0604 | 540.2292 | 2 |
| PSSKAIMAEKIFNLAQKLGFEFVTKKF     | 786.5971 | 3142.725 | 0 |
| PSSVDPDDGSGEHNLSENYGTC          | 760.584  | 2278.892 | 0 |
| PSVLLLVMALAFGS                  | 527.6783 | 1579.868 | 3 |
| PTDILAHIPC                      | 540.3442 | 1078.548 | 2 |
| PTGSHNSSPPSHGHGSSPPSH           | 683.3071 | 2046.889 | 3 |
| PTGSHNSSPPSHGHGSSPPSH           | 683.3071 | 2046.889 | 3 |
| PTKKFKLPIKFL                    | 730.4748 | 1458.933 | 2 |
| PTKLHELILDINNNAL                | 966.5973 | 1931.048 | 2 |
| PTKLHELILDINNNAL                | 966.5973 | 1931.048 | 2 |
| PTKNAKKVVL                      | 549.415  | 1096.697 | 2 |
| PTKRKRVP                        | 491.3724 | 980.6243 | 2 |

|                       |          |          |   |
|-----------------------|----------|----------|---|
| PTKRKRVP              | 491.3723 | 980.6243 | 2 |
| PTKRYAGNL             | 510.345  | 1018.556 | 2 |
| PTPPPIGFGG            | 518.8879 | 1035.539 | 2 |
| PTRLLENKSSSFAQ        | 789.4372 | 1576.821 | 0 |
| PTSLKQFSH             | 522.8693 | 1043.54  | 2 |
| PTVDQLF               | 819.4501 | 818.4174 | 0 |
| PVATKILSIPLRRR        | 810.557  | 1619.036 | 0 |
| PVDSGF                | 311.1454 | 620.2806 | 0 |
| PVDSGF                | 311.1444 | 620.2806 | 0 |
| PVDSGF                | 311.1442 | 620.2806 | 2 |
| PVDSGF                | 311.1442 | 620.2806 | 2 |
| PVDSGF                | 311.1452 | 620.2806 | 2 |
| PVDSGF                | 311.1452 | 620.2806 | 2 |
| PVDSGF                | 311.1428 | 620.2806 | 0 |
| PVDSGF                | 311.1451 | 620.2806 | 0 |
| PVDSGF                | 311.144  | 620.2806 | 0 |
| PVEGPECGNMD           | 383.1659 | 1146.432 | 0 |
| PVERLTFEEFFNHP        | 441.2075 | 1760.852 | 0 |
| PVGLLDVVPQRLNWR       | 441.2961 | 1761.005 | 0 |
| PVIGKIGPYTVF          | 645.9706 | 1289.738 | 2 |
| PVIKNKLAIGSETK        | 499.9795 | 1496.893 | 3 |
| PVILVVNK              | 441.3714 | 880.5746 | 0 |
| PVKLSIGILPKN          | 639.9449 | 1277.807 | 2 |
| PVKVNSLLVFTF          | 455.3098 | 1362.791 | 0 |
| PVLTIPQN              | 441.3113 | 880.5018 | 2 |
| PVNCPLSAM             | 311.1455 | 930.4303 | 0 |
| PVNFYI                | 441.2073 | 880.433  | 0 |
| PVNFYI                | 441.2068 | 880.433  | 0 |
| PVNFYI                | 441.2061 | 880.433  | 0 |
| PVNFYI                | 441.2062 | 880.433  | 0 |
| PVNFYI                | 441.2947 | 880.433  | 2 |
| PVNMAFVWIICVAVS       | 441.297  | 1760.936 | 0 |
| PVNMLNVP              | 442.2947 | 882.4633 | 2 |
| PVNMVNHA              | 441.3091 | 880.4225 | 2 |
| PVNMVNHA              | 441.3157 | 880.4225 | 2 |
| PVNNGEMS              | 424.2741 | 846.3542 | 2 |
| PVNNGEMS              | 424.273  | 846.3542 | 2 |
| PVNNGEMS              | 424.2746 | 846.3542 | 2 |
| PVNNGEMS              | 424.2741 | 846.3542 | 2 |
| PVNQTSFS              | 440.2719 | 878.4134 | 2 |
| PVNTLNPQ              | 441.7656 | 881.4607 | 2 |
| PVNTNFAS              | 425.2125 | 848.4028 | 0 |
| PVPVPKRRRSS           | 639.9449 | 1277.768 | 2 |
| PVQNLGSCCFLQSGNLDYSSS | 555.4558 | 2217.967 | 0 |
| PVQNLLTP              | 441.3091 | 880.5018 | 2 |



|                                    |          |          |   |
|------------------------------------|----------|----------|---|
| PVQSVSSPDAKRV                      | 685.4325 | 1368.736 | 0 |
| PVRCFTCG                           | 441.7656 | 881.3888 | 2 |
| PVRCS                              | 561.3957 | 560.274  | 0 |
| PVREEDDDDDKSEVYSWFYMGMGIGF         | 772.5829 | 3086.295 | 0 |
| PVRFSWIKRCTELIFRN                  | 722.5042 | 2164.173 | 0 |
| PVRIPSTAGPVLY                      | 457.2705 | 1368.777 | 0 |
| PVRQHCQEL                          | 555.2743 | 1108.545 | 0 |
| PVSKSRLQLLGVSS                     | 735.9951 | 1469.857 | 2 |
| PVVERLYFH                          | 580.4083 | 1158.619 | 2 |
| PVVTKEGGGEGEEGNK                   | 397.3808 | 1585.758 | 0 |
| PVWNFC                             | 383.1672 | 764.3316 | 0 |
| PVWSCSS                            | 383.1656 | 764.3163 | 0 |
| PWPASGF                            | 381.1863 | 760.3544 | 0 |
| PWSEELKLVSHG                       | 691.4706 | 1380.704 | 2 |
| PYKLKLNKFA                         | 611.4013 | 1220.728 | 2 |
| QAAAKLKAG                          | 857.5595 | 856.5131 | 0 |
| QACASPTAVKIVIPAG                   | 746.4618 | 1490.846 | 2 |
| QAFVGKKPHL                         | 562.8704 | 1123.65  | 2 |
| QAFVVGATSHCST                      | 430.9042 | 1289.571 | 3 |
| QAICMSEYRKPELYYDLLRRKNSSNGMSF      | 875.6532 | 3498.685 | 0 |
| QAIQFFLGDIIQTKIHLFFSLSHHTFPIAN     | 904.6905 | 3614.867 | 0 |
| QAKKK                              | 293.2102 | 584.3646 | 2 |
| QALPAPPPGHMAIRS                    | 772.0238 | 1541.814 | 2 |
| QALSSHVWRHVSH                      | 772.5028 | 1542.78  | 2 |
| QAMLNAGLLPNVP                      | 669.4155 | 1336.717 | 2 |
| QAPSGYGS                           | 383.1666 | 764.2977 | 0 |
| QAVALRVG                           | 813.5287 | 812.4868 | 0 |
| QDESSETSSTSLFFTTSLGSVF             | 786.3396 | 2356.059 | 3 |
| QDMRNGFYEKLESELQGS                 | 533.4515 | 2129.969 | 0 |
| QEGEQPLVHDGP                       | 441.2067 | 1320.595 | 0 |
| QEGEQPLVHDGP                       | 441.2067 | 1320.595 | 0 |
| QEGEQPLVHDGP                       | 441.2077 | 1320.595 | 0 |
| QEGGSTSPIQPRKCRNRRRHGNDQSEILPSLASL | 1009.748 | 4035.057 | 0 |
| QEKREQVSSSESSEASQQQYITIRQ          | 760.5815 | 3038.491 | 0 |
| QENGKPGAELHLKV                     | 760.4857 | 1518.815 | 2 |
| QFGCLKTYNTF                        | 441.2058 | 1320.617 | 0 |
| QFPERYF                            | 493.8504 | 985.4658 | 2 |
| QFPERYF                            | 493.8508 | 985.4658 | 2 |
| QFVIQKVN                           | 488.3311 | 974.5549 | 2 |
| QGAHDRSRDEVTKVFDQQHFG              | 615.1382 | 2456.158 | 0 |
| QGCASDACRLYFQSVGDANNSVKPSKCF       | 788.6054 | 3150.443 | 0 |
| QGDIGVSKSTDKGATW                   | 413.2628 | 1648.806 | 0 |
| QGHITPMLKLAK                       | 668.9478 | 1335.77  | 2 |
| QGKKTTPVVAKLETK                    | 772.0228 | 1541.914 | 2 |
| QGLAAFTSS                          | 441.2973 | 880.4291 | 0 |

|                                     |          |          |   |
|-------------------------------------|----------|----------|---|
| QGLAAFTSS                           | 441.2999 | 880.4291 | 2 |
| QGLAAFTSS                           | 441.2962 | 880.4291 | 0 |
| QGPRTYLSPACHTMLTNEKRSFCHCLRN        | 816.6397 | 3262.537 | 0 |
| QGYMTSTTETWELSSLAH                  | 681.3088 | 2040.91  | 3 |
| QHGVDTNSVNNRDNGELINIGNHLNFNDASNDM   | 910.6647 | 3638.604 | 0 |
| QHTNYA                              | 367.1706 | 732.3191 | 0 |
| QIGVALYLLYTQVK                      | 537.0204 | 1607.929 | 3 |
| QIIVMRM                             | 437.2351 | 872.4612 | 0 |
| QISISRSS                            | 439.2769 | 876.4665 | 2 |
| QITNSS                              | 367.1714 | 732.329  | 0 |
| QIVKLGGRILEI                        | 669.9557 | 1337.84  | 2 |
| QKHPTFSH                            | 491.3338 | 980.4828 | 0 |
| QKQEAMWERQHELAADKIF                 | 786.6649 | 2357.159 | 3 |
| QKQECSVDSLSPNHGNELKNM               | 786.337  | 2356.043 | 3 |
| QKVAKMFKN                           | 538.8488 | 1075.585 | 2 |
| QLAAKVAEFLR                         | 623.4512 | 1244.724 | 2 |
| QLGDEVKKEGK                         | 685.4283 | 1368.736 | 2 |
| QLKVHILYTNV                         | 664.4351 | 1326.766 | 2 |
| QLPKLPF                             | 421.7935 | 841.5062 | 2 |
| QLPNCC                              | 339.1393 | 676.2673 | 0 |
| QLRLHEVAIAELNNQPS                   | 966.5973 | 1931.023 | 2 |
| QLWFLKRFFRKKKL                      | 969.6662 | 1937.188 | 0 |
| QMFIVNAGSGFKLLWNTAKGFLDPMTTAKIHVLGN | 955.7546 | 3819.001 | 0 |
| QMKKKRVN                            | 516.3864 | 1030.607 | 0 |
| QNELGFVSG                           | 467.2031 | 932.424  | 0 |
| QNKHRGTASTL                         | 606.8957 | 1211.637 | 2 |
| QNLLLGFSFL                          | 576.3834 | 1150.639 | 2 |
| QNRPVSLTFK                          | 595.3785 | 1188.662 | 0 |
| QPCALGDNLPH                         | 383.165  | 1146.513 | 0 |
| QPGQNTG                             | 351.1754 | 700.314  | 0 |
| QPGVKKSVRFAKNRN                     | 571.3785 | 1710.964 | 3 |
| QPHALPQATRATPR                      | 772.4838 | 1542.838 | 2 |
| QPHLQGC                             | 383.1648 | 764.3276 | 0 |
| QPIKPNNAHQNSA                       | 351.1748 | 1400.68  | 0 |
| QPKVP                               | 551.3546 | 550.3115 | 0 |
| QPLLVLGPPFMFPTFEAQLHNYRFL           | 773.1239 | 3088.6   | 4 |
| QPPNPVATLQLCIGHN                    | 568.0233 | 1700.867 | 3 |
| QPRKVHK                             | 438.2853 | 874.5137 | 2 |
| QPSVKAALLAKLR                       | 689.4901 | 1376.85  | 2 |
| QQHHKLIRSHLF                        | 772.5015 | 1542.853 | 2 |
| QQKCGNVIIPFPF                       | 369.1832 | 1472.749 | 4 |
| QQSFVVAILLGVFV                      | 760.4921 | 1518.881 | 2 |
| QQWQKPA                             | 443.3009 | 884.4504 | 0 |
| QRKSKQKKKLN                         | 758.0082 | 1513.942 | 2 |
| QRREQH                              | 413.2633 | 824.3889 | 0 |

|                                 |          |          |   |
|---------------------------------|----------|----------|---|
| QRTLHGLQVGESNKAKQHE             | 540.8618 | 2159.12  | 4 |
| QSPEQSLSVSSSDSSSSCSTNSTS        | 595.4483 | 2377.966 | 0 |
| QSTFDSIKCYLWKEECECLKWLDSQELNLVL | 941.6965 | 3762.798 | 0 |
| QSVVLETR                        | 466.3185 | 930.5134 | 2 |
| QTEQGVKYLLSYL                   | 771.4802 | 1540.814 | 0 |
| QTHHSSFYTNGGIDWHPNLRFEQNLVTRGDL | 910.666  | 3638.74  | 0 |
| QTHRFRKRKLLF                    | 815.5097 | 1628.974 | 0 |
| QTKKKRNLPOTP                    | 684.4717 | 1366.804 | 2 |
| QTLHAHLLKIGFHS                  | 801.4944 | 1600.884 | 0 |
| QTVLDPE                         | 426.1975 | 850.4072 | 2 |
| QTVSSSSTS                       | 295.1498 | 882.3931 | 0 |
| QVAKGRHAPCSGNNGTKSSFRN          | 766.9974 | 2298.104 | 3 |
| QVGVPSLV                        | 399.7835 | 797.4647 | 2 |
| QVVAVAVFLALGF                   | 667.4779 | 1332.781 | 2 |
| QVVAVEFDS                       | 497.2374 | 992.4815 | 2 |
| QVYDPCTVLTGVVF                  | 762.3184 | 1522.738 | 2 |
| QVYDPCTVLTGVVF                  | 762.3227 | 1522.738 | 2 |
| QWFQSIPVN                       | 559.8896 | 1117.556 | 2 |
| QWIVRKRKR                       | 635.4152 | 1268.794 | 2 |
| QWQLSALGEIALV                   | 714.4522 | 1426.782 | 2 |
| RAATPSLLICAESQNGTDTTSAHYNFDLF   | 786.5955 | 3142.467 | 0 |
| RAFATGRKF                       | 527.4024 | 1052.588 | 2 |
| RASDITENNNTS                    | 441.2061 | 1320.591 | 0 |
| RCDPNWEKNRKRRLADCALGFGHGTGGK    | 772.5842 | 3086.504 | 0 |
| RCRLRLK                         | 529.371  | 1056.67  | 0 |
| RDAAAALSTK                      | 502.3734 | 1002.546 | 0 |
| REKGPPMK                        | 471.8371 | 941.5117 | 2 |
| REVTGASHVF                      | 551.893  | 1101.557 | 2 |
| RFDGSQK                         | 419.2513 | 836.4141 | 2 |
| RFDGSQK                         | 419.3142 | 836.4141 | 0 |
| RFDGSQK                         | 419.2497 | 836.4141 | 2 |
| RFDGSQK                         | 419.2513 | 836.4141 | 2 |
| RFDGSQK                         | 419.2513 | 836.4141 | 2 |
| RFDGSQK                         | 419.2499 | 836.4141 | 2 |
| RFRITKHKL                       | 628.4067 | 1254.767 | 2 |
| RFHHFRDGFC                      | 441.2087 | 1320.593 | 0 |
| RFHHFRDGFC                      | 441.2097 | 1320.593 | 0 |
| RFKAS                           | 608.3858 | 607.3442 | 0 |
| RFKEMVASK                       | 548.3518 | 1094.591 | 2 |
| RFKSKFPK                        | 519.3438 | 1036.618 | 2 |
| RFSFIGK                         | 854.5789 | 853.481  | 0 |
| RGFRFLCQAET                     | 664.4351 | 1326.65  | 2 |
| RGGKLMKLSVLK                    | 729.4785 | 1456.928 | 2 |
| RGLSSLYKEIIDTVRKEA              | 520.3332 | 2077.153 | 0 |
| RGPRSPSWKCSDFV                  | 811.4166 | 1620.783 | 2 |

|                                     |          |          |   |
|-------------------------------------|----------|----------|---|
| RGSCSSLSAN                          | 491.2396 | 980.4346 | 2 |
| RGVQONQOGSPGLSWWSPTTAKSGGEQDERGRSSP | 939.7074 | 3754.78  | 0 |
| RGYKCLMN                            | 505.3503 | 1008.554 | 2 |
| RGYKRKSI                            | 504.3285 | 1006.604 | 2 |
| RHFDSYG                             | 441.2053 | 880.3828 | 0 |
| RHFDSYG                             | 441.2056 | 880.3828 | 0 |
| RHLELPSDSSLLFNLDVADESLRKN           | 746.5642 | 2982.505 | 0 |
| RIATVKNHAHA                         | 540.9015 | 1079.62  | 2 |
| RIGTDAHL                            | 441.8273 | 881.4719 | 2 |
| RIHEKAAPKKPS                        | 681.4926 | 1360.794 | 2 |
| RIPEIKSH                            | 490.3563 | 978.561  | 2 |
| RIPNFS                              | 367.1715 | 732.3918 | 0 |
| RIRGGIVVIFKK                        | 693.459  | 1384.903 | 2 |
| RIRKLADNCT                          | 595.3817 | 1188.64  | 0 |
| RIVLIKIRN                           | 562.9143 | 1123.755 | 2 |
| RIWNKLRCK                           | 665.4701 | 1328.786 | 2 |
| RKERKGDMI                           | 378.2113 | 1131.618 | 0 |
| RKKKERVKKK                          | 664.4619 | 1326.894 | 0 |
| RKKKKRSSSSKRS                       | 825.551  | 1648.981 | 0 |
| RKKLPFCVGLLLRLLRKNLRFVFTCTSG        | 808.5802 | 3229.915 | 0 |
| RKLRILCLHGFRQASSFKGRTASLAKK         | 797.4668 | 3185.82  | 0 |
| RKLRILCLHGFRQASSFKGRTASLAKK         | 797.4684 | 3185.82  | 0 |
| RKRSVVH                             | 441.2956 | 880.5355 | 0 |
| RKTKHVKKNR                          | 647.9425 | 1293.811 | 2 |
| RKYRTKKK                            | 554.3709 | 1106.704 | 2 |
| RLARPDVFKIVH                        | 761.483  | 1520.894 | 2 |
| RLHQIYKLE                           | 664.4351 | 1326.741 | 2 |
| RLLASKSCNHISM                       | 487.3219 | 1458.744 | 0 |
| RLLRRLKSLN                          | 461.3217 | 1380.904 | 0 |
| RLPAVIGGSC                          | 486.8235 | 971.5222 | 2 |
| RLPNGELPSGFLGYAVTM                  | 481.2364 | 1920.977 | 0 |
| RLPNNSF                             | 424.2717 | 846.4348 | 2 |
| RLPSSSS                             | 367.171  | 732.3766 | 0 |
| RLPVKSLQFKTVCKSWLSH                 | 593.4015 | 2369.341 | 0 |
| RLQTLITLGNLFG                       | 537.0205 | 1607.904 | 3 |
| RLQTVYF                             | 463.8406 | 925.5021 | 2 |
| RLSGHQK                             | 413.2555 | 824.4617 | 2 |
| RLTSWKSWDDPSSGDIVWEVVI              | 644.4945 | 2574.275 | 0 |
| RLVKRVIKHQEV                        | 809.5364 | 1617.02  | 0 |
| RNARGIIIAGHRGG                      | 483.3206 | 1446.828 | 3 |
| RNEQQCSFVEHRN                       | 412.3403 | 1645.738 | 0 |
| RNEQQCSFVEHRN                       | 412.3399 | 1645.738 | 0 |
| RNEQQCSFVEHRN                       | 412.3402 | 1645.738 | 0 |
| RNEQQCSFVEHRN                       | 412.3411 | 1645.738 | 0 |
| RNGKSRIVSKEVF                       | 760.4836 | 1518.863 | 2 |

|                              |          |          |   |
|------------------------------|----------|----------|---|
| RNGLAPKK                     | 442.351  | 882.5399 | 0 |
| RNIQQSM                      | 438.787  | 875.4283 | 2 |
| RNRLMRK                      | 487.329  | 972.5764 | 2 |
| RNTAFI                       | 721.4831 | 720.3918 | 0 |
| RNTTLTFSRRN                  | 455.9526 | 1364.727 | 3 |
| RPAKVLGKTSIN                 | 642.4225 | 1282.772 | 2 |
| RPFKPLLNAIS                  | 628.4067 | 1254.745 | 2 |
| RPGPPLKIIPF                  | 617.9318 | 1233.76  | 2 |
| RPHPYTKRKLGCN                | 523.9974 | 1568.836 | 3 |
| RPHVAVH                      | 815.5113 | 814.4562 | 0 |
| RPINCM                       | 367.1697 | 732.3411 | 0 |
| RPINCM                       | 367.1705 | 732.3411 | 0 |
| RPINCM                       | 367.1708 | 732.3411 | 0 |
| RPKKKGYRRHT                  | 713.9824 | 1425.843 | 2 |
| RPKNNKVPVGPRL                | 738.4732 | 1474.873 | 2 |
| RPRVPIITFI                   | 606.3935 | 1210.755 | 2 |
| RQKSLENTEHNMNEVRTGS          | 773.0081 | 2316.088 | 3 |
| RRALRALKGVVRIQALVRG          | 711.4614 | 2131.366 | 0 |
| RRDILIGLGG                   | 535.3994 | 1068.64  | 2 |
| RRDRRAVVN                    | 571.4282 | 1140.659 | 2 |
| RRFSKMIR                     | 547.3317 | 1092.634 | 0 |
| RRKGLIKKA                    | 535.3997 | 1068.724 | 2 |
| RRKGSNK                      | 423.3621 | 844.4991 | 0 |
| RRKHKVF                      | 485.854  | 969.5984 | 2 |
| RRKPRVCKNKEEAETQRITHITVERNRR | 876.6541 | 3502.924 | 0 |
| RRKRRKGLK                    | 599.3921 | 1196.805 | 0 |
| RRKSEN                       | 789.4375 | 788.4253 | 0 |
| RRKVVKLV                     | 997.6912 | 996.692  | 0 |
| RRLASIFM                     | 497.2996 | 992.559  | 2 |
| RRLRPSRR                     | 548.8989 | 1095.685 | 2 |
| RRNFKGNKK                    | 574.4278 | 1146.674 | 0 |
| RRRVGLTGFK                   | 595.3771 | 1188.72  | 0 |
| RSFLKRGYIAN                  | 479.9712 | 1436.825 | 3 |
| RSSLNVVAAEKGVVVGR            | 581.0477 | 1740.001 | 3 |
| RSSTKPHNHKNGC                | 367.1708 | 1464.7   | 0 |
| RSVKVLPVSRGDG                | 685.4283 | 1368.784 | 2 |
| RSYNNNEEGGFA                 | 352.3559 | 1405.59  | 0 |
| RTPRHGKHSRNNNPFHLVPEEG       | 645.49   | 2578.301 | 0 |
| RTPRKKMTKQ                   | 637.4669 | 1272.745 | 2 |
| RTSLFV                       | 722.5027 | 721.4123 | 0 |
| RVKLGFKIF                    | 554.371  | 1106.696 | 2 |
| RVLPLRRLH                    | 580.4082 | 1158.746 | 2 |
| RVLPLRRLH                    | 580.3847 | 1158.746 | 2 |
| RVRLKPGF                     | 486.823  | 971.6028 | 2 |
| RYIW                         | 319.2236 | 636.3384 | 2 |

|                                              |          |          |   |
|----------------------------------------------|----------|----------|---|
| RYKKGTSQ                                     | 484.2976 | 966.5247 | 2 |
| SAFAKPVQRRRKKGLDFRKW                         | 825.5524 | 2473.429 | 0 |
| SAFGKTGEKG                                   | 491.3311 | 980.4927 | 0 |
| SAKGYKMKT                                    | 507.3645 | 1012.538 | 2 |
| SAKPRLSPKP                                   | 540.9015 | 1079.645 | 2 |
| SAQILAKVQAAAKNNKKQASVKVVKPAEEVIDIEAGPDKEVQKN | 943.5485 | 4712.619 | 5 |
| SAQILAKVQAAAKNNKKQASVKVVKPAEEVIDIEAGPDKEVQKN | 943.5484 | 4712.619 | 5 |
| SAQILAKVQAAAKNNKKQASVKVVKPAEEVIDIEAGPDKEVQKN | 943.5472 | 4712.619 | 5 |
| SAQILAKVQAAAKNNKKQASVKVVKPAEEVIDIEAGPDKEVQKN | 943.5472 | 4712.619 | 5 |
| SARLIKGMK                                    | 502.3724 | 1002.601 | 0 |
| SASAKRSHEWISASSGGEELNFRQRSNSPGGQSVEPA        | 997.6902 | 3986.886 | 0 |
| SASKKTK                                      | 375.2504 | 748.4443 | 0 |
| SAVIKLLKKFIR                                 | 708.4626 | 1414.939 | 2 |
| SAVKERPTLGGDTIGIIDIAFGS                      | 773.0081 | 2316.232 | 3 |
| SCLKKK                                       | 706.507  | 705.4207 | 0 |
| SCNLDDDFSIDFTWFA                             | 511.4301 | 2041.841 | 0 |
| SCPKSNCCKEGCGFG                              | 760.198  | 1518.572 | 0 |
| SCRKK                                        | 311.1849 | 620.3428 | 2 |
| SCSPCVR                                      | 376.259  | 750.3153 | 0 |
| SCYAVGLH                                     | 425.1352 | 848.3851 | 0 |
| SDFLALNNAS                                   | 351.1757 | 1050.498 | 0 |
| SDNKLVGS                                     | 819.449  | 818.4134 | 0 |
| SDPPKSHDADDKLF                               | 786.3582 | 1570.726 | 2 |
| SEEGQALMAMKALF                               | 763.3296 | 1524.732 | 2 |
| SEKVTRTRI                                    | 545.371  | 1088.63  | 2 |
| SENAGNKQHONIASNGNS                           | 935.4463 | 1868.836 | 2 |
| SENKPTLLWKMPQNPS                             | 935.4949 | 1868.945 | 0 |
| SERRSRFAS                                    | 548.3516 | 1094.558 | 2 |
| SESAYSDPRVNTESSEVNEPGDNSYKESNTPHI            | 910.6645 | 3638.588 | 0 |
| SEVVDLVLSLDVSDDDVDGLLKRWIGRFA                | 808.5792 | 3230.682 | 0 |
| SFGKSLFPM                                    | 507.3619 | 1012.505 | 2 |
| SFNQHFDDIC                                   | 409.1613 | 1224.487 | 0 |
| SFQDPGLIHGQTQAGANQTQTPSNDQSLF                | 772.5836 | 3086.433 | 0 |
| SFQDPGLIHGQTQAGANQTQTPSNDQSLF                | 772.5839 | 3086.433 | 0 |
| SFSNRASRLSSN                                 | 663.3461 | 1324.648 | 2 |
| SFSSSSIC                                     | 409.1614 | 816.3324 | 0 |
| SFTLKKTITL                                   | 576.3834 | 1150.696 | 2 |
| SGDPLEDFCETNPADEEC                           | 493.3848 | 1969.719 | 0 |
| SGGVGLLLLIFS                                 | 661.9582 | 1321.765 | 2 |
| SGILIAGGTAAYVQSRFRVNXHDLFGHCNGHN             | 860.6646 | 3438.712 | 0 |
| SGLDSTTA                                     | 376.2608 | 750.3395 | 2 |
| SGMRKTRRK                                    | 560.4135 | 1118.646 | 0 |
| SGNGNHQHNNKKNK                               | 423.361  | 1689.804 | 0 |
| SGQCD                                        | 255.065  | 508.1588 | 2 |
| SGQYTAKSAYGVLWGEMFEEQQDGVF                   | 732.5475 | 2926.312 | 0 |

|                                                     |          |          |   |
|-----------------------------------------------------|----------|----------|---|
| SGRHALRKRLEELGYELNDDQVQTLF                          | 772.5821 | 3086.59  | 0 |
| SGRKALQT                                            | 430.8365 | 859.4875 | 2 |
| SGRNKNSS                                            | 425.2151 | 848.41   | 0 |
| SGRYGGGRR                                           | 965.5078 | 964.4951 | 0 |
| SHASSNY                                             | 383.1667 | 764.309  | 0 |
| SHFLKLVHPGGF                                        | 669.9557 | 1337.725 | 2 |
| SHGHNHTSHYPMH                                       | 771.3309 | 1540.638 | 2 |
| SHKNEESC                                            | 467.2024 | 932.3658 | 0 |
| SHKRWFL                                             | 487.323  | 972.5294 | 0 |
| SHKTTSLFL                                           | 517.3697 | 1032.56  | 0 |
| SHMPLIKQGPDH                                        | 680.4198 | 1358.677 | 2 |
| SHNNFKAS                                            | 452.8032 | 903.4199 | 2 |
| SIKILPVGIIHIGLQ                                     | 808.5786 | 1614.982 | 0 |
| SIKRNFTNSM                                          | 599.3905 | 1196.597 | 0 |
| SILLTSHGVDHLSSKF                                    | 581.0463 | 1739.921 | 3 |
| SILYPKSELP                                          | 573.9063 | 1145.633 | 2 |
| SIQALADDAELKQFRDPR                                  | 519.1139 | 2072.065 | 0 |
| SIQKLEKLPN                                          | 705.9836 | 1409.861 | 2 |
| SIKQLV                                              | 408.2761 | 814.4913 | 2 |
| SIQNQCT                                             | 397.1806 | 792.3436 | 0 |
| SIVLTCVLELRW                                        | 716.4594 | 1430.796 | 2 |
| SKAEGGPDKKRNAAADFLKRIKRNTSAEASKGGSGGGGGGGSSSSSKGGGG | 857.219  | 5137.523 | 6 |
| SKFKPVKN                                            | 474.3152 | 946.56   | 2 |
| SKHVRSIVIGVGLMVCQ                                   | 609.4097 | 1825.007 | 3 |
| SKKEEQDKLNCCEECASSYEKEAQLF                          | 760.5816 | 3038.331 | 0 |
| SKKRNGGGR                                           | 515.8631 | 1029.616 | 2 |
| SKLAKEIAATVLLN                                      | 735.9954 | 1469.882 | 2 |
| SKLGVSEKLAM                                         | 581.9034 | 1161.643 | 2 |
| SKLIAGDSDFFAV                                       | 685.4317 | 1368.693 | 0 |
| SKLKSLDLRRSKI                                       | 772.5015 | 1542.957 | 2 |
| SKSISNGT                                            | 397.3027 | 792.3978 | 2 |
| SKSTSKVKASSK                                        | 619.4356 | 1236.704 | 0 |
| SKSWNVFAEILEKTHIITVPGSGFGPGGE                       | 765.1537 | 3056.561 | 0 |
| SKVRQVIN                                            | 472.3359 | 942.561  | 2 |
| SLAALKLLKLLPGDVM                                    | 421.3226 | 1681.021 | 0 |
| SLAMADEPVSRGDSPS                                    | 405.3501 | 1617.731 | 0 |
| SLAPEQIDAEGETVSWTSGLIFGKGEGIVGQ                     | 794.5634 | 3174.572 | 0 |
| SLCDDLRLVKGQDF                                      | 537.0204 | 1607.798 | 3 |
| SLGIIFLQILTAS                                       | 688.4383 | 1374.812 | 2 |
| SLIVRAPITPIV                                        | 639.9449 | 1277.807 | 2 |
| SLKTLGNKAMQSCK                                      | 767.4547 | 1532.871 | 0 |
| SLLQIQLLVALR                                        | 683.9714 | 1365.871 | 2 |
| SLLSDPASKP                                          | 507.8671 | 1013.539 | 2 |
| SLLSDPASKP                                          | 507.8672 | 1013.539 | 2 |
| SLNIPAQN                                            | 428.8003 | 855.445  | 2 |

|                                 |          |          |   |
|---------------------------------|----------|----------|---|
| SLNPHPPR                        | 459.3455 | 916.4879 | 2 |
| SLRTINSS                        | 439.2769 | 876.4665 | 2 |
| SLRTINSS                        | 439.2769 | 876.4665 | 2 |
| SLSFSSNCHVSSSAQATLQQQHEQQPLP    | 760.5832 | 3038.415 | 0 |
| SLSMLEDIR                       | 532.3572 | 1062.538 | 2 |
| SMDLFCCKAF                      | 595.376  | 1188.567 | 0 |
| SMKSAYLADQRHR                   | 781.8971 | 1561.778 | 2 |
| SMRCVR                          | 376.2591 | 750.3629 | 0 |
| SNGYIFVGMETSAVE                 | 535.3579 | 1602.724 | 0 |
| SNIVTTSS                        | 455.2217 | 908.4451 | 0 |
| SNIVTTSS                        | 455.3106 | 908.4451 | 0 |
| SNKGKVSVAKKRK                   | 477.2957 | 1428.889 | 0 |
| SNKINNCG                        | 425.2108 | 848.381  | 0 |
| SNLTFNAMICGF                    | 439.8803 | 1316.589 | 0 |
| SNLVK                           | 560.4137 | 559.3329 | 0 |
| SNRLNSLNEM                      | 393.2851 | 1176.556 | 0 |
| SNSQNRAG                        | 417.292  | 832.3787 | 2 |
| SPCEPEESSLELTDNYPL              | 506.4773 | 2021.878 | 0 |
| SPIIETRSRYPFQ                   | 797.4004 | 1592.831 | 2 |
| SPKGGSG                         | 295.2259 | 588.2867 | 2 |
| SPKPHIQTRFDVAVAIGFALLFFMLVFS    | 788.6061 | 3150.709 | 0 |
| SPLFWIKLKNLF                    | 761.483  | 1520.876 | 2 |
| SPPPPSPKAPKK                    | 443.3026 | 1326.766 | 0 |
| SPQGNHL                         | 441.2632 | 880.4403 | 2 |
| SPRMKILQRIAYL                   | 795.0384 | 1587.928 | 2 |
| SPSHN                           | 271.0602 | 540.2292 | 2 |
| SPSIMKQDVAQDNTNSYSKNS           | 772.313  | 2314.038 | 3 |
| SPSPQKPPPDVVRKERKK              | 519.1117 | 2072.186 | 0 |
| SPSPQKPPPDVVRKERKK              | 519.111  | 2072.186 | 0 |
| SQKIIYLLECNQQIHQQNAQLKEKVF      | 786.5976 | 3142.66  | 0 |
| SQLLTILKHNIKL                   | 507.6702 | 1519.945 | 3 |
| SQVQPKYLI                       | 538.3389 | 1074.607 | 2 |
| SQYQDFLL                        | 507.3536 | 1012.487 | 0 |
| SRALLTLRGK                      | 557.9144 | 1113.698 | 2 |
| SRCFDVGCSSS                     | 383.1672 | 1146.443 | 0 |
| SRCFDVGCSSS                     | 383.1653 | 1146.443 | 0 |
| SRHKMC                          | 381.1854 | 760.3472 | 0 |
| SRKGLNKGKRVILP                  | 783.5668 | 1564.989 | 2 |
| SRPKLSFALGS                     | 581.9046 | 1161.651 | 2 |
| SRSRSRSGSPRHRRE                 | 685.4126 | 2053.086 | 3 |
| SSASHQPNGGDNNYNLNFSTSTGLAGYN    | 772.6086 | 3086.36  | 0 |
| SSCNCGSCNG                      | 311.1457 | 930.263  | 0 |
| SSDHVKAFDSAESWQSYWKEIKDSPK      | 764.549  | 3054.436 | 0 |
| SSGEQYRLHVTTVSADSDMEMEDDITLSD   | 808.5802 | 3230.387 | 0 |
| SSGSPQHTENAFGRVEWSDGKHLVGSPISVN | 820.5942 | 3278.571 | 0 |



|                                     |          |          |   |
|-------------------------------------|----------|----------|---|
| SSILQQQPWSIPPVPSFNPNP               | 778.3344 | 2332.185 | 3 |
| SSIRARKIYVGLPAS                     | 405.3499 | 1616.936 | 0 |
| SSKGHGKISGF                         | 552.8816 | 1103.572 | 2 |
| SSKSSNLKFTGHH                       | 477.3175 | 1428.711 | 0 |
| SSLFNKSS                            | 435.3061 | 868.4291 | 0 |
| SSLKSSSTLNAPGCSNATGACVYKASYGDTSF    | 772.5838 | 3086.396 | 0 |
| SSNCDFTAQLAGFMAS                    | 550.5015 | 1648.686 | 0 |
| SSPDIYNPQAGSITTATSLDFP              | 766.9974 | 2298.054 | 3 |
| SSPKPKLGQC                          | 551.3507 | 1100.565 | 0 |
| SSRIALGNILKFRKKNWQ                  | 720.5242 | 2158.249 | 0 |
| SSRKRKRKR                           | 615.4544 | 1228.77  | 2 |
| SSRSRASDITENNNTS                    | 435.3584 | 1737.788 | 0 |
| SSSALAELDSQEDALYALKVSLNASPNQLTNWNKN | 948.716  | 3790.865 | 0 |
| SSSFSVSCSLMENQETHN                  | 497.415  | 1985.809 | 0 |
| SSSTNGT                             | 327.2006 | 652.2664 | 2 |
| SSVERAFSAMKIIKSKLRN                 | 722.5022 | 2164.215 | 0 |
| SSVNLKK                             | 388.2538 | 774.46   | 0 |
| SSVNLKK                             | 388.253  | 774.46   | 0 |
| SSVRV                               | 274.2739 | 546.3126 | 2 |
| SSVRV                               | 274.2738 | 546.3126 | 2 |
| STFVKSGSEAI                         | 563.37   | 1124.571 | 2 |
| STLKSTVNSP                          | 517.3678 | 1032.545 | 0 |
| STQIRNCSK                           | 518.8427 | 1035.513 | 2 |
| STRQYIK                             | 895.5025 | 894.4923 | 0 |
| STVANILSVAS                         | 531.384  | 1060.576 | 0 |
| SVKGSKTEWMSMSRNWGQNWQ               | 632.4692 | 2526.153 | 0 |
| SVKGSKTEWMSMSRNWGQNWQ               | 632.4711 | 2526.153 | 0 |
| SVKSKQPASK                          | 530.4028 | 1058.608 | 0 |
| SVLIFSILN                           | 559.8898 | 1117.675 | 2 |
| SVSGKTGNKNNK                        | 617.4026 | 1232.647 | 0 |
| SVVYNNTT                            | 449.2876 | 896.424  | 0 |
| SWKPVGVSRS                          | 595.3807 | 1188.625 | 0 |
| SWRVVVN                             | 430.2895 | 858.4712 | 2 |
| SYDGQFLASGC                         | 383.1654 | 1146.465 | 0 |
| SYKNAFKK                            | 493.3102 | 984.5392 | 0 |
| SYKPLKKKTYRDEKDGSRFQRIEDGDHKKLIEA   | 1009.751 | 4035.129 | 0 |
| SYNDFCNA                            | 467.0997 | 932.3334 | 0 |
| SYNENVFKGLDFIIEAGKNGIRLILSLVNNWN    | 935.497  | 3737.942 | 0 |
| SYNKLQVSHNK                         | 439.8961 | 1316.684 | 3 |
| SYNLFTC                             | 424.2713 | 846.3582 | 2 |
| SYNVNQNVSQN                         | 423.1957 | 1266.548 | 0 |
| SYNYVCV                             | 424.2705 | 846.3582 | 2 |
| SYDPNSGYGQGGYTYEQQQ                 | 560.4126 | 2237.914 | 0 |
| SYQNWRWQPHHCDLT                     | 493.3835 | 1969.864 | 0 |
| SYSRDRNYS                           | 383.1654 | 1146.505 | 0 |

|                                   |          |          |   |
|-----------------------------------|----------|----------|---|
| SYVSSTQCASAIRRRVMA                | 497.2326 | 1984.994 | 0 |
| TACIPNSKDSSSHKDETSLQRELRNAECMAS   | 881.6138 | 3522.577 | 0 |
| TAHHR                             | 311.1849 | 620.3143 | 2 |
| TARAAPYAKARTQFSRDIQMTRHNSNNYGN    | 860.6659 | 3438.671 | 0 |
| TARTMGSDANMKYNLTW                 | 533.4523 | 2129.962 | 0 |
| TDHDLILLSH                        | 582.3703 | 1162.598 | 2 |
| TFKPRFFQKKPL                      | 513.0035 | 1535.898 | 3 |
| TFRK                              | 551.3523 | 550.3228 | 0 |
| TFSSSLHNRNPLF                     | 760.4921 | 1518.758 | 2 |
| TFVLYLGPHIALFTL                   | 569.0659 | 1703.965 | 3 |
| TGPPKWIKVNERRTLHDVVK              | 796.5398 | 2386.36  | 0 |
| TGREIVFQGFNWESWRRRWYL             | 697.4454 | 2785.399 | 0 |
| TGRYEAHLWDNSCRREGQT               | 760.319  | 2278.03  | 3 |
| THARWFN                           | 466.3185 | 930.446  | 2 |
| THILRSLASQN                       | 620.4099 | 1238.673 | 2 |
| THMRAKSG                          | 444.3045 | 886.4443 | 2 |
| THNNQTDIVFVRNSGFCQDGTLI           | 645.4875 | 2578.223 | 0 |
| THNSILCCDFNYVNLNSQRGT             | 600.4679 | 2398.079 | 0 |
| THNSSNH                           | 467.2049 | 932.3849 | 0 |
| THQNSF                            | 367.1709 | 732.3191 | 0 |
| THQNSF                            | 367.1715 | 732.3191 | 0 |
| THQNSF                            | 367.1711 | 732.3191 | 0 |
| THQPLASPHNPNDKAHASSSTSTRHMAQWE    | 831.6277 | 3322.529 | 0 |
| THQILEQQMNC                       | 369.1832 | 1472.639 | 4 |
| TIGNTLSSVPFLLMSLIPG               | 519.1119 | 2072.159 | 0 |
| TIMVKLGREV                        | 573.4029 | 1144.664 | 2 |
| TIPLNSTC                          | 425.2087 | 848.395  | 0 |
| TIPLNSTC                          | 425.2111 | 848.395  | 0 |
| TIPRALHLGVN                       | 595.9194 | 1189.693 | 2 |
| TIYARYI                           | 450.2958 | 898.4913 | 2 |
| TIYKAVSEV                         | 505.3503 | 1008.549 | 2 |
| TKGFYLLGLEKSSPTFAAAM              | 711.4603 | 2131.102 | 0 |
| TKGRRSMK                          | 963.5951 | 962.5444 | 0 |
| TKHVVGTYGYLPPEYIIDGAYSTKSDVFSFGVL | 910.6619 | 3638.818 | 0 |
| TKKPKRVDS                         | 529.8798 | 1057.624 | 2 |
| TKPFNINN                          | 474.3148 | 946.4872 | 2 |
| TKVLKPSKCAF                       | 667.436  | 1332.813 | 0 |
| TLALCYN                           | 399.3061 | 796.3789 | 0 |
| TLGEASLRVKRN                      | 672.4336 | 1342.768 | 2 |
| TLIKGLGSH                         | 463.2991 | 924.5392 | 2 |
| TLIKGLGSH                         | 463.2986 | 924.5392 | 2 |
| TLIMLSVIRN                        | 588.3919 | 1174.674 | 2 |
| TLKAKPTHDRKK                      | 712.0105 | 1421.847 | 2 |
| TLKNQSTDPSIYSEAQYVGSS             | 569.4708 | 2274.065 | 0 |
| TLLEKSQAKLVN                      | 672.4336 | 1342.782 | 2 |

|                                          |          |          |   |
|------------------------------------------|----------|----------|---|
| TLLALAGKLGK                              | 599.3936 | 1196.786 | 0 |
| TLLTSKASAIKALSAPLQ                       | 628.7575 | 1883.109 | 3 |
| TLNKKKN                                  | 423.3555 | 844.5131 | 2 |
| TLNKKKN                                  | 423.3623 | 844.5131 | 0 |
| TLPQDSTCTLPCSLTETDPSTF                   | 786.3353 | 2356.045 | 3 |
| TLRRIPSSPSLLLGIKK                        | 627.1062 | 1878.178 | 3 |
| TLTGDPADNRRNVFNILSGTSM                   | 595.4483 | 2378.165 | 0 |
| TLTLVFKRN                                | 546.3964 | 1090.65  | 2 |
| TLTLVFKRN                                | 546.3964 | 1090.65  | 2 |
| TLVSLLYLIKPLF                            | 760.4877 | 1518.943 | 2 |
| TNDIEILHTDTLIKEVEKVF                     | 786.3332 | 2356.253 | 3 |
| TNLFYYLIVLVSV                            | 772.5015 | 1542.87  | 2 |
| TNVLLKTKS                                | 502.3716 | 1002.607 | 0 |
| TPAPAPAPAPLLPP                           | 663.3461 | 1324.739 | 2 |
| TPAPAPAPAPLLPP                           | 663.3461 | 1324.739 | 2 |
| TPFYCSQFQLPSNSNN                         | 462.4487 | 1845.799 | 0 |
| TPKSLIGNLTN                              | 579.4249 | 1156.645 | 2 |
| TPLIPVPPKSLIF                            | 711.504  | 1420.869 | 2 |
| TPLLREIFH                                | 641.4213 | 1280.735 | 2 |
| TPLVGIYSIIH                              | 606.8972 | 1211.691 | 2 |
| TPNKAFQTVIK                              | 659.4802 | 1316.745 | 2 |
| TPPPVIGKI                                | 461.3621 | 920.5695 | 2 |
| TPQWRAGPL                                | 513.3854 | 1024.545 | 2 |
| TPSSNAPVSGFGS                            | 441.2802 | 1320.595 | 3 |
| TPTMGTTPTTGTSTGTGTGTGTTGTTTPYSTTPGVLGGIG | 983.7122 | 3930.853 | 0 |
| TPYFPLPKPY                               | 611.9134 | 1221.643 | 2 |
| TQKILLRSPVTRRR                           | 607.7579 | 1820.122 | 3 |
| TRTKGVRRN                                | 544.413  | 1086.637 | 2 |
| TSKGKIPLSKAPIRNNKG                       | 502.3714 | 2005.18  | 0 |
| TSRKGYLAISA                              | 413.2647 | 1236.683 | 0 |
| TSVGKDRPRQKN                             | 693.3832 | 1384.754 | 2 |
| TSYTCLISAYGKQK                           | 781.8971 | 1561.781 | 2 |
| TTANGRVG                                 | 388.2536 | 774.3984 | 0 |
| TTFIQKST                                 | 463.3267 | 924.4916 | 0 |
| TTFIQKST                                 | 463.3273 | 924.4916 | 0 |
| TTHVMYINFYLLDYGWNMIVCVVMAM               | 786.599  | 3142.45  | 0 |
| TPVTT                                    | 619.4379 | 618.3224 | 0 |
| TVLKSKKKKS                               | 573.9063 | 1145.75  | 2 |
| TVLKSKKKKS                               | 573.9063 | 1145.75  | 2 |
| TVPVVSSTTT                               | 496.3276 | 990.5233 | 2 |
| TWHANGRNCDGMGHAC                         | 467.4047 | 1865.726 | 0 |
| TWIKLEKKIS                               | 623.4512 | 1244.749 | 2 |
| TYQKGKSKNP                               | 639.9449 | 1277.709 | 2 |
| TYSIVMEVLGYCGYLEEAEAVFFEMKQN             | 816.6381 | 3262.491 | 0 |
| TYWNLKGQNSG                              | 423.197  | 1266.599 | 0 |

|                                  |          |          |   |
|----------------------------------|----------|----------|---|
| VADLISVVEVAASD                   | 694.4468 | 1386.724 | 2 |
| VAIPSPISVPLNDKPPKN               | 472.3601 | 1885.067 | 0 |
| VAIYTDIV                         | 447.3069 | 892.4906 | 0 |
| VAKASSTASAAAAAADRKQKASVFSRISF    | 760.5821 | 3038.626 | 0 |
| VALIFYGHIARVVAFFCLV              | 705.51   | 2113.216 | 0 |
| VALPCRVCRCGKGF                   | 469.3265 | 1404.748 | 0 |
| VALPQEC                          | 380.2466 | 758.3633 | 2 |
| VANRIVLP                         | 441.2967 | 880.5494 | 0 |
| VAPIRLPVDLALSL                   | 492.9949 | 1475.908 | 3 |
| VAPLLIPHQ                        | 494.3191 | 986.5913 | 2 |
| VASSGIVSLLL                      | 529.8798 | 1057.638 | 2 |
| VAVKRIHSVLVL                     | 667.4361 | 1332.861 | 0 |
| VCLVMTIGN                        | 475.3274 | 948.4772 | 2 |
| VCQGGNLRKKFYRKSCPQAEQIVRTK       | 760.1988 | 3036.623 | 0 |
| VCWRTL                           | 389.2645 | 776.4003 | 0 |
| VDDHCGLLLPGNLFHIFFKNNSAYHDVHHQLY | 941.7025 | 3762.815 | 0 |
| VDEGQCD                          | 383.1659 | 764.2647 | 0 |
| VDHLIVRGG                        | 483.3032 | 964.5454 | 2 |
| VDRFLNSGILIEILSH                 | 609.3945 | 1825.01  | 0 |
| VDYVLVVF                         | 477.3173 | 952.527  | 0 |
| VENMCHFADGKRYYPFGRGSGSQVVQQ      | 794.5618 | 3174.44  | 0 |
| VEVIPIPN                         | 440.8135 | 879.5066 | 2 |
| VFALNSMLPHTHAGTSSRELF            | 772.3231 | 2314.153 | 3 |
| VFEYRIPKQ                        | 590.4227 | 1178.645 | 0 |
| VFLWNKKHNAKEAKQVQN               | 546.3996 | 2181.181 | 0 |
| VFQERLNL                         | 531.3856 | 1060.578 | 0 |
| VFRRGGALCVVG                     | 617.418  | 1232.681 | 2 |
| VGfyECGRVERHHVLVGKT              | 547.3971 | 2185.122 | 0 |
| VGGGVVGPLLAAGP                   | 582.3694 | 1162.671 | 2 |
| VGGTIKHISWVHN                    | 483.3206 | 1446.773 | 3 |
| VGLLCGCT                         | 383.1647 | 764.3561 | 0 |
| VGLLGFGC                         | 383.1656 | 764.3891 | 0 |
| VGPVAVGVKSG                      | 485.353  | 968.5655 | 2 |
| VGRGIMGYL                        | 483.3032 | 964.5164 | 2 |
| VGVPMAFTFEIYGDGTASSRDCFKMFNP     | 772.5826 | 3086.398 | 0 |
| VHALVTASCRGLVDVVETLIKCGVDAS      | 689.5168 | 2754.441 | 0 |
| VHGFYKM                          | 441.2617 | 880.4266 | 2 |
| VHGFYKM                          | 441.3157 | 880.4266 | 2 |
| VHGFYKM                          | 441.2068 | 880.4266 | 0 |
| VHGFYKM                          | 441.2963 | 880.4266 | 0 |
| VHIRKRVKASK                      | 441.2802 | 1320.847 | 3 |
| VHKKLQK                          | 440.8135 | 879.5654 | 2 |
| VHLIIPKKQ                        | 538.3779 | 1074.691 | 2 |
| VHNNAF                           | 351.174  | 700.3293 | 0 |
| VHNNAF                           | 351.175  | 700.3293 | 0 |

|                                       |          |          |   |
|---------------------------------------|----------|----------|---|
| VHNNAF                                | 351.1764 | 700.3293 | 0 |
| VHNNAF                                | 351.1763 | 700.3293 | 0 |
| VHNNAF                                | 351.1754 | 700.3293 | 0 |
| VHNNGVFTLPATSQIS                      | 595.3783 | 1782.926 | 0 |
| VHNQLGSSQLH                           | 610.3956 | 1218.611 | 2 |
| VHNTPCNVNVGFG                         | 453.2064 | 1356.625 | 0 |
| VHNTTVFS                              | 452.8041 | 903.445  | 2 |
| VHPGSVTGTGTGTVSFMQERNNNAGYSLAVPTTGNEI | 941.7019 | 3762.791 | 0 |
| VHRIIKMKKLYGGVLI                      | 623.4103 | 1867.159 | 0 |
| VHRPFIRKA                             | 562.356  | 1122.678 | 2 |
| VHSFR                                 | 323.1452 | 644.3394 | 2 |
| VHSSIFSLKKLEK                         | 758.4735 | 1514.882 | 2 |
| VHSVFATS                              | 424.2705 | 846.4236 | 2 |
| VHVDCHSTMSNETGDICDLGQFRRLILSPLYVKE    | 969.7344 | 3874.88  | 0 |
| VIAIQGKISFGSF                         | 456.288  | 1365.766 | 3 |
| VIGIQYLQYAHKK                         | 780.9461 | 1559.882 | 2 |
| VILEFH                                | 757.469  | 756.4171 | 0 |
| VILLRLPLRN                            | 603.9162 | 1205.797 | 2 |
| VILLRLPLRN                            | 603.907  | 1205.797 | 2 |
| VILPIQMOKK                            | 599.3929 | 1196.731 | 0 |
| VIPLKLPGLKHILVGDEKQ                   | 737.4807 | 2209.356 | 0 |
| VIRLHQNNFS                            | 614.3796 | 1226.652 | 2 |
| VIRTSVGGRNG                           | 558.4031 | 1114.621 | 2 |
| VITVRHEKKVVF                          | 727.9979 | 1453.877 | 2 |
| VIVAHRLNTIRN                          | 703.5068 | 1404.831 | 2 |
| VKDFLILNLSTV                          | 681.4929 | 1360.797 | 2 |
| VKEKKKPN                              | 485.854  | 969.5971 | 2 |
| VKEKTTSH                              | 465.3193 | 928.4978 | 2 |
| VKELKPVK                              | 470.8311 | 939.6117 | 2 |
| VKKSRRKGKIN                           | 579.425  | 1156.741 | 2 |
| VKLGTOQLVLLLI                         | 683.9713 | 1365.896 | 2 |
| VKPLSLMRSVAVGTG                       | 758.0119 | 1513.865 | 2 |
| VKPLSNAFVINVGDM                       | 535.3689 | 1602.844 | 3 |
| VKSNSKSKITI                           | 602.9103 | 1203.719 | 2 |
| VKSVRPRG                              | 449.8241 | 897.5508 | 2 |
| VKTLEDEKIALL                          | 686.4493 | 1370.802 | 2 |
| VKVEVTHGKN                            | 555.8443 | 1109.619 | 2 |
| VKVGTPILLRN                           | 661.9583 | 1321.845 | 2 |
| VLDDATHHHHHEC                         | 388.3928 | 1549.648 | 0 |
| VLDIILVPIASEKQ                        | 513.3752 | 1536.913 | 0 |
| VLEEQWWMRYIKLN                        | 925.5143 | 1848.992 | 0 |
| VLGAAIVVIGF                           | 529.8806 | 1057.654 | 2 |
| VLGSVLLGASV                           | 507.8671 | 1013.612 | 2 |
| VLGVDFASVHIYPDSWISQSVADSHLPFI         | 800.6123 | 3198.603 | 0 |
| VLGVKNANSRVGR                         | 685.4283 | 1368.795 | 2 |

|                                      |          |          |   |
|--------------------------------------|----------|----------|---|
| VLIEKGKLGKRRVS                       | 778.055  | 1553.998 | 2 |
| VLIEPKNALAKQ                         | 662.4816 | 1322.792 | 0 |
| VLIPFLKKKM                           | 406.3263 | 1215.778 | 0 |
| VLKLA AQN                            | 428.8009 | 855.5178 | 2 |
| VLKTLEMDEEY                          | 685.4335 | 1368.648 | 0 |
| VLKWLSLAQHNNVV                       | 535.3689 | 1602.925 | 3 |
| VLLVLLAIVGM                          | 620.4098 | 1238.804 | 2 |
| VLNHPSIGVFLTHCGWNSTTES               | 600.4679 | 2398.138 | 0 |
| VLQNYKVNFIG                          | 696.4341 | 1390.761 | 2 |
| VLRKKPDFRRK                          | 721.9681 | 1441.899 | 2 |
| VLVDNRERDSGSM                        | 493.3084 | 1476.699 | 0 |
| VLVGNKVVG EIAGPNK                    | 797.4634 | 1592.925 | 0 |
| VLVGNKVVG EIAGPNK                    | 797.4685 | 1592.925 | 0 |
| VLVLPFPFQ                            | 538.3403 | 1074.611 | 2 |
| VNGTCCEKYCGCSKHCSNRFRGCR             | 678.4756 | 2710.123 | 0 |
| VNHKA EKKKYVLKKI                     | 609.3943 | 1825.13  | 0 |
| VNIDSQCSADKFPVMDGKVQSETPCQEIPSIAS    | 881.6132 | 3522.632 | 0 |
| VNMKGLDGIQGPMYVGTGCVFNRQALYGYSPPSMPK | 969.7307 | 3874.867 | 0 |
| VNPNNYE                              | 425.2139 | 848.3665 | 0 |
| VNPNNYE                              | 425.2085 | 848.3665 | 0 |
| VNPRWLVIHKLKLALFVDKI                 | 801.4947 | 2401.473 | 0 |
| VNPVKYLNLR                           | 608.3841 | 1214.714 | 0 |
| VNQLLEQKELTFDVS DYLVYMTSVDIN         | 816.6375 | 3262.575 | 0 |
| VNSHFLERLY                           | 639.4431 | 1276.656 | 2 |
| VNVALTCHH                            | 497.2327 | 992.4862 | 0 |
| VNYGMHGVTRSCGECAICLEEFV GQ           | 708.4871 | 2830.218 | 0 |
| VPAVCGFSGLPLFPSQSQRNRDSNNTP          | 963.489  | 2887.404 | 0 |
| VPCIPAI                              | 413.2651 | 824.483  | 0 |
| VPCIPAI                              | 413.2628 | 824.483  | 0 |
| VPDNSAKALSR YTEMVDDVI                | 556.4369 | 2222.089 | 0 |
| VPGLAAALL                            | 441.2971 | 880.5382 | 0 |
| VPGVDLKRR                            | 520.3324 | 1038.63  | 0 |
| VPGVDLKRR                            | 520.3334 | 1038.63  | 0 |
| VPHLNWQ                              | 447.3078 | 892.4556 | 0 |
| VPKGGVADAQ                           | 941.5076 | 940.4978 | 0 |
| VPKKVVAHLLKPRGWKPP                   | 513.4105 | 2049.273 | 0 |
| VPKRLNPQTS                           | 570.3664 | 1138.646 | 2 |
| VPNAAPPES                            | 441.2065 | 880.4291 | 0 |
| VPNAAYAGPPGG                         | 564.3597 | 1126.541 | 0 |
| VPNALIPGT                            | 441.2961 | 880.5018 | 0 |
| VPNFFKTSHASS                         | 441.2967 | 1320.646 | 0 |
| VPNFFKTSHASS                         | 441.2068 | 1320.646 | 0 |
| VPNGGVEIHLVKNRET                     | 441.2969 | 1760.953 | 0 |
| VPNIYIY                              | 441.3091 | 880.4695 | 2 |
| VPNIYIY                              | 441.3157 | 880.4695 | 2 |

|                                        |          |          |   |
|----------------------------------------|----------|----------|---|
| VPNIYIY                                | 441.2967 | 880.4695 | 0 |
| VPNIYIY                                | 441.2999 | 880.4695 | 2 |
| VPNKLVVL                               | 441.3157 | 880.5746 | 2 |
| VPNKLVVL                               | 441.297  | 880.5746 | 0 |
| VPNKLVVL                               | 441.3132 | 880.5746 | 2 |
| VPNKLVVL                               | 441.2958 | 880.5746 | 0 |
| VPNKLVVLN                              | 498.348  | 994.6175 | 2 |
| VPNLAMKLEALRDEY                        | 441.2952 | 1760.913 | 0 |
| VPNMEVQSCSID                           | 441.2962 | 1320.569 | 0 |
| VPNMEVQSCSID                           | 441.2072 | 1320.569 | 0 |
| VPNMEVQSCSID                           | 441.2045 | 1320.569 | 0 |
| VPNMTHIA                               | 441.7656 | 881.4429 | 2 |
| VPNMTHIA                               | 441.8273 | 881.4429 | 2 |
| VPNMTHIA                               | 441.8273 | 881.4429 | 2 |
| VPNMTHIA                               | 441.7656 | 881.4429 | 2 |
| VPNMTHIA                               | 441.7656 | 881.4429 | 2 |
| VPNNQFPGAWGS                           | 425.2133 | 1272.589 | 0 |
| VPNNQFPGAWGS                           | 425.2127 | 1272.589 | 0 |
| VPNNYDMI                               | 499.2258 | 996.4222 | 2 |
| VPNPDGIIG                              | 441.2977 | 880.4655 | 0 |
| VPNYLFE                                | 441.3132 | 880.433  | 2 |
| VPPKPLLIHVASSAFSFCNFGHDHDKDKGSLSSSDNES | 1057.718 | 4226.997 | 0 |
| VPPSSTSS                               | 381.1864 | 760.3603 | 0 |
| VPPSSTSS                               | 381.1861 | 760.3603 | 0 |
| VPPSSTSS                               | 381.1854 | 760.3603 | 0 |
| VPPSSTSS                               | 381.1852 | 760.3603 | 0 |
| VPPSSTSS                               | 381.1863 | 760.3603 | 0 |
| VPPSSTSS                               | 381.1865 | 760.3603 | 0 |
| VPQNSTPCA                              | 458.812  | 915.412  | 2 |
| VPRKIIR                                | 441.3091 | 880.597  | 2 |
| VPRKIIR                                | 441.3113 | 880.597  | 2 |
| VPRKRNI                                | 441.8273 | 881.5559 | 2 |
| VPRKRNI                                | 441.8273 | 881.5559 | 2 |
| VPRKRNI                                | 441.8273 | 881.5559 | 2 |
| VPRKSVSFAKIAVP                         | 500.3448 | 1497.903 | 3 |
| VPRLREIIN                              | 555.3414 | 1108.672 | 2 |
| VPRNDVFS                               | 467.3159 | 932.4716 | 0 |
| VPRRIKL                                | 441.2971 | 880.597  | 0 |
| VPVPSGGFNFS                            | 554.3718 | 1106.54  | 2 |
| VPWNDLGFSVNNTVWLSC                     | 513.4105 | 2049.962 | 0 |
| VPWYNS                                 | 383.1659 | 764.3494 | 0 |
| VQIYKAPWSIRDK                          | 802.5187 | 1602.888 | 2 |
| VQLASLIGLLIRH                          | 478.3202 | 1431.893 | 3 |
| VQLNLLLP                               | 455.3106 | 908.5695 | 0 |
| VREQGGRVLVH                            | 625.4224 | 1248.705 | 2 |

|                                     |          |          |   |
|-------------------------------------|----------|----------|---|
| VREVFIARRRKTG                       | 419.3139 | 1672.985 | 0 |
| VRLLLF                              | 760.5838 | 759.5007 | 0 |
| VRPKRVLQR                           | 576.4109 | 1150.741 | 2 |
| VRPPSVLAEKNNAEKTTRRSRTREISS         | 771.4849 | 3081.676 | 0 |
| VRVRIQNNFLSGT                       | 752.4873 | 1502.832 | 2 |
| VSASLYK                             | 767.4549 | 766.4225 | 0 |
| VSETVAGVVTIRAF                      | 483.6518 | 1447.804 | 3 |
| VSIGPE                              | 301.1388 | 600.3119 | 2 |
| VSKKR                               | 617.4037 | 616.402  | 0 |
| VSMVPT                              | 317.2078 | 632.3204 | 2 |
| VSPLNLPSLPIP                        | 623.9572 | 1245.733 | 2 |
| VSQGNKWCDFCKIY                      | 423.3622 | 1689.764 | 0 |
| VSQVSENNSLTS                        | 455.3112 | 1362.663 | 0 |
| VSYLNRS                             | 463.2998 | 924.4665 | 0 |
| VTEALVNKCQLVFLPRLGADHIINARMFSRKLKVG | 1009.75  | 4035.275 | 0 |
| VTGLQLIFSARVPIIKVT                  | 652.4083 | 1954.198 | 0 |
| VTILPTLVINNR                        | 676.9495 | 1351.819 | 2 |
| VTLRFLCRLN                          | 617.9318 | 1233.702 | 2 |
| VTNRKKAP                            | 913.5134 | 912.5505 | 0 |
| VTNRKKAP                            | 913.5141 | 912.5505 | 0 |
| VTPVVTT                             | 815.5121 | 814.48   | 0 |
| VTSRVAFPKFGTPYVLKPLAHE              | 615.1364 | 2456.358 | 0 |
| VVEGKLRPK                           | 513.3869 | 1024.639 | 2 |
| VVEIGPLIVN                          | 526.886  | 1051.628 | 2 |
| VVELSVALHH                          | 552.3605 | 1102.614 | 2 |
| VVELSVALHH                          | 552.3605 | 1102.614 | 2 |
| VVGEAGPLKR                          | 513.3869 | 1024.603 | 2 |
| VVHPRNGS                            | 433.2911 | 864.4566 | 0 |
| VVIPSAGFSH                          | 507.3645 | 1012.534 | 2 |
| VVKKCVGVIKQSG                       | 737.5008 | 1472.839 | 0 |
| VVKKIRPHVLLGLSG                     | 808.5806 | 1615.03  | 0 |
| VVKNGT                              | 617.4035 | 616.3544 | 0 |
| VVKPPVTIPPIN                        | 637.4669 | 1272.781 | 2 |
| VVKVNSNPQENLTKKQ                    | 913.5167 | 1825.006 | 0 |
| VVKYLAELPQN                         | 637.4669 | 1272.708 | 2 |
| VVLAGH                              | 595.3798 | 594.3489 | 0 |
| VVLDELLKLLPLKSRVFVV                 | 727.4583 | 2179.371 | 0 |
| VVLLLVWFS                           | 538.3447 | 1074.648 | 2 |
| VVLLLVWFS                           | 538.3447 | 1074.648 | 2 |
| VVLMK                               | 295.2259 | 588.3669 | 2 |
| VVLMK                               | 295.226  | 588.3669 | 2 |
| VVNKYKGLGAKSVT                      | 732.4769 | 1462.851 | 2 |
| VVNNGPRPAHT                         | 581.3817 | 1160.605 | 0 |
| VVNVTTGENEDR                        | 667.2889 | 1332.616 | 2 |
| VVQLAQRNSS                          | 551.3518 | 1100.594 | 0 |



|                                     |          |          |   |
|-------------------------------------|----------|----------|---|
| VVQQQQMP                            | 957.5045 | 956.475  | 0 |
| VVRSS                               | 274.2739 | 546.3126 | 2 |
| VVSKKLRFKKT                         | 667.4776 | 1332.861 | 2 |
| VVSLGAIGLLKSFRV                     | 780.026  | 1557.961 | 2 |
| VVYAGLIM                            | 433.2911 | 864.4779 | 0 |
| VVYPVYRN                            | 505.3889 | 1008.539 | 2 |
| VVYPVYRN                            | 505.3889 | 1008.539 | 2 |
| VVYVILLC                            | 461.3176 | 920.5405 | 2 |
| VWIDKIVPRWIF                        | 786.4819 | 1570.903 | 2 |
| VWPNHL                              | 383.1649 | 764.397  | 0 |
| VYIIYSSH                            | 491.3333 | 980.4967 | 0 |
| VYIKSCDKLDKIF                       | 786.4763 | 1570.843 | 2 |
| VYIKSCDKLDKIF                       | 786.507  | 1570.843 | 2 |
| VYIKSCDKLDKIF                       | 786.507  | 1570.843 | 2 |
| VYIKSCDKLDKIF                       | 786.4774 | 1570.843 | 2 |
| VYQNNNSSSS                          | 367.1699 | 1098.458 | 0 |
| VYQNNNSSSS                          | 367.1714 | 1098.458 | 0 |
| VYRNRISPDPIFLTTEAPSVGGFYAINRRGQVLL  | 955.754  | 3819.058 | 0 |
| WAECHQ                              | 387.1737 | 772.2963 | 2 |
| WAEHTGTIEACFKE                      | 811.4167 | 1620.724 | 2 |
| WALNCVATTDQGENDPSSLWLNPEIKDS        | 776.5708 | 3102.424 | 0 |
| WERILVKYG                           | 582.4087 | 1162.65  | 2 |
| WGSGRGGHGDSDGYGGRNNDSDGYGGRGNDAGYGG | 808.5797 | 3230.328 | 0 |
| WIGEP                               | 301.1421 | 600.2908 | 2 |
| WIVKFLLR                            | 601.9441 | 1201.734 | 2 |
| WKAKNFS                             | 440.7735 | 879.4603 | 2 |
| WKERRL                              | 444.3045 | 886.5137 | 2 |
| WKERRL                              | 444.3045 | 886.5137 | 2 |
| WKGCFGKKSLE                         | 685.4283 | 1368.686 | 2 |
| WKLVS                               | 632.4721 | 631.3693 | 0 |
| WKRMAVSWTG                          | 611.3525 | 1220.612 | 0 |
| WKWSLTG                             | 439.2888 | 876.4494 | 2 |
| WLLPILA                             | 413.2657 | 824.516  | 0 |
| WMFRDQRVTDN                         | 734.3191 | 1466.673 | 2 |
| WNKPANK                             | 429.3174 | 856.4556 | 0 |
| WNKPANK                             | 429.3156 | 856.4556 | 0 |
| WNSTLKKRLKANTSTPS                   | 966.5973 | 1931.059 | 2 |
| WRLPALGPSHVLQ                       | 737.5011 | 1472.825 | 0 |
| WRWQPKGCDLPRFNATKMLELIRGKR          | 800.6112 | 3198.717 | 0 |
| WSDRGSLWADDCSLSFATN                 | 533.4507 | 2129.911 | 0 |
| WSIRRKIAIGAAR                       | 375.3226 | 1496.905 | 0 |
| WTGTDCCHNWyGISDRN                   | 533.4506 | 2129.814 | 0 |
| WTHTDCAIREQLICMGPSAKNGAGPSEIVF      | 808.58   | 3230.531 | 0 |
| WVGIALFFLAF                         | 642.4225 | 1282.711 | 2 |
| WVHQYL                              | 423.1981 | 844.4232 | 0 |

|                                            |          |          |   |
|--------------------------------------------|----------|----------|---|
| WVPCTGC                                    | 383.1667 | 764.2986 | 0 |
| WVPCTGC                                    | 383.166  | 764.2986 | 0 |
| WVPCTGC                                    | 383.166  | 764.2986 | 0 |
| WVPCTGC                                    | 383.1652 | 764.2986 | 0 |
| WVTGLLIKAI                                 | 557.412  | 1112.696 | 2 |
| WYNHCLLRYNTPSYSTLNTSSPS                    | 705.5093 | 2818.266 | 0 |
| YAECGDIENSRKVFDGVCLGERCEALWNTLL            | 876.6549 | 3502.632 | 0 |
| YAEQQLNAY                                  | 367.1722 | 1098.498 | 0 |
| YAEQQLNAY                                  | 367.1705 | 1098.498 | 0 |
| YAKGIGL                                    | 721.5011 | 720.4171 | 0 |
| YAQELMSLNLEEGSSGQD                         | 493.3846 | 1969.858 | 0 |
| YAQKTLPPRKK                                | 665.4701 | 1328.793 | 2 |
| YCNNEYGNITTET                              | 381.1883 | 1520.609 | 0 |
| YCPATKCPALSEDDNLYDDF                       | 760.5816 | 2278.94  | 0 |
| YCVWENNLHQHNNHWN                           | 513.4108 | 2049.865 | 0 |
| YDFGMMGE                                   | 483.1742 | 964.3306 | 2 |
| YDHIIPYSKGGES                              | 367.1717 | 1464.689 | 0 |
| YDNLIFHRVIKGFMI                            | 467.3148 | 1865.002 | 0 |
| YEKMLENLKCLKD                              | 551.3677 | 1650.902 | 3 |
| YFGVDNEVGSLDWASIV                          | 468.4403 | 1869.879 | 0 |
| YFKCSYA                                    | 441.2058 | 880.3789 | 0 |
| YFKCSYA                                    | 441.2064 | 880.3789 | 0 |
| YFNLQNAPEQNLSPADDDGHGT                     | 601.4633 | 2402.041 | 0 |
| YFNYKD                                     | 425.2114 | 848.3705 | 0 |
| YFNYKD                                     | 425.2112 | 848.3705 | 0 |
| YFSVKFG                                    | 424.2721 | 846.4276 | 2 |
| YFVVCIGIGPEIRTMGKNGY                       | 555.4565 | 2218.055 | 0 |
| YGGDISRKKK                                 | 576.409  | 1150.646 | 0 |
| YGGRRDQDPGNQDWNNHRN                        | 766.9986 | 2298.002 | 3 |
| YGKNELFDSEYLW                              | 555.2745 | 1662.757 | 0 |
| YGKNPVTIKGIK                               | 659.4802 | 1316.782 | 2 |
| YGNYGDAYASYGDYGYGN                         | 525.4464 | 2097.786 | 0 |
| YGQALPSYSNSSYGAGYTQTPAYT                   | 637.4777 | 2546.124 | 0 |
| YGQLSISLPVARNCL                            | 409.2173 | 1632.866 | 0 |
| YGRGSIVRGG                                 | 511.3148 | 1020.546 | 2 |
| YGRILSQCLVNT                               | 683.9714 | 1365.708 | 2 |
| YGRKQQQK                                   | 518.3412 | 1034.562 | 2 |
| YGRQRKALKM                                 | 625.9286 | 1249.708 | 2 |
| YGRQRKALKM                                 | 625.9286 | 1249.708 | 2 |
| YGRQRKALKM                                 | 625.9298 | 1249.708 | 2 |
| YGTPVLQPFPPPN                              | 476.3064 | 1425.729 | 0 |
| YGWVA                                      | 595.3766 | 594.2802 | 0 |
| YICSRYYRAPELIFGATEY TASIDIWSAGCVLAELLGQPLF | 786.3422 | 4712.37  | 6 |
| YIEWGLKEPIKKVTEI                           | 649.4456 | 1945.092 | 0 |
| YIGLVADTLRN                                | 617.9318 | 1233.672 | 2 |

|                                |          |          |   |
|--------------------------------|----------|----------|---|
| YIHLVQKK                       | 514.859  | 1027.618 | 2 |
| YIKLHH                         | 405.7843 | 809.4548 | 2 |
| YIRNKNIRKLREEEGHFCQKIR         | 708.4878 | 2829.53  | 0 |
| YKDPQERERRF                    | 762.3227 | 1522.764 | 2 |
| YKIEEKKK                       | 533.3463 | 1064.623 | 2 |
| YKINITRGSK                     | 590.4237 | 1178.677 | 0 |
| YLLISKKRYAGLF                  | 786.5389 | 1570.924 | 2 |
| YLMKLGL                        | 837.5853 | 836.483  | 0 |
| YLQWQQW                        | 351.1758 | 1050.492 | 0 |
| YLTRKN                         | 794.5619 | 793.4446 | 0 |
| LYEWKQSLDDPDSSLSSWNNR          | 676.4982 | 2702.225 | 0 |
| YMKNASQ                        | 421.292  | 840.38   | 2 |
| YMSFYNVFFTSPLVIALGVF           | 772.3166 | 2314.175 | 3 |
| YMWGNANDS                      | 353.156  | 1056.397 | 0 |
| YNCERVISLDKHDGI                | 441.2957 | 1760.852 | 0 |
| YNILSTVKLTFAASLMSNSC           | 541.4406 | 2162.075 | 0 |
| YNRLGRDMAYYPPAENLNEEPLDEAV     | 760.582  | 3038.408 | 0 |
| YNVPSKKAFN                     | 584.3801 | 1166.608 | 2 |
| YNYGLNRTSSF                    | 441.2074 | 1320.61  | 0 |
| YRECDIYGTVDFIGNAAAVFQNCNI      | 736.5298 | 2942.337 | 0 |
| YRNSRGSQGNDNRNRKSFEDFDGPSRQSY  | 831.6263 | 3322.521 | 0 |
| YRRGAKPRKQGF                   | 732.4827 | 1462.827 | 2 |
| YRSQKYHSEK                     | 663.3461 | 1324.652 | 2 |
| YRVGSKK                        | 419.2505 | 836.4868 | 2 |
| YRVGSKK                        | 419.2998 | 836.4868 | 2 |
| YSATCHILGHYG                   | 441.2061 | 1320.592 | 0 |
| YSGLLISRALSFSNFS               | 441.2955 | 1760.91  | 0 |
| YSKECQ                         | 379.1707 | 756.3112 | 0 |
| YSQSSKSS                       | 437.2106 | 872.3876 | 0 |
| YSRAHKPQLVLD                   | 476.3238 | 1425.773 | 3 |
| YTEKTGFKTCNAC                  | 367.171  | 1464.638 | 0 |
| YTKLIQIH                       | 508.3337 | 1014.586 | 2 |
| YTLPYNLLDWNQAKNSC              | 511.4311 | 2041.957 | 0 |
| YTLVASKKMV                     | 570.3698 | 1138.642 | 2 |
| YTVDEGSRLQRLFWCDTESQLLYGVFGDIL | 881.6153 | 3522.713 | 0 |
| YVDAIGVY                       | 450.2942 | 898.4437 | 2 |
| YVKMQYCVSCDIHSMLGMMHKGPVSLVS   | 786.5985 | 3142.46  | 0 |
| YWFFFSPVDFKYSRSKRFRNTT         | 720.524  | 2878.434 | 0 |
| YYKQENARKGL                    | 457.2701 | 1368.715 | 0 |
| YYPACPEPELTMGTSRHTDGNFMTI      | 708.5061 | 2830.24  | 0 |

Prec m/z: Precursor mass-to-charge ratio, Theor MW: theoretical molecular weight, Prec z:

Precursor charge

Chemically synthesized peptides are labelled in bold
